# Supplementary material for: Ageing and brain white matter structure in 3,513 UK Biobank participants
Source: PubMed Central journal article supplement (PMC5172385; doi:10.1038/ncomms13629), 2016-12-15
Supplement: ncomms13629-s1.pdf [file ncomms13629-s1.pdf]

### Supplementary Figures

Supplementary Figure 1. Flowchart of scanning and quality control for initial release of UK Biobank tract-averaged DT-MRI data.

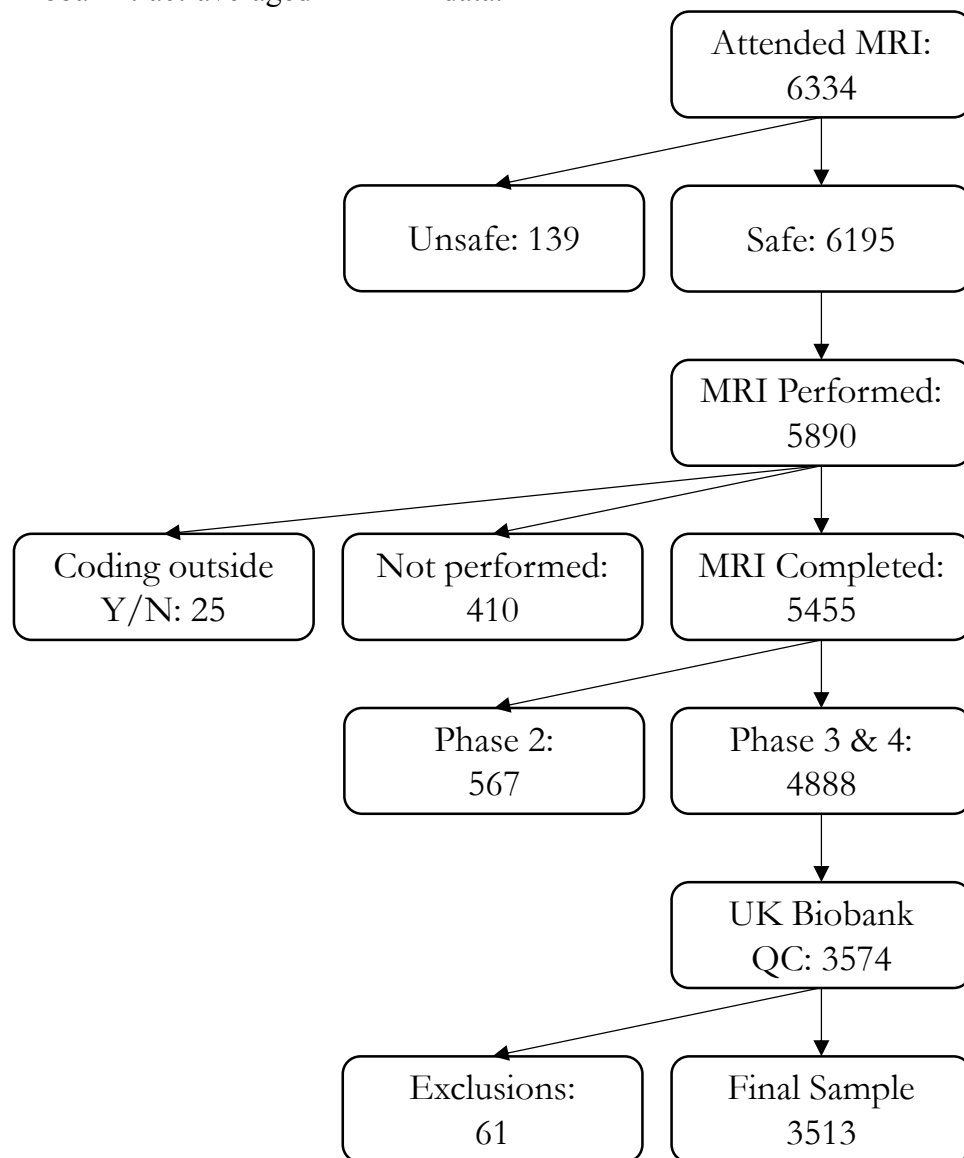

Note. Following safety ascertainment, 5,455 MRIs were completed. Of these, 4,888 comprised compatible DT-MRI data, and a total of 3,513 passed quality control (QC) procedures and exclusion criteria. Coding outside refers to instances in which yes or no were not applicable (see <http://biobank.ctsu.ox.ac.uk/crystal/field.cgi?id=12188>). DT-MRI acquired in Phase 2 was not comparable to subsequent phases, and was therefore removed from analysis.

Supplementary Figure 2. Tract-averaged diffusion characteristics of brain white matter in UK BioBank.

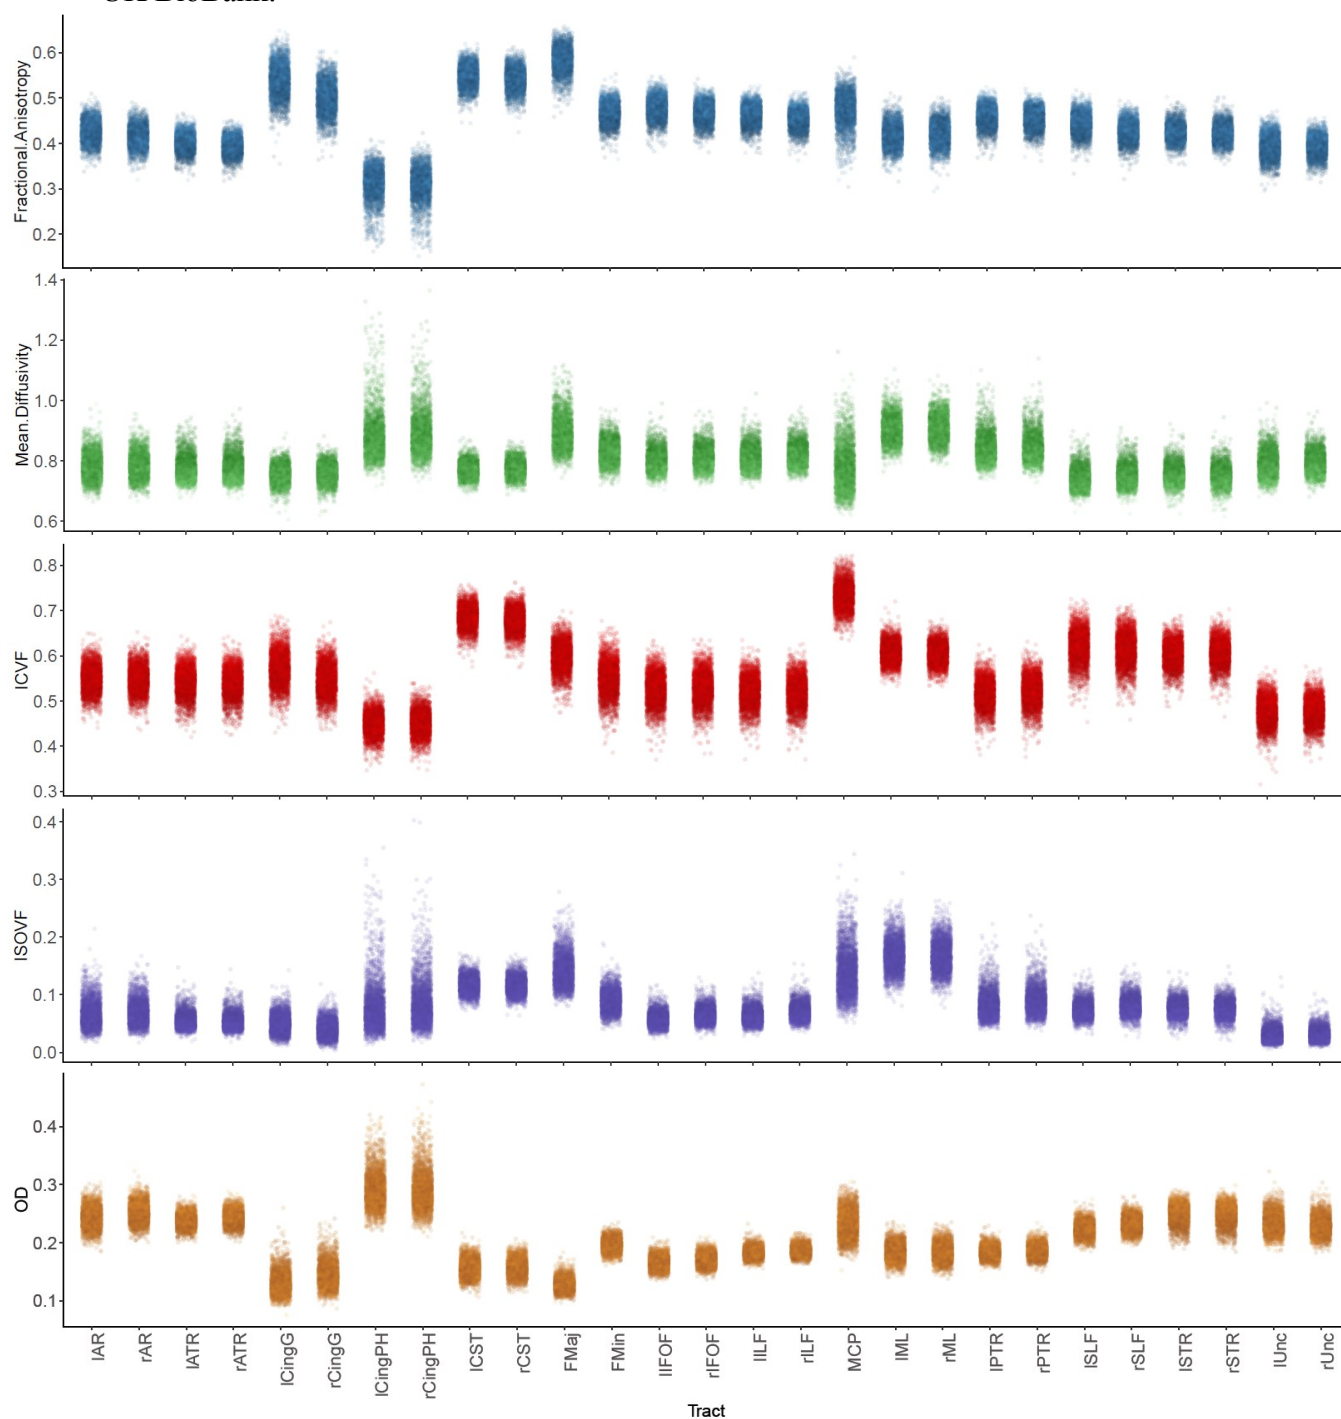

Note. FA = fractional anisotropy, MD = Mean diffusivity ( $\times 10^{-3}$  mm<sup>2</sup>/s), ICVF = intracellular volume fraction, ISOVF = isotropic volume fraction, OD = orientation dispersion. AR: acoustic radiation, ATR: anterior thalamic radiation, CingG: cingulum gyrus, CingPH: cingulum parahippocampal, CST: corticospinal tract, FMaj: forceps major, FMin: forceps minor, IFOF: inferior fronto-occipital fasciculus, ILF: inferior longitudinal fasciculus, MCP: middle cerebellar peduncle, ML: medial lemniscus, PTR: posterior thalamic radiation, SLF: superior longitudinal fasciculus, STR: superior thalamic radiation, Unc: uncinate fasciculus, l: left, r: right. Data has been jittered for visualisation purposes.

Supplementary Figure 3. Tract-averaged characteristics of supplementary brain white matter parameters in UK BioBank.

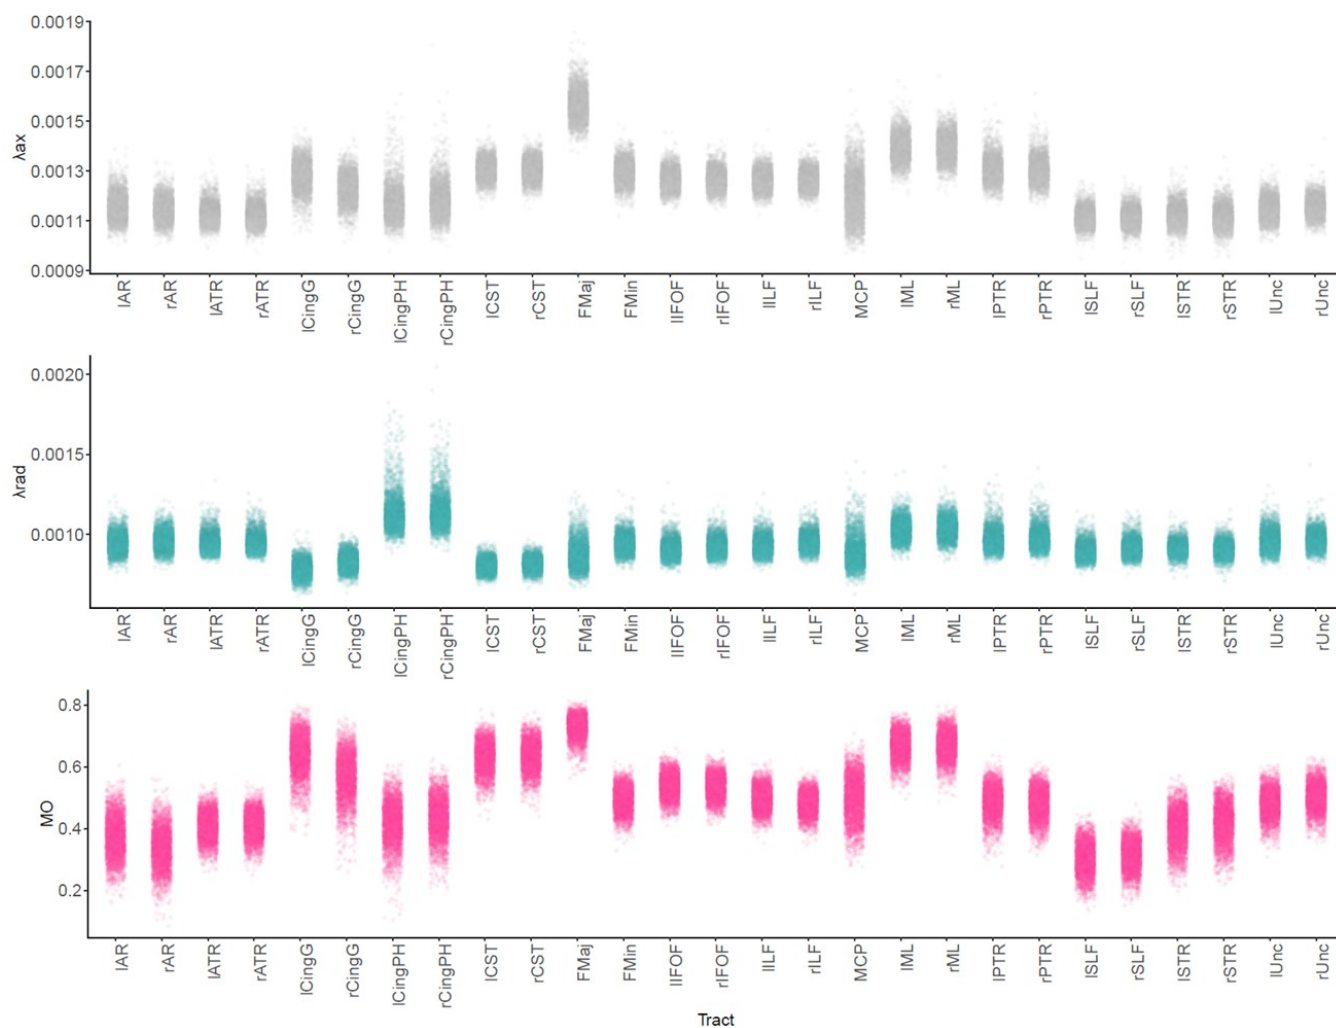

Note.  $\lambda_{ax}$  = axial diffusivity,  $\lambda_{rad}$  = radial diffusivity, MO = diffusion tensor mode. AR: acoustic radiation, ATR: anterior thalamic radiation, CingG: cingulum gyrus, CingPH: cingulum parahippocampal, CST: corticospinal tract, FMaj: forceps major, FMin: forceps minor, IFOF: inferior fronto-occipital fasciculus, ILF: inferior longitudinal fasciculus, MCP: middle cerebellar peduncle, ML: medial lemniscus, PTR: posterior thalamic radiation, SLF: superior longitudinal fasciculus, STR: superior thalamic radiation, Unc: uncinate fasciculus, l: left, r: right. Data has been jittered for visualisation purposes.

Supplementary Figure 4. Heatmaps of inter- and intra-hemispheric associations (Pearson's  $r$ ) for tract fractional anisotropy (blue), mean diffusivity (green), ICVF (red), ISOVF (purple), OD (orange), MO (pink and blue),  $\lambda_{ax}$  (grey) and  $\lambda_{rad}$  (turquoise).

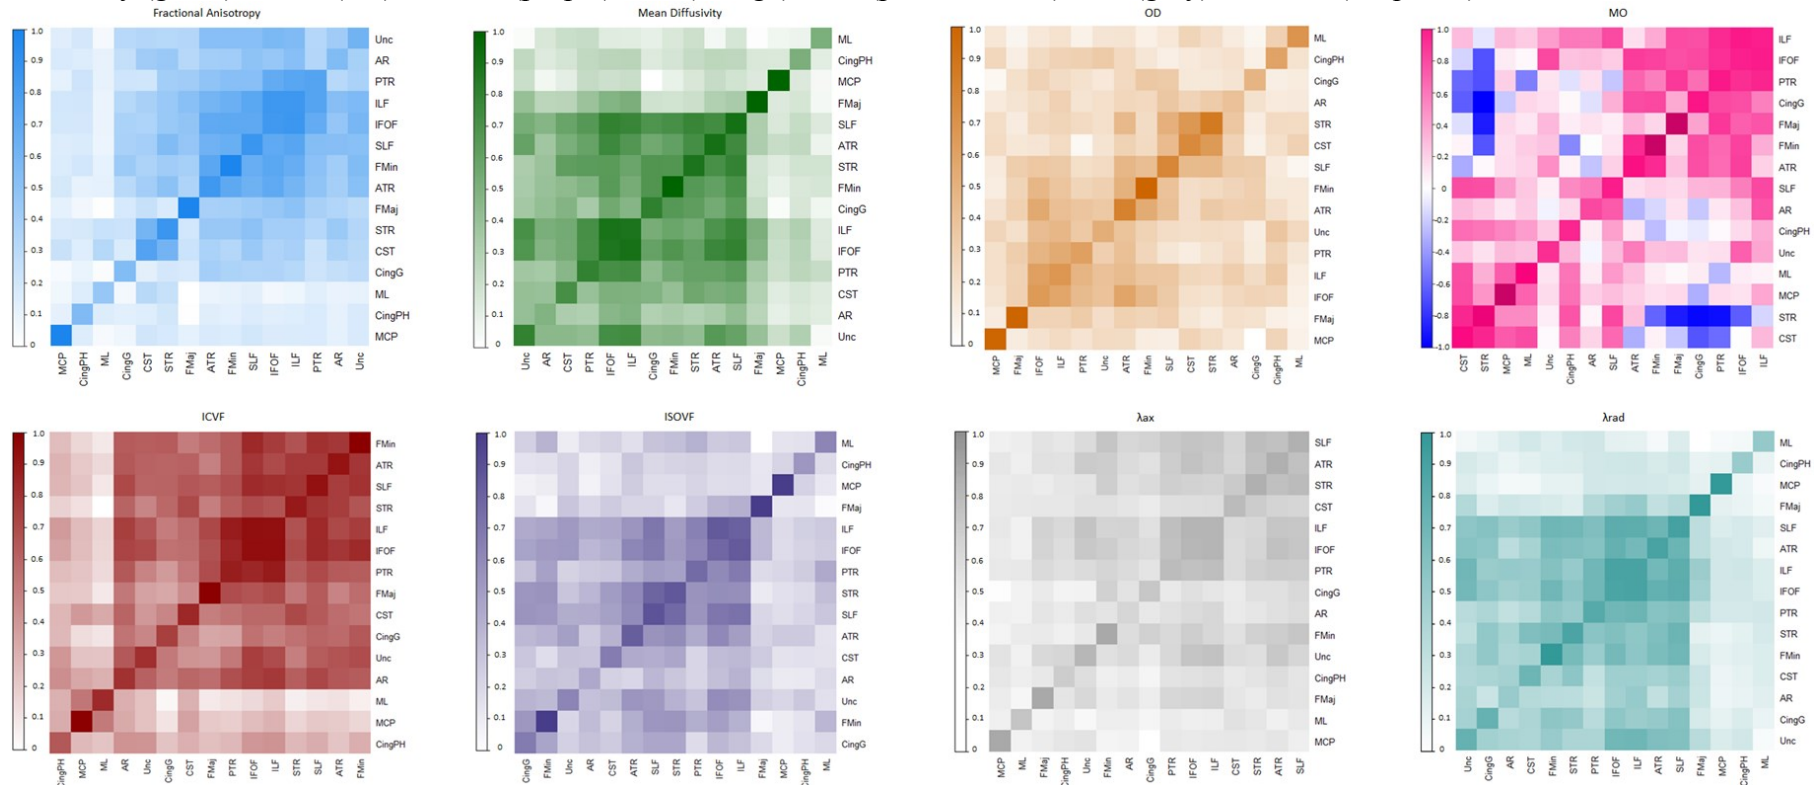

Note. Y-axis denotes left hemisphere tracts, central diagonal indicates left:right associations of tracts, except for the MCP, FMaj and FMin (where  $r = 1$ ). In each case, the heatmaps are arranged by grouping highly-correlated variables around the diagonal. The comparative absence of correlations among those tracts that show the lowest age effects (pale "L" shape; FMaj, MCP, CingPH and ML) is notable for FA, MD,  $\lambda_{rad}$ , ICVF and ISOVF.





Supplementary Figure 6. Left: Scree slopes for the exploratory factor analysis, showing the eigenvalue against the number of factors for  $\lambda_{ax}$ ,  $\lambda_{rad}$  and MO. Centre: Age trajectories of the first (latent) factor of white matter microstructure for  $\lambda_{ax}$  and  $\lambda_{rad}$ . Right: Age de-differentiation of white matter microstructure.

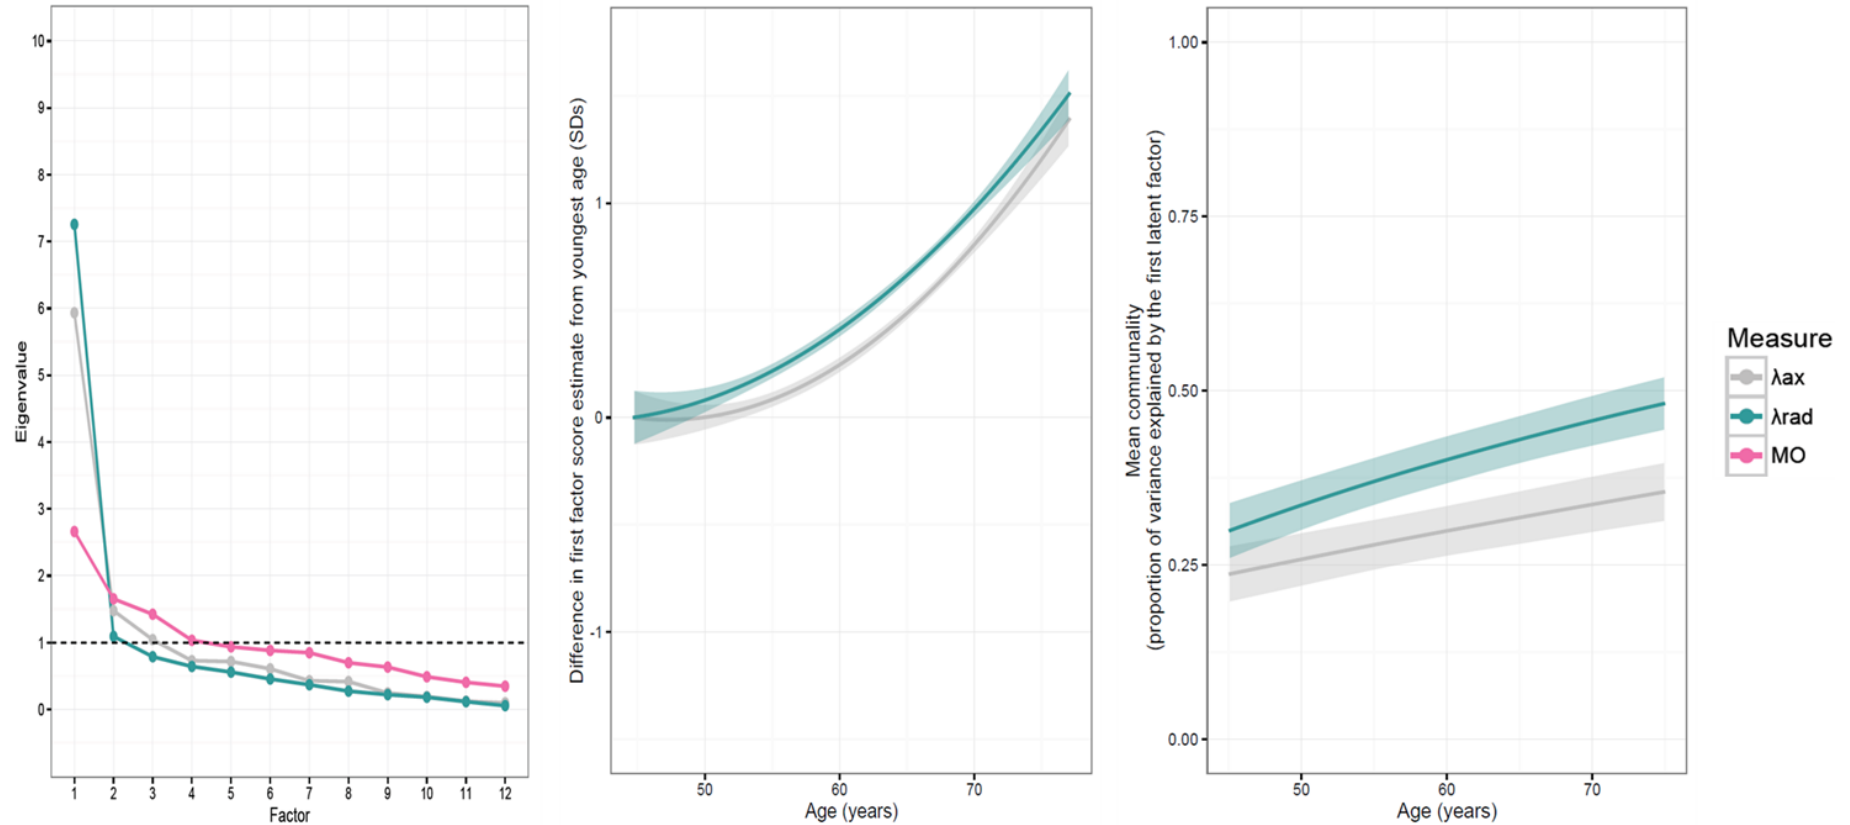

Note. Age trajectories for the proportion of total variance in each tract measurement explained by the general factor for  $\lambda_{ax}$  and  $\lambda_{rad}$ . The shaded region around each trajectory shows  $\pm 1$  SD of the mean.

Supplementary Figure 7. Common + independent pathways models for latent microstructural indices.

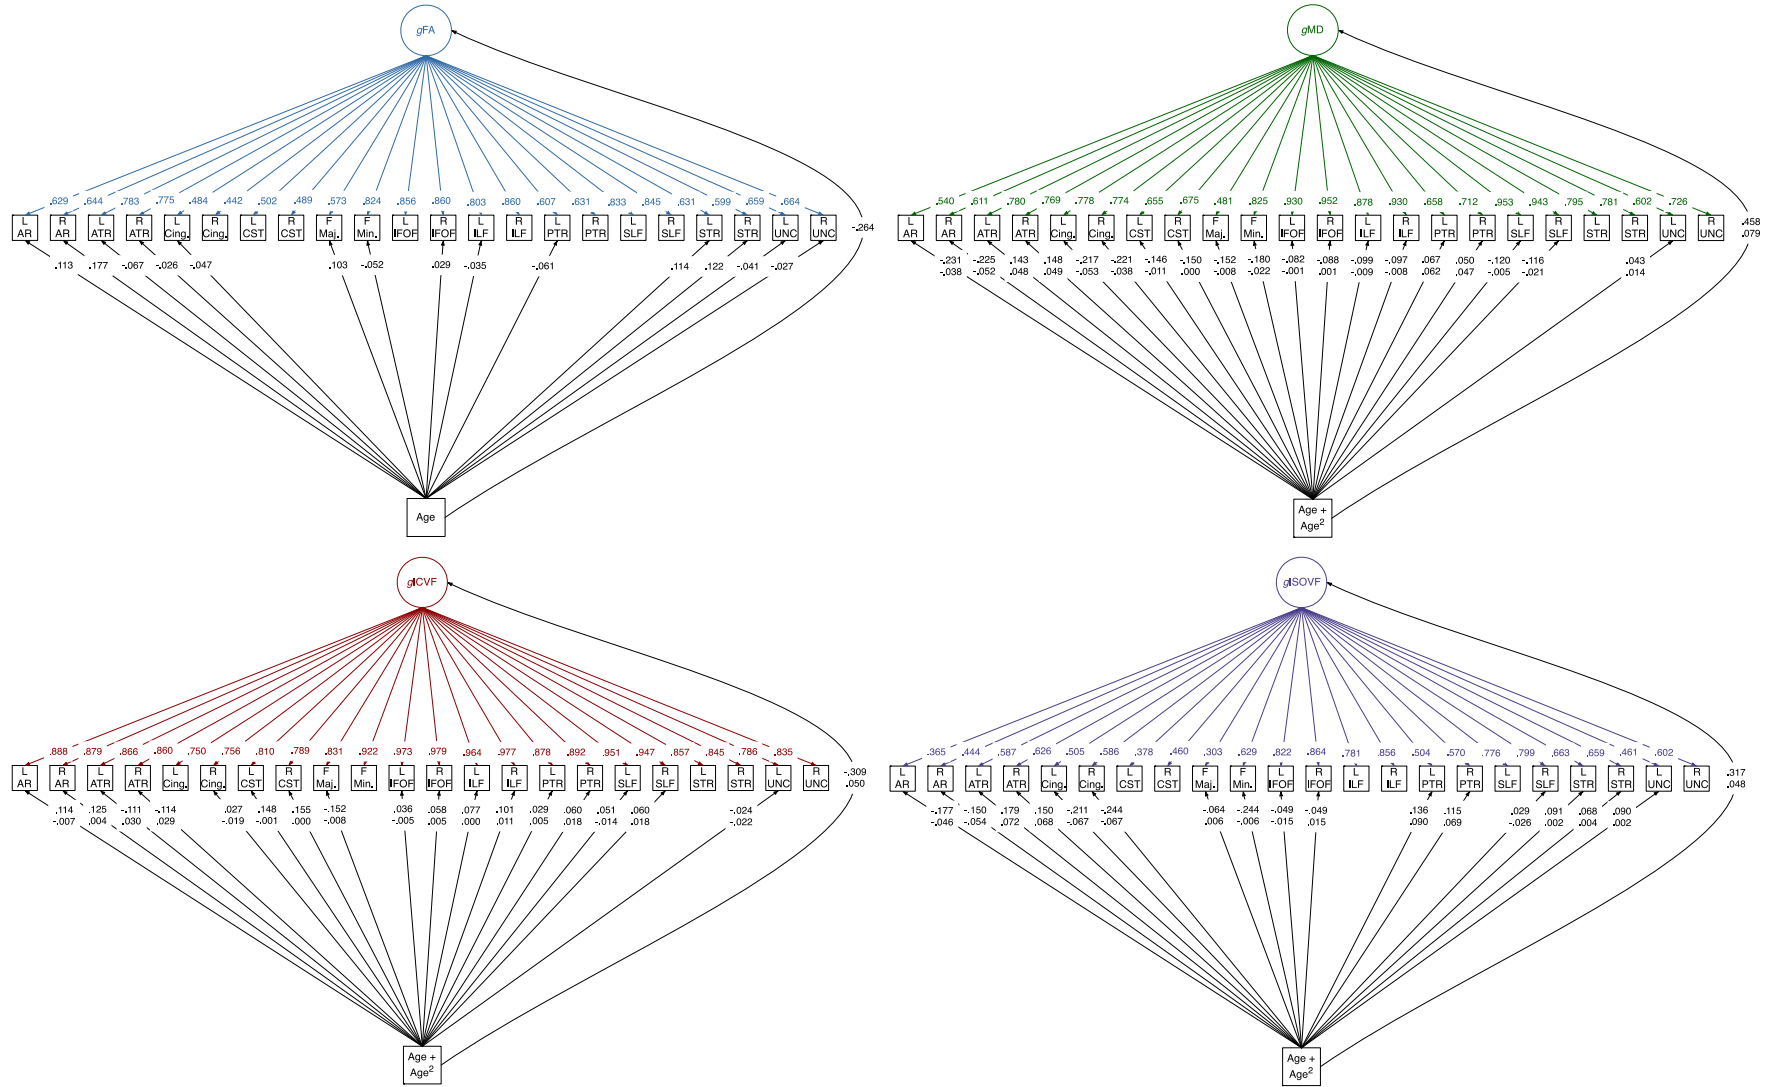

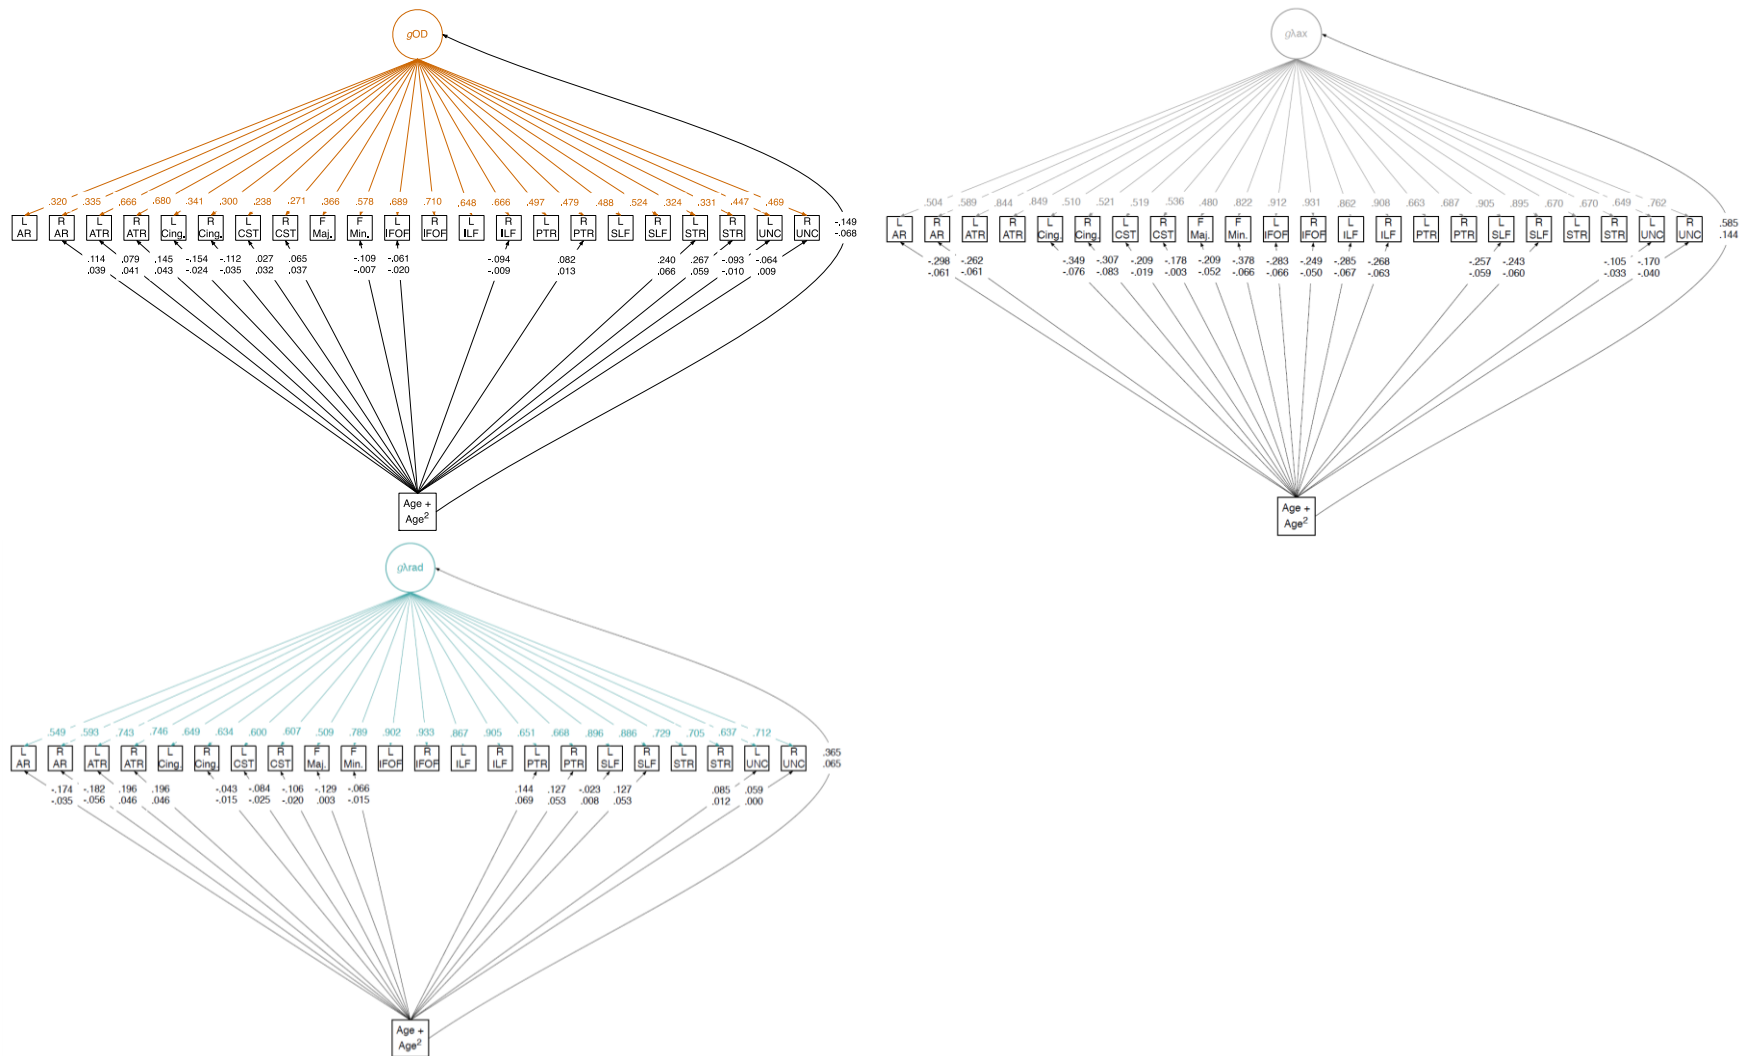

Note. Values are standardized path coefficients. For clarity, between-tract residual correlations are not shown here. FA (blue): fractional anisotropy, MD (green): mean diffusivity, ICVF (red): intracellular volume fraction, ISOVF (purple): isotropic volume fraction, OD (orange): orientation dispersion, grey:  $\lambda_{ax}$ , turquoise:  $\lambda_{rad}$ . Squares indicate manifest variables and ellipses indicate latent variables.



Supplementary Figure 8. Mediation model for age, gFA, gICVF, and gOD.

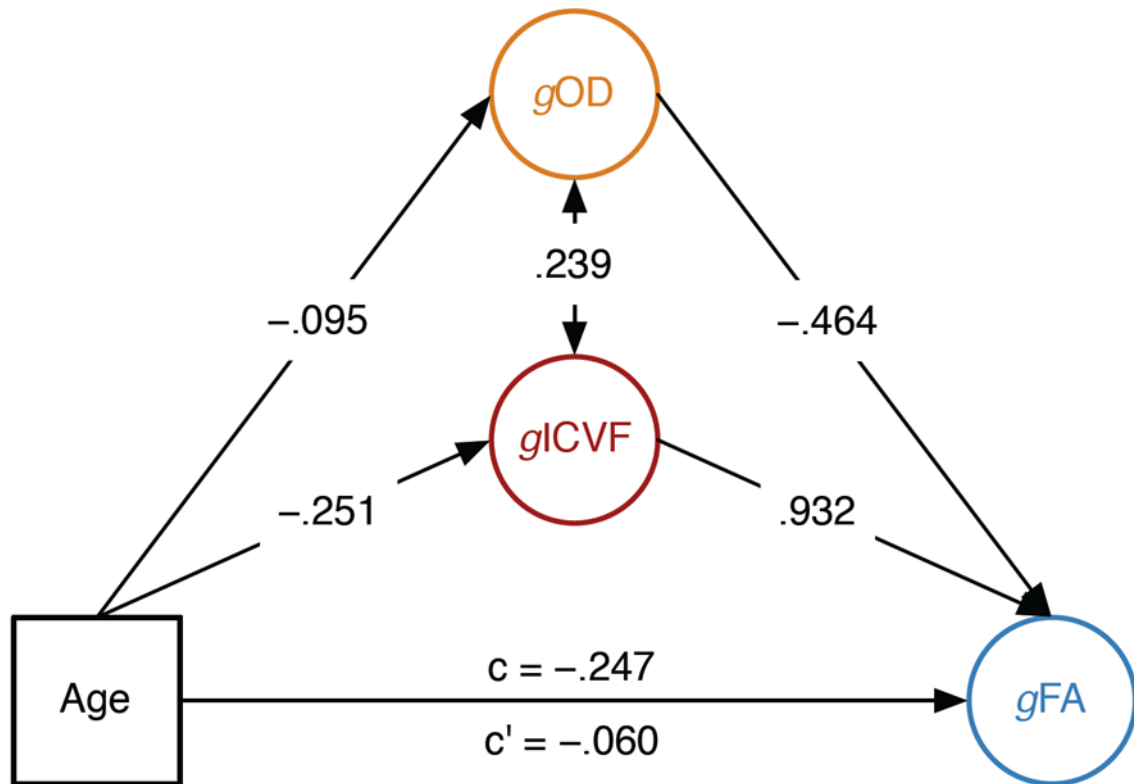

Note. The relationship between gFA and age (path  $c$ ) is 75% mediated (note lower value of path  $c'$ ) via a combination of gICVF and gOD. The majority of the mediation takes place through gICVF rather than OD (respective indirect effects are  $\beta = -0.232$  and  $\beta = 0.044$ ; see Supplementary Table 8). Standardised  $\beta$ s reported. Squares indicate manifest variables and ellipses indicate latent variables.

Supplementary Figure 9. Associations between volumetric brain MRI measures and age.

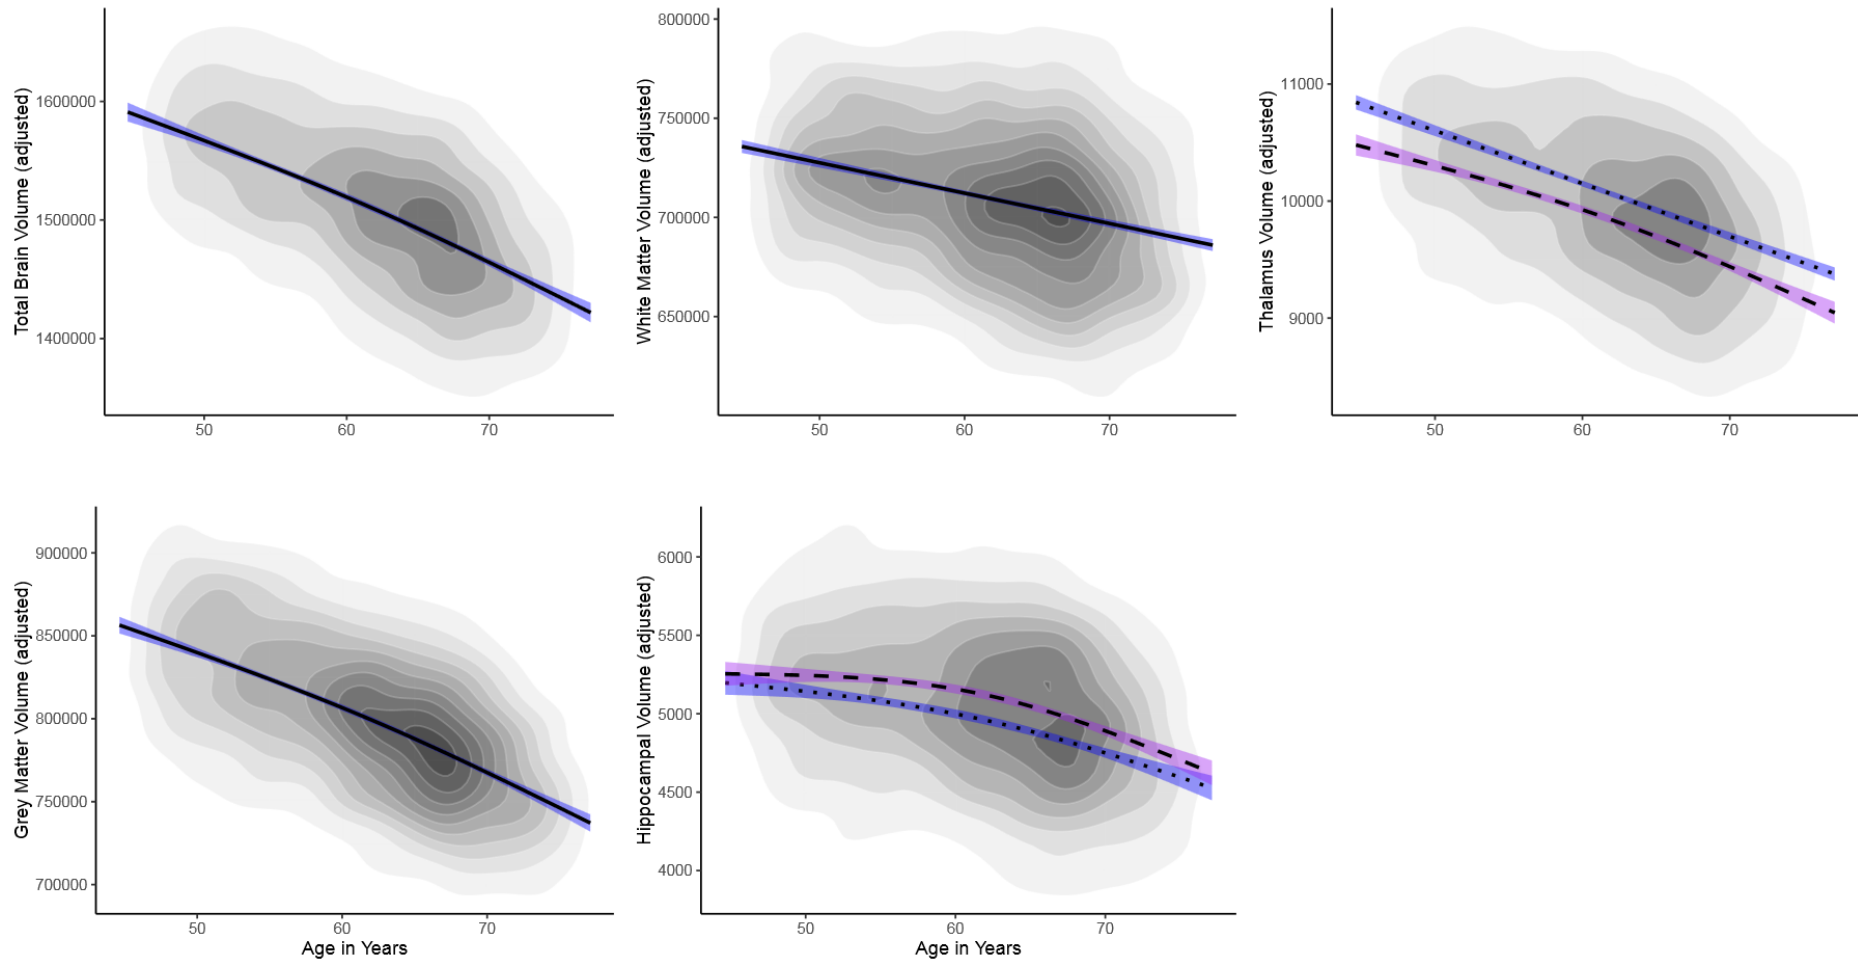

Note. Volumes in mm<sup>3</sup>, adjusted for head size. Shaded area around the regression lines are 95% CIs. Dotted line denotes left hippocampus or thalamus, dashed line denotes right.

Supplementary Figure 10. De-differentiation trajectories for FA.

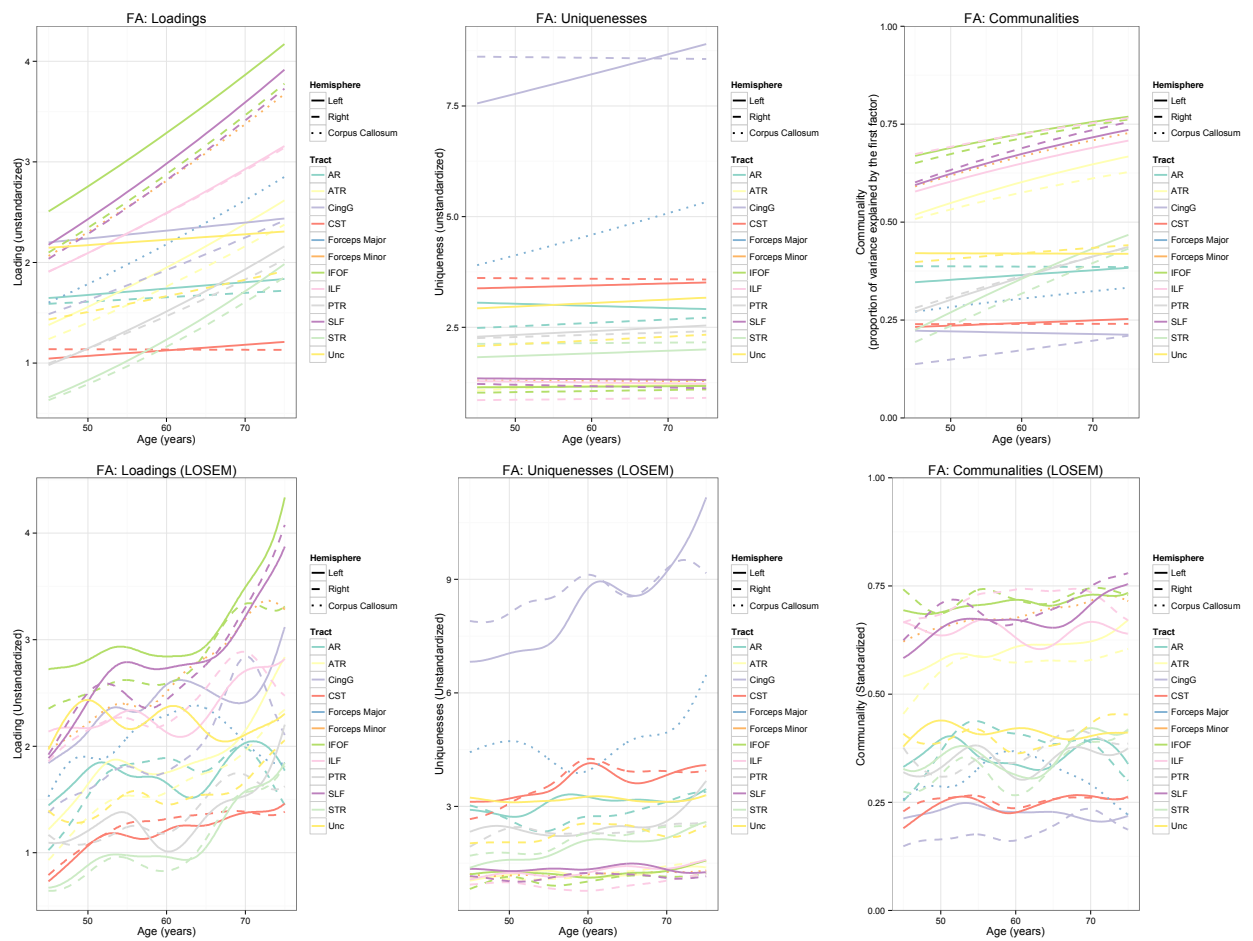

Note. Trajectories for factor loadings (left), tract uniquenesses (centre) and tract communalities (right) for fractional anisotropy (FA), taken from the multi-parameter age moderation model (top row) and LOSEM model (bottom row).

Supplementary Figure 11. De-differentiation trajectories for MD.

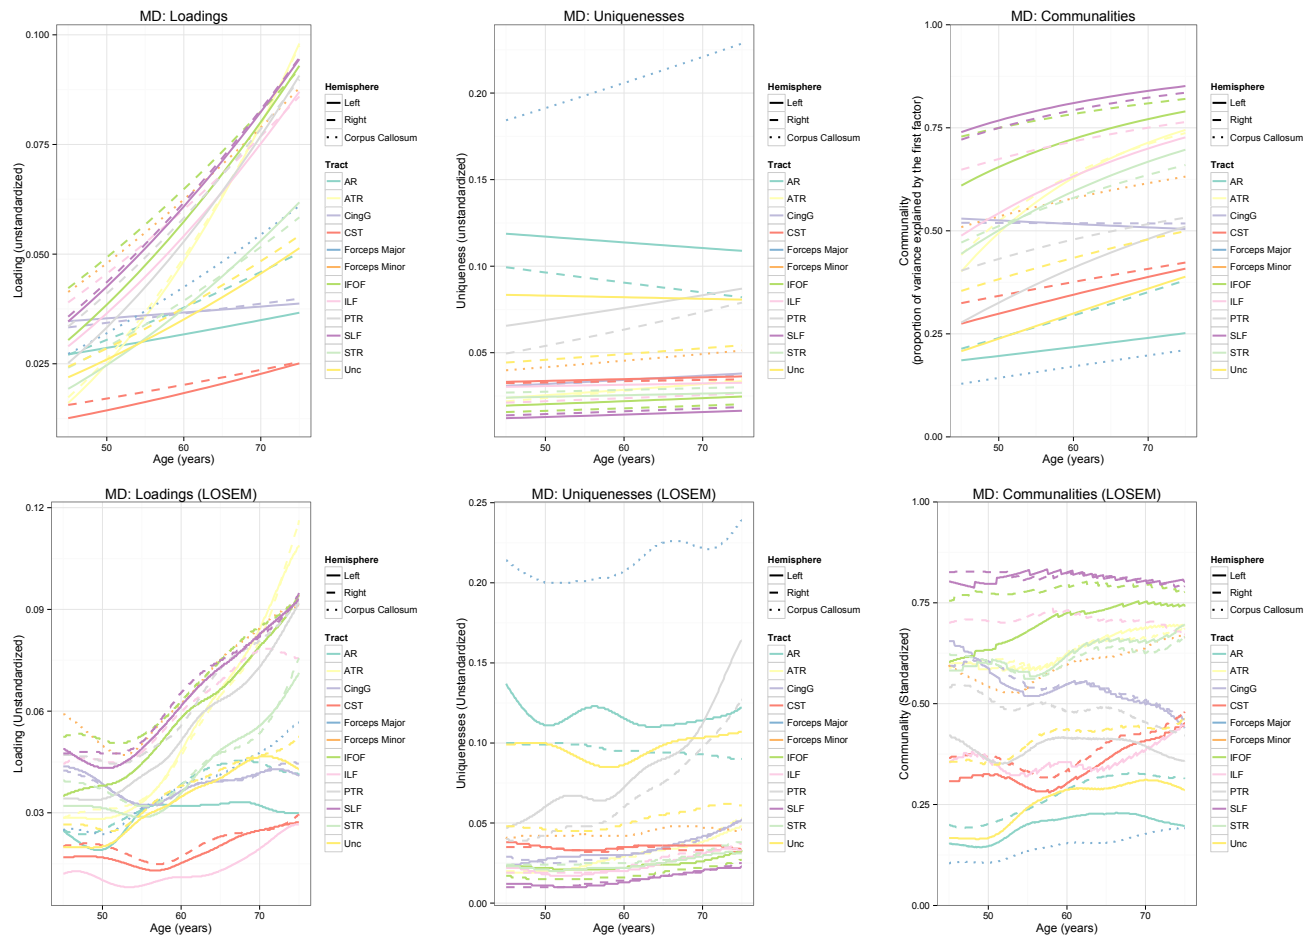

Note. Trajectories for factor loadings (left), tract uniquenesses (centre) and tract communalities (right) for mean diffusivity (MD), taken from the multi-parameter age moderation model (top row) and LOSEM model (bottom row).

Supplementary Figure 12. De-differentiation trajectories for ICVF.

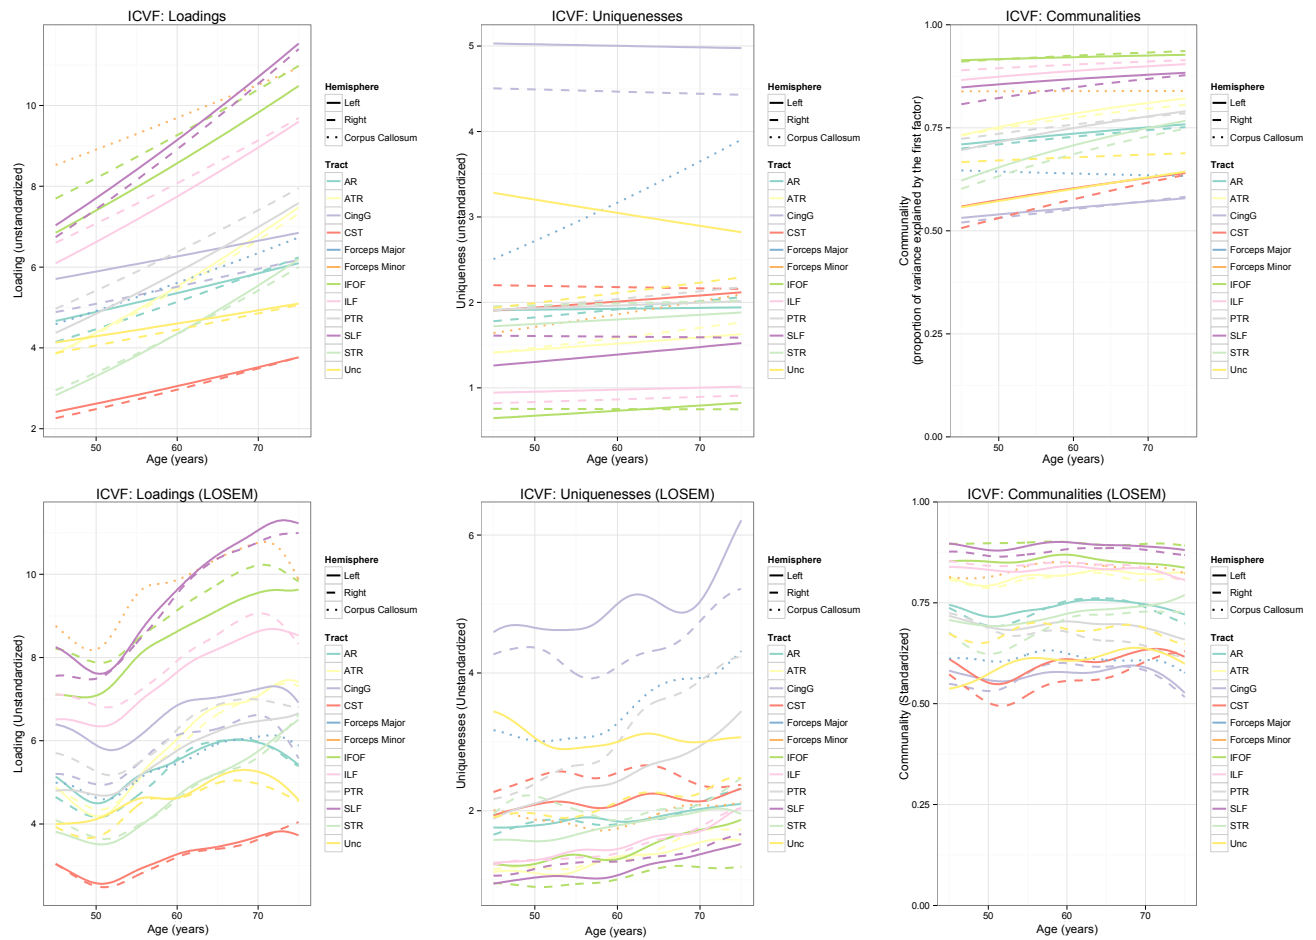

Note. Trajectories for factor loadings (left), tract uniquenesses (centre) and tract communalities (right) for intracellular volume fraction (ICVF), taken from the multi-parameter age moderation model (top row) and LOSEM model (bottom row).

Supplementary Figure 13. De-differentiation trajectories for ISOVF.

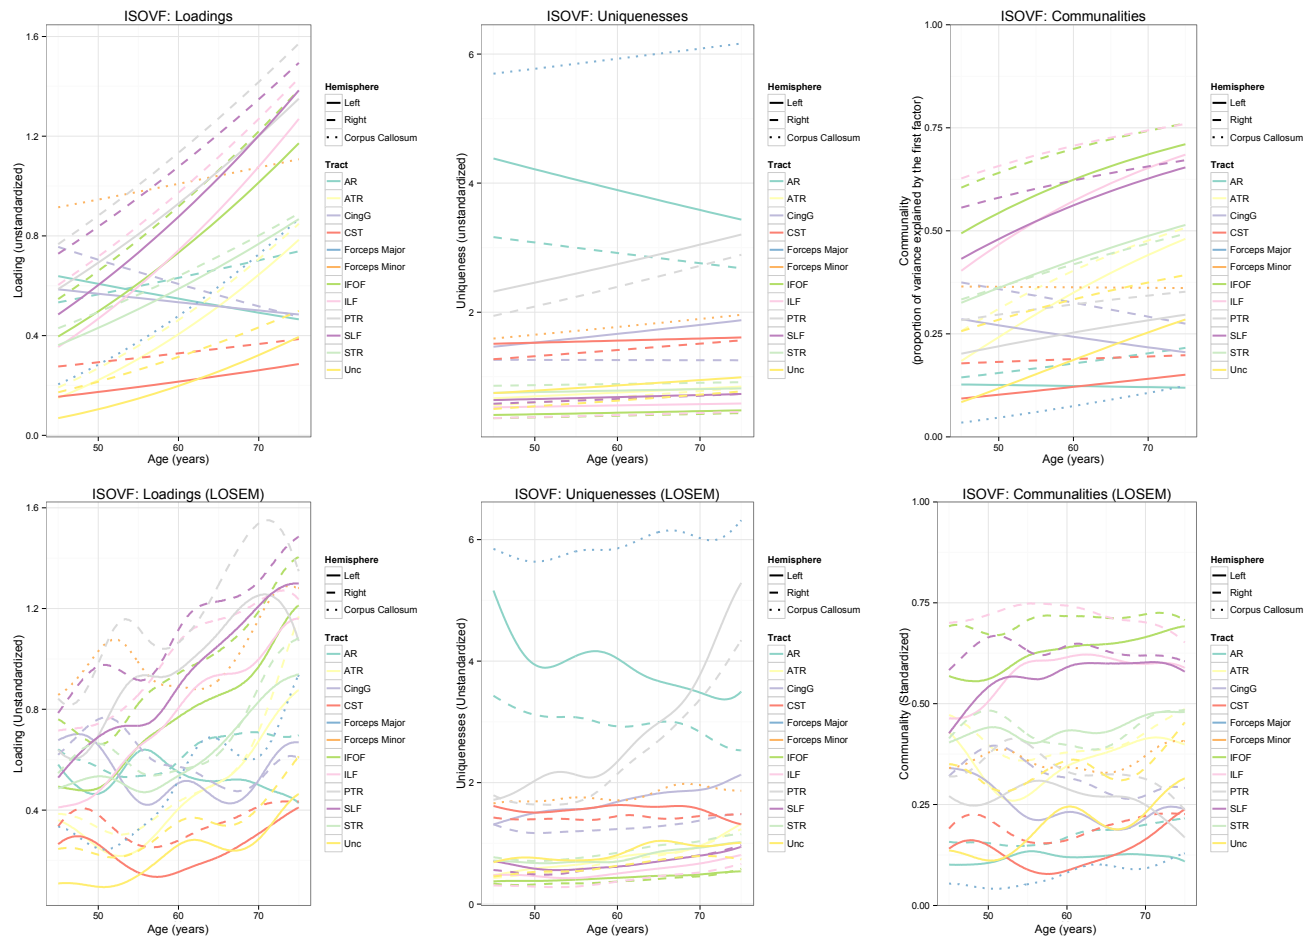

Note. Trajectories for factor loadings (left), tract uniquenesses (centre) and tract communalities (right) for isotropic volume fraction (ISOVF), taken from the multi-parameter age moderation model (top row) and LOSEM model (bottom row).



Supplementary Figure 14. De-differentiation trajectories for OD.

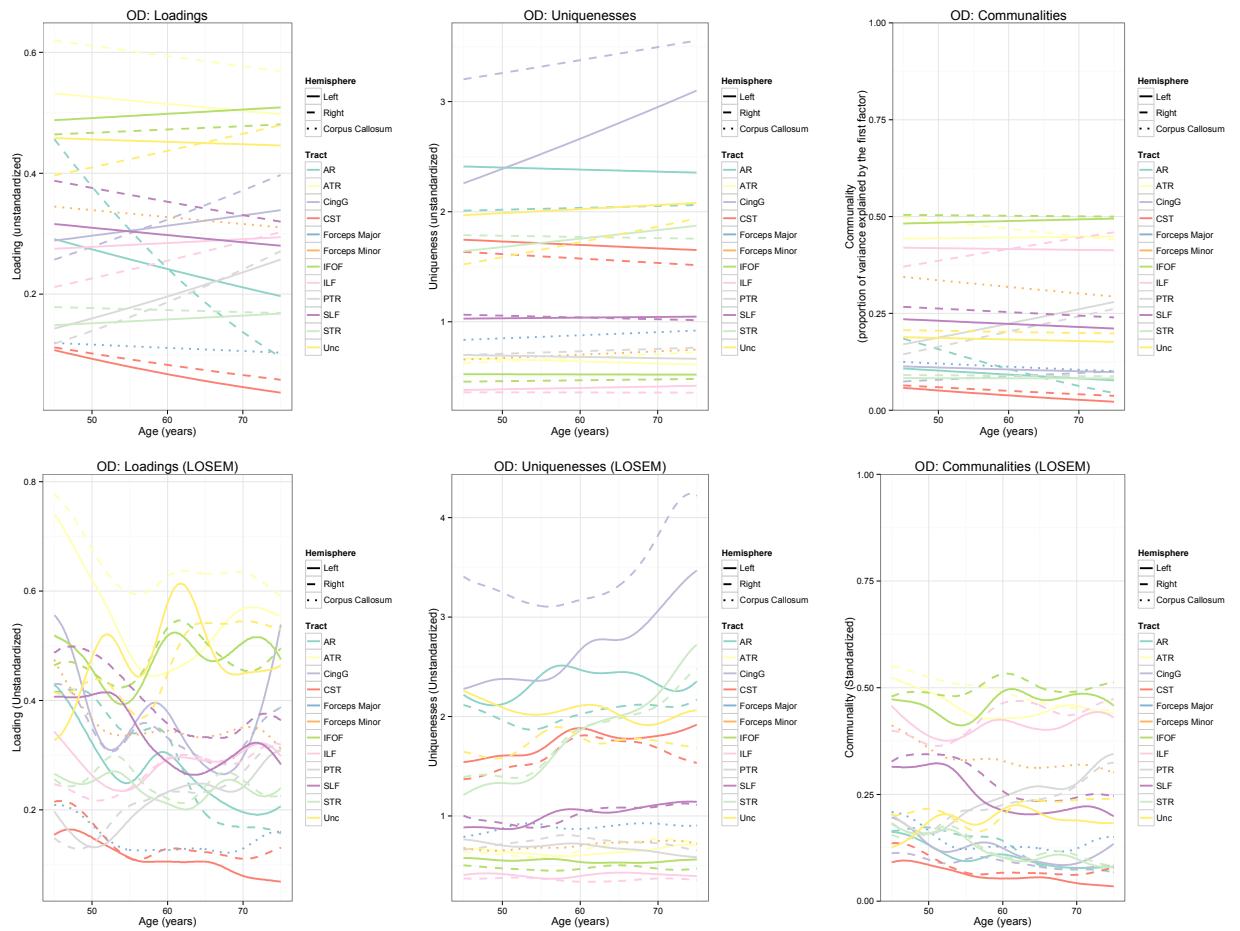

Note. Trajectories for factor loadings (left), tract uniquenesses (centre) and tract communalities (right) for orientation dispersion (OD), taken from the multi-parameter age moderation model (top row) and LOSEM model (bottom row).

Supplementary Figure 15. De-differentiation trajectories for axial diffusivity.

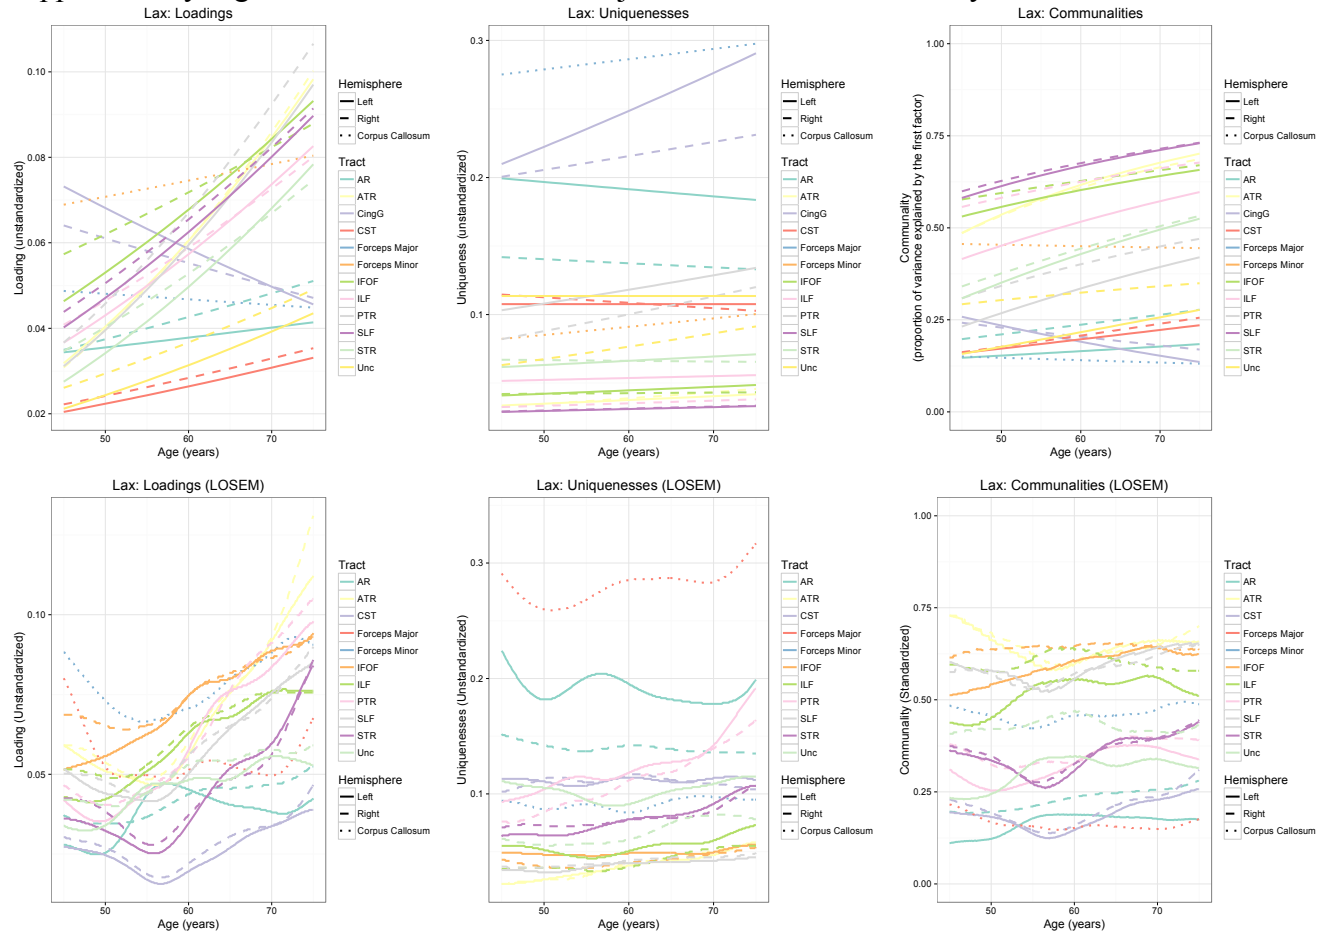

Note. Trajectories for factor loadings (left), tract uniquenesses (centre) and tract communalities (right) for axial diffusivity ( $\lambda_{ax}$ ), taken from the multi-parameter age moderation model (top row) and LOSEM model (bottom row).

Supplementary Figure 16. De-differentiation trajectories for radial diffusivity.

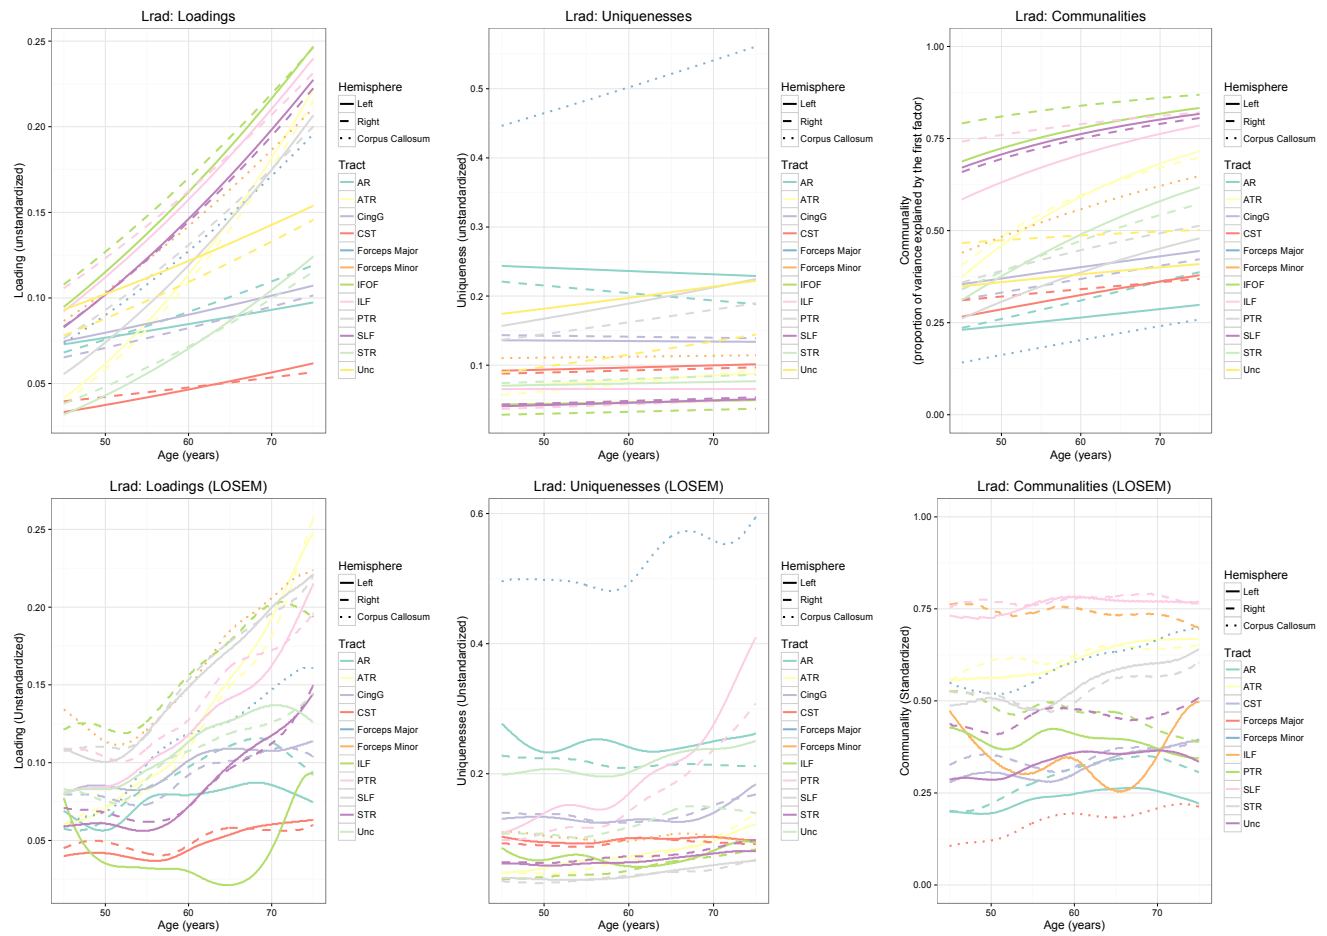

Note. Trajectories for factor loadings (left), tract uniquenesses (centre) and tract communalities (right) for radial diffusivity ( $\lambda_{rad}$ ), taken from the multi-parameter age moderation model (top row) and LOSEM model (bottom row).

## Supplementary Tables

Supplementary Table 1. Characteristics of participants and tract-averaged water diffusion parameters of white matter pathways.

|                             | <b>Variable</b>                           | <b>Unit</b>                               | <b>M(SD)</b>    | <b>N</b> |
|-----------------------------|-------------------------------------------|-------------------------------------------|-----------------|----------|
| <u>Demographics</u>         | Age                                       | Years                                     | 61.72 (7.47)    | 3513     |
|                             | Sex                                       | F:M (%F)                                  | 1849:1664 (53%) | 3513     |
|                             | College Degree                            | Yes (Yes%)                                | 1493 (43%)      | 3511     |
|                             | Heart or cardiac problem                  | Yes (Yes%)                                | 9 (<1%)         | 3511     |
|                             | Diagnosis of diabetes                     | Yes (Yes%)                                | 99 (3%)         | 3511     |
|                             | Hypertension                              | Yes (Yes%)                                | 697 (20%)       | 3511     |
|                             | Ethnicity                                 | W:M:O                                     | 3419:13:79      | 3511     |
|                             | Handedness                                | R:L:B                                     | 3137:314:60     | 3511     |
| <u>Association Fibres</u>   | Inferior Fronto-Occipital Fasciculus      | FA                                        | 0.472 (0.020)   | 3512     |
|                             |                                           | MD ( $\times 10^{-3}$ mm <sup>2</sup> /s) | 0.805 (0.030)   | 3511     |
|                             | Inferior Longitudinal Fasciculus          | FA                                        | 0.458 (0.019)   | 3513     |
|                             |                                           | MD ( $\times 10^{-3}$ mm <sup>2</sup> /s) | 0.815 (0.031)   | 3513     |
|                             | Superior Longitudinal Fasciculus          | FA                                        | 0.435 (0.020)   | 3513     |
|                             |                                           | MD ( $\times 10^{-3}$ mm <sup>2</sup> /s) | 0.746 (0.029)   | 3513     |
|                             | Uncinate Fasciculus                       | FA                                        | 0.393 (0.020)   | 3510     |
|                             |                                           | MD ( $\times 10^{-3}$ mm <sup>2</sup> /s) | 0.791 (0.033)   | 3511     |
|                             | Cingulum (Gyrus)                          | FA                                        | 0.519 (0.029)   | 3513     |
|                             |                                           | MD ( $\times 10^{-3}$ mm <sup>2</sup> /s) | 0.756 (0.026)   | 3513     |
|                             | Cingulum (Parahippocampal)                | FA                                        | 0.311 (0.029)   | 3513     |
|                             |                                           | MD ( $\times 10^{-3}$ mm <sup>2</sup> /s) | 0.881 (0.055)   | 3512     |
| <u>Thalamic Projections</u> | Anterior Thalamic Radiation               | FA                                        | 0.398 (0.017)   | 3513     |
|                             |                                           | MD ( $\times 10^{-3}$ mm <sup>2</sup> /s) | 0.774 (0.033)   | 3512     |
|                             | Posterior Thalamic Radiation              | FA                                        | 0.456 (0.019)   | 3513     |
|                             |                                           | MD ( $\times 10^{-3}$ mm <sup>2</sup> /s) | 0.842 (0.038)   | 3513     |
| Superior Thalamic Radiation | FA                                        | 0.423 (0.020)                             | 3513            |          |
|                             | MD ( $\times 10^{-3}$ mm <sup>2</sup> /s) | 0.754 (0.275)                             | 3513            |          |
| <u>Sensory Projections</u>  | Acoustic Radiation                        | FA                                        | 0.421 (0.019)   | 3513     |
|                             |                                           | MD ( $\times 10^{-3}$ mm <sup>2</sup> /s) | 0.782 (0.032)   | 3513     |
|                             | Corticospinal Tract                       | FA                                        | 0.545 (0.021)   | 3513     |
|                             |                                           | MD ( $\times 10^{-3}$ mm <sup>2</sup> /s) | 0.772 (0.219)   | 3513     |
|                             | Middle Cerebellar Peduncle                | FA                                        | 0.475 (0.033)   | 3512     |
|                             |                                           | MD ( $\times 10^{-3}$ mm <sup>2</sup> /s) | 0.774 (0.067)   | 3512     |
| Medial Lemniscus            | FA                                        | 0.419 (0.020)                             | 3513            |          |
|                             | MD ( $\times 10^{-3}$ mm <sup>2</sup> /s) | 0.906 (0.034)                             | 3512            |          |
| <u>Callosal Fibres</u>      | Forceps Major                             | FA                                        | 0.585 (0.026)   | 3513     |
|                             |                                           | MD ( $\times 10^{-3}$ mm <sup>2</sup> /s) | 0.892 (0.050)   | 3513     |
|                             | Forceps Minor                             | FA                                        | 0.467 (0.021)   | 3513     |
|                             |                                           | MD ( $\times 10^{-3}$ mm <sup>2</sup> /s) | 0.829 (0.034)   | 3510     |

*Note.* Tract values are reported for average of left and right. FA: fractional anisotropy, MD: mean diffusivity, ethnicity reported as white:mixed:other, handedness reported as right:left:both.

Supplementary Table 2. Tract-averaged NODDI characteristics of white matter pathways.

|                             | <b>Variable</b>                      | <b>Unit</b>   | <b>M(SD)</b>  | <b>N</b> |
|-----------------------------|--------------------------------------|---------------|---------------|----------|
| <u>Association Fibres</u>   | Inferior Fronto-Occipital Fasciculus | ICVF          | 0.527 (0.036) | 3512     |
|                             |                                      | ISOVF         | 0.061 (0.011) | 3511     |
|                             |                                      | OD            | 0.168 (0.009) | 3512     |
|                             | Inferior Longitudinal Fasciculus     | ICVF          | 0.519 (0.031) | 3513     |
|                             |                                      | ISOVF         | 0.067 (0.012) | 3513     |
|                             |                                      | OD            | 0.184 (0.007) | 3513     |
|                             | Superior Longitudinal Fasciculus     | ICVF          | 0.617 (0.033) | 3513     |
|                             |                                      | ISOVF         | 0.077 (0.013) | 3513     |
|                             |                                      | OD            | 0.227 (0.011) | 3513     |
|                             | Uncinate Fasciculus                  | ICVF          | 0.476 (0.027) | 3513     |
|                             |                                      | ISOVF         | 0.031 (0.009) | 3512     |
|                             |                                      | OD            | 0.231 (0.013) | 3511     |
|                             | Cingulum (Gyrus)                     | ICVF          | 0.558 (0.032) | 3513     |
|                             |                                      | ISOVF         | 0.045 (0.013) | 3513     |
|                             |                                      | OD            | 0.137 (0.016) | 3513     |
| Cingulum (Parahippocampal)  | ICVF                                 | 0.450 (0.023) | 3513          |          |
|                             | ISOVF                                | 0.080 (0.031) | 3513          |          |
|                             | OD                                   | 0.290 (0.025) | 3513          |          |
| <u>Thalamic Projections</u> | Anterior Thalamic Radiation          | ICVF          | 0.540 (0.029) | 3512     |
|                             |                                      | ISOVF         | 0.055 (0.011) | 3513     |
|                             |                                      | OD            | 0.240 (0.011) | 3512     |
|                             | Posterior Thalamic Radiation         | ICVF          | 0.518 (0.029) | 3513     |
|                             |                                      | ISOVF         | 0.086 (0.019) | 3513     |
|                             |                                      | OD            | 0.185 (0.009) | 3513     |
|                             | Superior Thalamic Radiation          | ICVF          | 0.605 (0.026) | 3513     |
|                             |                                      | ISOVF         | 0.076 (0.012) | 3513     |
|                             |                                      | OD            | 0.248 (0.015) | 3513     |
| <u>Sensory Projections</u>  | Acoustic Radiation                   | ICVF          | 0.548 (0.026) | 3513     |
|                             |                                      | ISOVF         | 0.068 (0.017) | 3513     |
|                             |                                      | OD            | 0.247 (0.013) | 3513     |
|                             | Corticospinal Tract                  | ICVF          | 0.682 (0.022) | 3513     |
|                             |                                      | ISOVF         | 0.116 (0.012) | 3513     |
|                             |                                      | OD            | 0.157 (0.013) | 3513     |
|                             | Middle Cerebellar Peduncle           | ICVF          | 0.733 (0.028) | 3512     |
|                             |                                      | ISOVF         | 0.139 (0.037) | 3512     |
|                             |                                      | OD            | 0.233 (0.022) | 3512     |
| Medial Lemniscus            | ICVF                                 | 0.606 (0.021) | 3512          |          |
|                             | ISOVF                                | 0.167 (0.022) | 3512          |          |
|                             | OD                                   | 0.184 (0.012) | 3512          |          |
| <u>Callosal Fibres</u>      | Forceps Major                        | ICVF          | 0.598 (0.030) | 3513     |
|                             |                                      | ISOVF         | 0.141 (0.025) | 3513     |
|                             |                                      | OD            | 0.127 (0.010) | 3513     |
|                             | Forceps Minor                        | ICVF          | 0.549 (0.036) | 3513     |
|                             |                                      | ISOVF         | 0.089 (0.017) | 3513     |
|                             |                                      | OD            | 0.196 (0.010) | 3513     |

Note. NODDI: Neurite orientation dispersion and density imaging, ICVF: intracellular volume fraction, ISOVF: isotropic volume fraction, OD: orientation dispersion.

Supplementary Table 3. Tract-averaged axial, radial and MO characteristics of white matter pathways.

|                             | <b>Variable</b>                      | <b>Unit</b>                          | <b>M(SD)</b>  | <b>N</b> |
|-----------------------------|--------------------------------------|--------------------------------------|---------------|----------|
| <u>Association Fibres</u>   | Inferior Fronto-Occipital Fasciculus | $\lambda_{ax}$ ( $\times 10^{-2}$ )  | 0.126 (0.003) | 3512     |
|                             |                                      | $\lambda_{rad}$ ( $\times 10^{-3}$ ) | 0.916 (0.048) | 3512     |
|                             |                                      | MO                                   | 0.538 (0.031) | 3512     |
|                             | Inferior Longitudinal Fasciculus     | $\lambda_{ax}$ ( $\times 10^{-2}$ )  | 0.126 (0.003) | 3513     |
|                             |                                      | $\lambda_{rad}$ ( $\times 10^{-3}$ ) | 0.941 (0.049) | 3513     |
|                             |                                      | MO                                   | 0.491 (0.030) | 3513     |
|                             | Superior Longitudinal Fasciculus     | $\lambda_{ax}$ ( $\times 10^{-2}$ )  | 0.111 (0.003) | 3513     |
|                             |                                      | $\lambda_{rad}$ ( $\times 10^{-3}$ ) | 0.904 (0.046) | 3513     |
|                             |                                      | MO                                   | 0.307 (0.040) | 3513     |
|                             | Uncinate Fasciculus                  | $\lambda_{ax}$ ( $\times 10^{-2}$ )  | 0.115 (0.004) | 3510     |
|                             |                                      | $\lambda_{rad}$ ( $\times 10^{-3}$ ) | 0.962 (0.052) | 3510     |
|                             |                                      | MO                                   | 0.493 (0.035) | 3506     |
|                             | Cingulum (Gyrus)                     | $\lambda_{ax}$ ( $\times 10^{-2}$ )  | 0.126 (0.005) | 3513     |
|                             |                                      | $\lambda_{rad}$ ( $\times 10^{-3}$ ) | 0.806 (0.046) | 3513     |
|                             |                                      | MO                                   | 0.608 (0.057) | 3513     |
|                             | Cingulum (Parahippocampal)           | $\lambda_{ax}$ ( $\times 10^{-2}$ )  | 0.118 (0.005) | 3513     |
|                             |                                      | $\lambda_{rad}$ ( $\times 10^{-3}$ ) | 1.140 (0.089) | 3513     |
|                             |                                      | MO                                   | 0.427 (0.054) | 3513     |
| <u>Thalamic Projections</u> | Anterior Thalamic Radiation          | $\lambda_{ax}$ ( $\times 10^{-2}$ )  | 0.112 (0.004) | 3513     |
|                             |                                      | $\lambda_{rad}$ ( $\times 10^{-3}$ ) | 0.948 (0.050) | 3513     |
|                             |                                      | MO                                   | 0.410 (0.037) | 3513     |
|                             | Posterior Thalamic Radiation         | $\lambda_{ax}$ ( $\times 10^{-2}$ )  | 0.130 (0.004) | 3513     |
|                             |                                      | $\lambda_{rad}$ ( $\times 10^{-3}$ ) | 0.971 (0.058) | 3513     |
|                             |                                      | MO                                   | 0.484 (0.040) | 3512     |
|                             | Superior Thalamic Radiation          | $\lambda_{ax}$ ( $\times 10^{-2}$ )  | 0.112 (0.004) | 3513     |
|                             |                                      | $\lambda_{rad}$ ( $\times 10^{-3}$ ) | 0.911 (0.040) | 3513     |
|                             |                                      | MO                                   | 0.404 (0.054) | 3511     |
| <u>Sensory Projections</u>  | Acoustic Radiation                   | $\lambda_{ax}$ ( $\times 10^{-2}$ )  | 0.115 (0.004) | 3513     |
|                             |                                      | $\lambda_{rad}$ ( $\times 10^{-3}$ ) | 0.953 (0.049) | 3513     |
|                             |                                      | MO                                   | 0.354 (0.048) | 3513     |
|                             | Corticospinal Tract                  | $\lambda_{ax}$ ( $\times 10^{-2}$ )  | 0.131 (0.004) | 3513     |
|                             |                                      | $\lambda_{rad}$ ( $\times 10^{-3}$ ) | 0.810 (0.036) | 3513     |
|                             |                                      | MO                                   | 0.634 (0.041) | 3513     |
|                             | Middle Cerebellar Peduncle           | $\lambda_{ax}$ ( $\times 10^{-2}$ )  | 0.120 (0.009) | 3512     |
|                             |                                      | $\lambda_{rad}$ ( $\times 10^{-3}$ ) | 0.888 (0.091) | 3512     |
|                             |                                      | MO                                   | 0.499 (0.068) | 3510     |
|                             | Medial Lemniscus                     | $\lambda_{ax}$ ( $\times 10^{-2}$ )  | 0.140 (0.004) | 3513     |
|                             |                                      | $\lambda_{rad}$ ( $\times 10^{-3}$ ) | 1.035 (0.053) | 3513     |
|                             |                                      | MO                                   | 0.670 (0.038) | 3510     |
| <u>Callosal Fibres</u>      | Forceps Major                        | $\lambda_{ax}$ ( $\times 10^{-2}$ )  | 0.157 (0.006) | 3513     |
|                             |                                      | $\lambda_{rad}$ ( $\times 10^{-3}$ ) | 0.873 (0.081) | 3513     |
|                             |                                      | MO                                   | 0.729 (0.033) | 3510     |
|                             | Forceps Minor                        | $\lambda_{ax}$ ( $\times 10^{-2}$ )  | 0.130 (0.004) | 3513     |
|                             |                                      | $\lambda_{rad}$ ( $\times 10^{-3}$ ) | 0.943 (0.053) | 3513     |
|                             |                                      | MO                                   | 0.494 (0.038) | 3513     |

Note.  $\lambda_{ax}$  = axial diffusivity,  $\lambda_{rad}$  = radial diffusivity, MO = diffusion tensor mode.



Supplementary Table 4. Regression models of age and sex on tract-averaged white matter FA and MD.

|                             | Tract                  |                           | Age                        | Age <sup>2</sup>           | Sex                        | Hemisphere                 | Sex*Age                    | R <sup>2</sup> |       |
|-----------------------------|------------------------|---------------------------|----------------------------|----------------------------|----------------------------|----------------------------|----------------------------|----------------|-------|
| <u>Association Fibres</u>   | IFOF                   | FA <sup>†</sup>           | <b>-0.221 (&lt; 0.001)</b> | -0.023 (0.035)             | 0.007 (0.523)              | <b>-0.264 (&lt; 0.001)</b> | 0.017 (0.128)              | 0.116          |       |
|                             |                        | MD <sup>†</sup>           | <b>0.338 (&lt; 0.001)</b>  | <b>0.070 (&lt; 0.001)</b>  | 0.034 (0.002)              | <b>0.129 (&lt; 0.001)</b>  | -0.009 (0.404)             | 0.127          |       |
|                             | ILF                    | FA <sup>†</sup>           | <b>-0.252 (&lt; 0.001)</b> | -0.025 (0.022)             | -0.012 (0.293)             | <b>-0.249 (&lt; 0.001)</b> | 0.016 (0.162)              | 0.123          |       |
|                             |                        | MD <sup>†</sup>           | <b>0.306 (&lt; 0.001)</b>  | <b>0.058 (&lt; 0.001)</b>  | <b>0.053 (&lt; 0.001)</b>  | <b>0.138 (&lt; 0.001)</b>  | -0.011 (0.326)             | 0.112          |       |
|                             | SLF                    | FA <sup>†</sup>           | <b>-0.213 (&lt; 0.001)</b> | -0.030 (0.005)             | 0.031 (0.005)              | <b>-0.386 (&lt; 0.001)</b> | <b>0.042 (&lt; 0.001)</b>  | 0.193          |       |
|                             |                        | MD <sup>†</sup>           | <b>0.312 (&lt; 0.001)</b>  | <b>0.061 (&lt; 0.001)</b>  | -0.009 (0.415)             | <b>0.175 (&lt; 0.001)</b>  | -0.037 (0.001)             | 0.123          |       |
|                             | Uncinate               | FA                        | <b>-0.219 (&lt; 0.001)</b> |                            | <b>0.134 ( 0.001)</b>      | -0.025 (0.028)             | 0.006 (0.623)              | 0.061          |       |
|                             |                        | MD <sup>†</sup>           | <b>0.321 (&lt; 0.001)</b>  | <b>0.058 (&lt; 0.001)</b>  | -0.011 (0.334)             | <b>0.055 (&lt; 0.001)</b>  | -0.001 (0.964)             | 0.099          |       |
|                             | Cingulum (Gyrus)       | FA                        | <b>-0.132 (&lt; 0.001)</b> |                            | <b>0.137 (&lt; 0.001)</b>  | <b>-0.511 (&lt; 0.001)</b> | 0.001 (0.898)              | 0.294          |       |
|                             |                        | MD                        | <b>0.139 (&lt; 0.001)</b>  |                            | <b>-0.081 (&lt; 0.001)</b> | <b>0.068 (&lt; 0.001)</b>  | <b>-0.053 (&lt; 0.001)</b> | 0.031          |       |
| Cingulum (PH)               | FA                     | -0.036 (0.002)            |                            | <b>0.202 (&lt; 0.001)</b>  | -0.02 (0.042)              | <b>-0.042 (&lt; 0.001)</b> | 0.043                      |                |       |
|                             | MD <sup>†</sup>        | <b>0.165 (&lt; 0.001)</b> | <b>0.062 (&lt; 0.001)</b>  | <b>0.059 (&lt; 0.001)</b>  | <b>0.083 (&lt; 0.001)</b>  | 0.025 (0.031)              | 0.038                      |                |       |
| <u>Thalamic Projections</u> | ATR                    | FA                        | <b>-0.255 (&lt; 0.001)</b> |                            | <b>0.106 (&lt; 0.001)</b>  | <b>-0.215 (&lt; 0.001)</b> | 0.035 (0.002)              | 0.119          |       |
|                             |                        | MD <sup>†</sup>           | <b>0.496 (&lt; 0.001)</b>  | <b>0.103 (&lt; 0.001)</b>  | <b>0.056 (&lt; 0.001)</b>  | 0.003 (0.783)              | -0.003 (0.752)             | 0.238          |       |
|                             | PTR                    | FA <sup>†</sup>           | <b>-0.226 (&lt; 0.001)</b> | <b>-0.039 (&lt; 0.001)</b> | 0.002 (0.835)              | <b>-0.113 (&lt; 0.001)</b> | -0.018 (0.132)             | 0.061          |       |
|                             |                        | MD <sup>†</sup>           | <b>0.362 (&lt; 0.001)</b>  | <b>0.096 (&lt; 0.001)</b>  | <b>0.104 (&lt; 0.001)</b>  | <b>0.044 (&lt; 0.001)</b>  | <b>0.038 (&lt; 0.001)</b>  | 0.144          |       |
|                             | STR                    | FA                        | -0.028 (0.016)             |                            | <b>0.190 (&lt; 0.001)</b>  | <b>-0.040 (&lt; 0.001)</b> | <b>0.067 (&lt; 0.001)</b>  | 0.042          |       |
|                             |                        | MD <sup>†</sup>           | <b>0.361 (&lt; 0.001)</b>  | <b>0.057 (&lt; 0.001)</b>  | -0.034 (0.002)             | <b>-0.060 (&lt; 0.001)</b> | 0.007 (0.519)              | 0.126          |       |
| <u>Sensory Projections</u>  | AR                     | FA                        | -0.036 (0.002)             |                            | <b>0.170 (&lt; 0.001)</b>  | <b>-0.232 (&lt; 0.001)</b> | 0.020 (0.082)              | 0.083          |       |
|                             |                        | MD                        | <b>0.043 (&lt; 0.001)</b>  |                            | <b>-0.114 ( 0.001)</b>     | <b>0.047 (&lt; 0.001)</b>  | 0.005 (0.701)              | 0.016          |       |
|                             | Corticospinal Tract    | FA                        | <b>-0.086 (&lt; 0.001)</b> |                            | <b>0.218 (&lt; 0.001)</b>  | <b>-0.151 (&lt; 0.001)</b> | <b>0.079 (&lt; 0.001)</b>  | 0.080          |       |
|                             |                        | MD <sup>†</sup>           | <b>0.155 (&lt; 0.001)</b>  | <b>0.039 (&lt; 0.001)</b>  | -0.033 (0.005)             | <b>0.093 (&lt; 0.001)</b>  | <b>0.054 (&lt; 0.001)</b>  | 0.034          |       |
|                             | MCP                    | FA                        | -0.047 (0.005)             |                            | <b>0.171 ( 0.001)</b>      | -                          | 0.006 (0.734)              | 0.030          |       |
|                             |                        | MD                        | <b>0.152 (&lt; 0.001)</b>  |                            | <b>0.103 (&lt; 0.001)</b>  | -                          | <b>0.072 (&lt; 0.001)</b>  | 0.041          |       |
|                             | Medial Lemniscus       | FA                        | -0.019 (0.113)             |                            | <b>0.193 (&lt; 0.001)</b>  | <b>0.065 (&lt; 0.001)</b>  | 0.035 (0.003)              | 0.042          |       |
|                             |                        | MD                        | <b>0.045 (&lt; 0.001)</b>  |                            | <b>-0.110 (&lt; 0.001)</b> | 0.038 (0.001)              | 0.039 (0.001)              | 0.016          |       |
|                             | <u>Callosal Fibres</u> | Forceps Major             | FA <sup>†</sup>            | <b>-0.061 (&lt; 0.001)</b> | -0.041 (0.013)             | 0.027 (0.109)              | -                          | 0.012 (0.488)  | 0.004 |
|                             |                        |                           | MD                         | <b>0.059 (&lt; 0.001)</b>  |                            | 0.025 (0.132)              | -                          | -0.017 (0.323) | 0.004 |
| Forceps Minor               |                        | FA                        | <b>-0.275 (&lt; 0.001)</b> |                            | <b>0.083 (&lt; 0.001)</b>  | -                          | 0.019 (0.239)              | 0.078          |       |
|                             |                        | MD <sup>†</sup>           | <b>0.199 (&lt; 0.001)</b>  | 0.041 (0.012)              | -0.001 (0.932)             | -                          | -0.001 (0.975)             | 0.036          |       |

Note. Standardised  $\beta$ s ( $p$  values) and adjusted  $R^2$  reported. <sup>†</sup>quadratic model significantly better fit ( $p < 0.05$ ). Bold type indicates significant effect ( $p < 0.001$ ). AR: acoustic radiation, ATR: anterior thalamic radiation, IFOF: inferior fronto-occipital fasciculus, ILF: inferior longitudinal fasciculus, MCP: middle cerebellar peduncle, PH: parahippocampal portion, PTR: posterior thalamic radiation, SLF: superior longitudinal fasciculus, STR: superior thalamic radiation, FA: fractional anisotropy, MD: mean diffusivity. Female and left hemisphere coded as 0.

Supplementary Table 5. Regression models of age and sex on tract-averaged white matter ICVF, ISOVF and OD.

|                             | Tract                                  |                            | Age                        | Age <sup>2</sup>           | Sex                        | Hemisphere                 | Sex*Age                    | R <sup>2</sup>             |       |
|-----------------------------|----------------------------------------|----------------------------|----------------------------|----------------------------|----------------------------|----------------------------|----------------------------|----------------------------|-------|
| <u>Association Fibres</u>   | IFOF                                   | ICVF†                      | <b>-0.251 (&lt; 0.001)</b> | <b>-0.047 (&lt; 0.001)</b> | <b>-0.039 (&lt; 0.001)</b> | 0.032 (0.005)              | 0.020 (0.081)              | 0.063                      |       |
|                             |                                        | ISOVF†                     | <b>0.205 (&lt; 0.001)</b>  | <b>0.046 (&lt; 0.001)</b>  | -0.014 (0.206)             | <b>0.326 (&lt; 0.001)</b>  | 0.023 (0.043)              | 0.145                      |       |
|                             |                                        | OD†                        | <b>-0.062 (&lt; 0.001)</b> | -0.036 (0.002)             | <b>-0.080 (&lt; 0.001)</b> | <b>0.247 (&lt; 0.001)</b>  | 0.010 (0.372)              | 0.071                      |       |
|                             | ILF                                    | ICVF†                      | <b>-0.021 (&lt; 0.001)</b> | <b>-0.044 (&lt; 0.001)</b> | <b>-0.060 (&lt; 0.001)</b> | -0.007 (0.564)             | 0.022 (0.067)              | 0.045                      |       |
|                             |                                        | ISOVF†                     | <b>0.241 (&lt; 0.001)</b>  | 0.0346 (0.002)             | -0.020 (0.072)             | <b>0.287 (&lt; 0.001)</b>  | 0.017 (0.122)              | 0.137                      |       |
|                             |                                        | OD†                        | 0.009 (0.453)              | -0.034 (0.003)             | <b>-0.111 (&lt; 0.001)</b> | <b>0.225 (&lt; 0.001)</b>  | 0.017 (0.154)              | 0.064                      |       |
|                             | SLF                                    | ICVF†                      | <b>-0.227 (&lt; 0.001)</b> | <b>-0.058 (&lt; 0.001)</b> | -0.016 (0.181)             | <b>-0.090 (&lt; 0.001)</b> | 0.036 (0.002)              | 0.057                      |       |
|                             |                                        | ISOVF                      | <b>0.256 (&lt; 0.001)</b>  |                            | -0.021 (0.061)             | <b>0.237 (&lt; 0.001)</b>  | -0.014 (0.198)             | 0.121                      |       |
|                             |                                        | OD†                        | <b>-0.050 (&lt; 0.001)</b> | -0.034 (0.002)             | <b>-0.102 (&lt; 0.001)</b> | <b>0.361 (&lt; 0.001)</b>  | 0.014 (0.201)              | 0.144                      |       |
|                             | Uncinate                               | ICVF†                      | <b>-0.282 (&lt; 0.001)</b> | <b>-0.067 (&lt; 0.001)</b> | <b>0.074 (&lt; 0.001)</b>  | 0.019 (0.091)              | 0.003 (0.778)              | 0.077                      |       |
|                             |                                        | ISOVF                      | <b>0.200 (&lt; 0.001)</b>  |                            | <b>0.062 (&lt; 0.001)</b>  | 0.020 (0.084)              | 0.018 (0.117)              | 0.046                      |       |
|                             |                                        | OD†                        | 0.022 (0.072)              | -0.025 (0.030)             | <b>-0.137 (&lt; 0.001)</b> | <b>-0.169 (&lt; 0.001)</b> | 0.002 (0.861)              | 0.047                      |       |
|                             | Cingulum (Gyrus)                       | ICVF†                      | <b>-0.212 (&lt; 0.001)</b> | <b>-0.050 (&lt; 0.001)</b> | <b>0.140 (&lt; 0.001)</b>  | <b>-0.344 (&lt; 0.001)</b> | 0.010 (0.378)              | 0.175                      |       |
|                             |                                        | ISOVF†                     | <b>-0.058 (&lt; 0.001)</b> | -0.035 (0.001)             | <b>0.089 (&lt; 0.001)</b>  | <b>-0.319 (&lt; 0.001)</b> | <b>-0.041 (&lt; 0.001)</b> | 0.114                      |       |
|                             |                                        | OD                         | <b>0.083 (&lt; 0.001)</b>  |                            | <b>-0.069 (&lt; 0.001)</b> | <b>0.358 (&lt; 0.001)</b>  | 0.023 (0.037)              | 0.139                      |       |
| Cingulum (PH)               | ICVF†                                  | <b>-0.047 (&lt; 0.001)</b> | <b>-0.051 (&lt; 0.001)</b> | <b>0.191 (&lt; 0.001)</b>  | 0.034 (< 0.003)            | -0.011 (0.365)             | 0.040                      |                            |       |
|                             | ISOVF†                                 | <b>0.160 (&lt; 0.001)</b>  | <b>0.045 (&lt; 0.001)</b>  | <b>0.117 (&lt; 0.001)</b>  | <b>0.089 (&lt; 0.001)</b>  | 0.029 (0.014)              | 0.049                      |                            |       |
|                             | OD                                     | 0.024 (0.040)              |                            | <b>-0.157 (&lt; 0.001)</b> | -0.029 (0.015)             | <b>0.039 (&lt; 0.001)</b>  | 0.026                      |                            |       |
| <u>Thalamic Projections</u> | ATR                                    | ICVF†                      | <b>-0.382 (&lt; 0.001)</b> | <b>-0.070 (&lt; 0.001)</b> | 0.027 (0.015)              | -0.017 (0.124)             | 0.001 (0.908)              | 0.136                      |       |
|                             |                                        | ISOVF†                     | <b>0.343 (&lt; 0.001)</b>  | <b>0.089 (&lt; 0.001)</b>  | <b>0.135 (&lt; 0.001)</b>  | <b>-0.061 (&lt; 0.001)</b> | 0.009 (0.428)              | 0.139                      |       |
|                             |                                        | OD†                        | <b>-0.197 (&lt; 0.001)</b> | <b>-0.077 (&lt; 0.001)</b> | <b>-0.125 (&lt; 0.001)</b> | <b>0.215 (&lt; 0.001)</b>  | -0.011 (0.346)             | 0.103                      |       |
|                             | PTR                                    | ICVF†                      | <b>-0.220 (&lt; 0.001)</b> | -0.033 (0.004)             | <b>-0.108 (&lt; 0.001)</b> | <b>0.083 (&lt; 0.001)</b>  | -0.004 (0.714)             | 0.068                      |       |
|                             |                                        | ISOVF†                     | <b>0.285 (&lt; 0.001)</b>  | <b>0.093 (&lt; 0.001)</b>  | 0.019 (0.091)              | <b>0.175 (&lt; 0.001)</b>  | <b>0.042 (&lt; 0.001)</b>  | 0.111                      |       |
|                             |                                        | OD†                        | <b>-0.103 (&lt; 0.001)</b> | -0.029 (0.010)             | <b>-0.163 (&lt; 0.001)</b> | <b>0.119 (&lt; 0.001)</b>  | 0.007 (0.524)              | 0.053                      |       |
|                             | STR                                    | ICVF†                      | <b>-0.260 (&lt; 0.001)</b> | <b>-0.048 (&lt; 0.001)</b> | -0.012 (0.282)             | <b>0.056 (&lt; 0.001)</b>  | 0.012 (0.301)              | 0.067                      |       |
|                             |                                        | ISOVF†                     | <b>0.295 (&lt; 0.001)</b>  | 0.032 (0.005)              | <b>-0.065 (&lt; 0.001)</b> | -0.027 (0.017)             | 0.008 (0.467)              | 0.085                      |       |
|                             |                                        | OD†                        | <b>-0.277 (&lt; 0.001)</b> | <b>-0.069 (&lt; 0.001)</b> | <b>-0.255 (&lt; 0.001)</b> | <b>-0.038 (&lt; 0.001)</b> | -0.044 (< 0.001)           | 0.151                      |       |
|                             | <u>Motor &amp; Sensory Projections</u> | AR                         | ICVF†                      | <b>-0.161 (&lt; 0.001)</b> | <b>-0.048 (&lt; 0.001)</b> | <b>0.084 (&lt; 0.001)</b>  | -0.019 (0.103)             | 0.018 (0.126)              | 0.029 |
|                             |                                        |                            | ISOVF†                     | -0.031 (0.011)             | -0.029 (0.012)             | <b>-0.064 (&lt; 0.001)</b> | <b>0.072 (&lt; 0.001)</b>  | 0.021 (0.084)              | 0.011 |
|                             |                                        |                            | OD†                        | <b>-0.107 (&lt; 0.001)</b> | <b>-0.047 (&lt; 0.001)</b> | <b>-0.096 (&lt; 0.001)</b> | <b>0.270 (&lt; 0.001)</b>  | 0.006 (0.628)              | 0.095 |
|                             |                                        | Corticospinal Tract        | ICVF†                      | <b>-0.102 (&lt; 0.001)</b> | <b>-0.045 (&lt; 0.001)</b> | <b>0.107 (&lt; 0.001)</b>  | <b>-0.161 (&lt; 0.001)</b> | 0.009 (0.454)              | 0.045 |
|                             |                                        |                            | ISOVF                      | <b>0.153 (&lt; 0.001)</b>  |                            | 0.006 (0.583)              | <b>-0.019 (0.111)</b>      | <b>0.048 (&lt; 0.001)</b>  | 0.026 |
|                             |                                        |                            | OD†                        | <b>-0.060 (&lt; 0.001)</b> | -0.036 (0.001)             | <b>-0.261 (&lt; 0.001)</b> | 0.013 (0.241)              | <b>-0.050 (&lt; 0.001)</b> | 0.077 |
| MCP                         |                                        | ICVF†                      | <b>-0.057 (&lt; 0.001)</b> | -0.057 (0.004)             | <b>0.196 (&lt; 0.001)</b>  | -                          | -0.002 (0.925)             | 0.040                      |       |
|                             |                                        | ISOVF                      | <b>0.146 (&lt; 0.001)</b>  |                            | 0.016 (0.330)              | -                          | <b>0.069 (&lt; 0.001)</b>  | 0.049                      |       |
|                             |                                        | OD                         | -0.003 (0.047)             |                            | <b>-0.184 (&lt; 0.001)</b> | -                          | -0.012 (0.483)             | 0.035                      |       |
| Medial Lemniscus            |                                        | ICVF                       | 0.016 (0.165)              |                            | <b>0.242 (&lt; 0.001)</b>  | <b>-0.053 (&lt; 0.001)</b> | -0.001 (0.916)             | 0.061                      |       |
|                             |                                        | ISOVF                      | 0.037 (0.002)              |                            | -0.030 (0.013)             | -0.003 (0.828)             | 0.037 (0.002)              | 0.003                      |       |
|                             |                                        | OD                         | 0.023 (0.048)              |                            | <b>-0.156 (&lt; 0.001)</b> | -0.008 (0.503)             | -0.031 (0.009)             | 0.025                      |       |
| <u>Callosal Fibres</u>      |                                        | Forceps Major              | ICVF†                      | <b>-0.100 (&lt; 0.001)</b> | -0.042 (0.011)             | <b>-0.076 (&lt; 0.001)</b> | -                          | 0.021 (0.223)              | 0.016 |
|                             |                                        |                            | ISOVF                      | 0.029 (0.089)              |                            | -0.024 (0.164)             | -                          | -0.016 (0.333)             | 0.001 |
|                             |                                        |                            | OD                         | -0.049 (0.003)             |                            | <b>-0.200 (&lt; 0.001)</b> | -                          | 0.020 (0.221)              | 0.044 |
|                             | Forceps Minor                          | ICVF†                      | <b>-0.281 (&lt; 0.001)</b> | -0.032 (0.044)             | -0.004 (0.817)             | -                          | 0.024 (0.136)              | 0.075                      |       |
|                             |                                        | ISOVF                      | -0.050 (0.003)             |                            | -0.009 (0.603)             | -                          | 0.030 (0.079)              | 0.003                      |       |
|                             |                                        | OD                         | 0.042 (0.013)              |                            | <b>-0.140 (&lt; 0.001)</b> | -                          | 0.008 (0.621)              | 0.020                      |       |

Note. Standardised  $\beta$ s ( $p$  values) and adjusted  $R^2$  reported. †quadratic model significantly better fit ( $p < 0.05$ ). Bold type indicates significant ( $p < 0.001$ ). AR: acoustic radiation, ATR: anterior thalamic radiation, IFOF: inferior fronto-occipital fasciculus, ILF: inferior longitudinal fasciculus, MCP: middle cerebellar peduncle, PH: parahippocampal portion, PTR: posterior thalamic radiation, SLF: superior longitudinal fasciculus, STR: superior thalamic radiation, FA: fractional anisotropy, MD: mean diffusivity. Female and left hemisphere coded as 0.

Supplementary Table 6. Regression models of age and sex on tract-averaged white matter  $\lambda_{ax}$ ,  $\lambda_{rad}$  and MO.

|                             | Tract                                  |                           | Age                        | Age <sup>2</sup>           | Sex                        | Hemisphere                 | Sex*Age                    | R <sup>2</sup>            |       |
|-----------------------------|----------------------------------------|---------------------------|----------------------------|----------------------------|----------------------------|----------------------------|----------------------------|---------------------------|-------|
| <u>Association Fibres</u>   | IFOF                                   | $\lambda_{ax}^\dagger$    | <b>0.268 (&lt; 0.001)</b>  | <b>0.070 (&lt; 0.001)</b>  | <b>0.059 (&lt; 0.001)</b>  | -0.019 (0.096)             | -0.010 (0.407)             | 0.073                     |       |
|                             |                                        | $\lambda_{rad}^\dagger$   | <b>0.331 (&lt; 0.001)</b>  | <b>0.062 (&lt; 0.001)</b>  | 0.011 (0.340)              | <b>0.183 (&lt; 0.001)</b>  | -0.008 (0.448)             | 0.136                     |       |
|                             |                                        | MO                        | <b>-0.078 (&lt; 0.001)</b> |                            | <b>0.072 (&lt; 0.001)</b>  | <b>-0.075 (&lt; 0.001)</b> | -0.028 (0.020)             | 0.016                     |       |
|                             | ILF                                    | $\lambda_{ax}^\dagger$    | <b>0.235 (&lt; 0.001)</b>  | <b>0.058 (&lt; 0.001)</b>  | <b>0.077 (&lt; 0.001)</b>  | 0.008 (0.505)              | -0.012 (0.291)             | 0.060                     |       |
|                             |                                        | $\lambda_{rad}^\dagger$   | <b>0.314 (&lt; 0.001)</b>  | <b>0.054 (&lt; 0.001)</b>  | 0.026 (0.022)              | <b>0.195 (&lt; 0.001)</b>  | -0.008 (0.463)             | 0.132                     |       |
|                             |                                        | MO <sup>†</sup>           | <b>-0.105 (&lt; 0.001)</b> | -0.027 (0.015)             | <b>0.170 (&lt; 0.001)</b>  | <b>-0.251 (&lt; 0.001)</b> | -0.020 (0.082)             | 0.099                     |       |
|                             | SLF                                    | $\lambda_{ax}^\dagger$    | <b>0.277 (&lt; 0.001)</b>  | <b>0.063 (&lt; 0.001)</b>  | 0.029 (0.011)              | -0.013 (0.254)             | -0.023 (0.045)             | 0.074                     |       |
|                             |                                        | $\lambda_{rad}^\dagger$   | <b>0.299 (&lt; 0.001)</b>  | <b>0.055 (&lt; 0.001)</b>  | <b>-0.041 (&lt; 0.001)</b> | <b>0.224 (&lt; 0.001)</b>  | <b>-0.041 (&lt; 0.001)</b> | 0.135                     |       |
|                             |                                        | MO                        | -0.001 (0.916)             |                            | <b>0.215 (&lt; 0.001)</b>  | <b>0.116 (&lt; 0.001)</b>  | 0.002 (0.167)              | 0.060                     |       |
|                             | Uncinate                               | $\lambda_{ax}^\dagger$    | <b>0.266 (&lt; 0.001)</b>  | <b>0.059 (&lt; 0.001)</b>  | <b>0.066 (&lt; 0.001)</b>  | <b>0.113 (&lt; 0.001)</b>  | 0.003 (0.819)              | 0.086                     |       |
|                             |                                        | $\lambda_{rad}^\dagger$   | <b>0.320 (&lt; 0.001)</b>  | <b>0.050 (&lt; 0.001)</b>  | <b>-0.048 (&lt; 0.001)</b> | 0.009 (0.441)              | -0.002 (0.882)             | 0.096                     |       |
|                             |                                        | MO                        | <b>-0.047 (&lt; 0.001)</b> |                            | <b>0.056 (&lt; 0.001)</b>  | <b>0.274 (&lt; 0.001)</b>  | 0.002 (0.836)              | 0.080                     |       |
|                             | Cingulum (Gyrus)                       | $\lambda_{ax}$            | -0.027 (0.011)             |                            | <b>0.049 (&lt; 0.001)</b>  | <b>-0.429 (&lt; 0.001)</b> | <b>-0.042 (&lt; 0.001)</b> | 0.189                     |       |
|                             |                                        | $\lambda_{rad}^\dagger$   | <b>0.202 (&lt; 0.001)</b>  | 0.031 (0.002)              | <b>-0.127 (&lt; 0.001)</b> | <b>0.450 (&lt; 0.001)</b>  | -0.026 (0.012)             | 0.253                     |       |
|                             |                                        | MO <sup>†</sup>           | <b>-0.235 (&lt; 0.001)</b> | <b>-0.056 (&lt; 0.001)</b> | <b>0.054 (&lt; 0.001)</b>  | <b>-0.496 (&lt; 0.001)</b> | -0.020 (0.052)             | 0.299                     |       |
| Cingulum (PH)               | $\lambda_{ax}^\dagger$                 | <b>0.168 (&lt; 0.001)</b> | <b>0.065 (&lt; 0.001)</b>  | <b>0.169 (&lt; 0.001)</b>  | <b>0.098 (&lt; 0.001)</b>  | 0.008 (0.496)              | 0.070                      |                           |       |
|                             | $\lambda_{rad}^\dagger$                | <b>0.153 (&lt; 0.001)</b> | <b>0.054 (&lt; 0.001)</b>  | 0.011 (0.371)              | <b>0.067 (&lt; 0.001)</b>  | 0.032 (0.007)              | 0.028                      |                           |       |
|                             | MO                                     | -0.018 (0.115)            |                            | <b>0.157 (&lt; 0.001)</b>  | <b>0.131 (&lt; 0.001)</b>  | -0.009 (0.434)             | 0.041                      |                           |       |
| <u>Thalamic Projections</u> | ATR                                    | $\lambda_{ax}^\dagger$    | <b>0.478 (&lt; 0.001)</b>  | <b>0.115 (&lt; 0.001)</b>  | <b>0.126 (&lt; 0.001)</b>  | <b>-0.076 (&lt; 0.001)</b> | 0.007 (0.532)              | 0.246                     |       |
|                             |                                        | $\lambda_{rad}^\dagger$   | <b>0.468 (&lt; 0.001)</b>  | <b>0.090 (&lt; 0.001)</b>  | <b>0.016 (0.125)</b>       | 0.030 (0.005)              | -0.009 (0.419)             | 0.208                     |       |
|                             |                                        | MO                        | -0.001 (0.924)             |                            | <b>0.085 (&lt; 0.001)</b>  | 0.029 (0.014)              | -0.029 (0.016)             | 0.008                     |       |
|                             | PTR                                    | $\lambda_{ax}^\dagger$    | <b>0.300 (&lt; 0.001)</b>  | <b>0.093 (&lt; 0.001)</b>  | <b>0.139 (&lt; 0.001)</b>  | -0.032 (0.004)             | 0.028 (0.014)              | 0.113                     |       |
|                             |                                        | $\lambda_{rad}^\dagger$   | <b>0.371 (&lt; 0.001)</b>  | <b>0.092 (&lt; 0.001)</b>  | <b>0.066 (&lt; 0.001)</b>  | <b>0.087 (&lt; 0.001)</b>  | <b>0.043 (&lt; 0.001)</b>  | 0.147                     |       |
|                             |                                        | MO <sup>†</sup>           | <b>-0.129 (&lt; 0.001)</b> | -0.028 (0.016)             | <b>0.150 (&lt; 0.001)</b>  | <b>-0.060 (&lt; 0.001)</b> | <b>-0.055 (&lt; 0.001)</b> | 0.041                     |       |
|                             | STR                                    | $\lambda_{ax}^\dagger$    | <b>0.388 (&lt; 0.001)</b>  | <b>0.075 (&lt; 0.001)</b>  | <b>0.087 (0.001)</b>       | <b>-0.061 (&lt; 0.001)</b> | <b>0.038 (&lt; 0.001)</b>  | 0.160                     |       |
|                             |                                        | $\lambda_{rad}^\dagger$   | <b>0.274 (&lt; 0.001)</b>  | 0.035 (0.002)              | <b>-0.121 (&lt; 0.001)</b> | <b>-0.068 (&lt; 0.001)</b> | -0.017 (0.144)             | 0.085                     |       |
|                             |                                        | MO <sup>†</sup>           | <b>0.212 (&lt; 0.001)</b>  | 0.032 (< 0.003)            | <b>0.240 (&lt; 0.001)</b>  | <b>0.166 (&lt; 0.001)</b>  | <b>0.038 (&lt; 0.001)</b>  | 0.137                     |       |
|                             | <u>Motor &amp; Sensory Projections</u> | AR                        | $\lambda_{ax}$             | 0.036 (0.002)              |                            | <b>-0.047 (&lt; 0.001)</b> | <b>-0.103 (&lt; 0.001)</b> | 0.011 (0.335)             | 0.013 |
|                             |                                        |                           | $\lambda_{rad}$            | <b>0.043 (&lt; 0.001)</b>  |                            | <b>-0.135 (&lt; 0.001)</b> | <b>0.147 (&lt; 0.001)</b>  | -0.002 (0.873)            | 0.040 |
|                             |                                        |                           | MO                         | -0.015 (0.202)             |                            | -0.006 (0.588)             | <b>-0.301 (&lt; 0.001)</b> | 0.024 (0.036)             | 0.091 |
|                             |                                        | Corticospinal Tract       | $\lambda_{ax}^\dagger$     | <b>0.099 (&lt; 0.001)</b>  | <b>0.048 (&lt; 0.001)</b>  | <b>0.048 (&lt; 0.001)</b>  | <b>0.138 (&lt; 0.001)</b>  | -0.024 (0.037)            | 0.041 |
|                             |                                        |                           | $\lambda_{rad}$            | <b>0.130 (&lt; 0.001)</b>  |                            | -0.148 (< 0.001)           | <b>0.013 (&lt; 0.001)</b>  | 0.003 (0.779)             | 0.051 |
|                             |                                        |                           | MO                         | 0.014 (0.243)              |                            | <b>0.140 (&lt; 0.001)</b>  | 0.046 (0.001)              | <b>0.067 (&lt; 0.001)</b> | 0.026 |
| MCP                         |                                        | $\lambda_{ax}$            | <b>0.134 (&lt; 0.001)</b>  |                            | <b>0.152 (&lt; 0.001)</b>  | -                          | <b>0.064 (&lt; 0.001)</b>  | 0.048                     |       |
|                             |                                        | $\lambda_{rad}$           | <b>0.150 (&lt; 0.001)</b>  |                            | 0.054 (0.001)              | -                          | <b>0.071 (&lt; 0.001)</b>  | 0.031                     |       |
|                             |                                        | MO                        | 0.012 (0.483)              |                            | <b>0.174 (&lt; 0.001)</b>  | -                          | 0.045 (0.007)              | 0.032                     |       |
| Medial Lemniscus            |                                        | $\lambda_{ax}$            | <b>0.060 (&lt; 0.001)</b>  |                            | 0.034 (0.005)              | 0.020 (0.089)              | <b>0.047 (&lt; 0.001)</b>  | 0.007                     |       |
|                             |                                        | $\lambda_{rad}$           | 0.035 (0.003)              |                            | -0.185 (< 0.001)           | 0.038 (0.001)              | 0.024 (0.044)              | 0.036                     |       |
|                             |                                        | MO <sup>†</sup>           | -0.027 (0.026)             | -0.030 (0.009)             | <b>0.153 (&lt; 0.001)</b>  | <b>0.047 (&lt; 0.001)</b>  | 0.022 (0.069)              | 0.026                     |       |
| <u>Callosal Fibres</u>      |                                        | Forceps Major             | $\lambda_{ax}$             | <b>0.064 (&lt; 0.001)</b>  |                            | <b>0.056 (&lt; 0.001)</b>  | -                          | -0.021 (0.218)            | 0.007 |
|                             |                                        |                           | $\lambda_{rad}^\dagger$    | 0.057 (0.001)              | 0.035 (0.035)              | 0.002 (0.926)              | -                          | -0.015 (0.384)            | 0.003 |
|                             |                                        |                           | MO <sup>†</sup>            | <b>-0.100 (&lt; 0.001)</b> | <b>-0.059 (&lt; 0.001)</b> | <b>0.073 (&lt; 0.001)</b>  | -                          | -0.032 (0.059)            | 0.015 |
|                             | Forceps Minor                          | $\lambda_{ax}^\dagger$    | <b>0.094 (&lt; 0.001)</b>  | 0.046 (0.004)              | 0.074 (< 0.001)            | -                          | 0.009 (0.585)              | 0.015                     |       |
|                             |                                        | $\lambda_{rad}^\dagger$   | 0.226 (< 0.001)            | 0.036 (0.027)              | -0.044 (0.008)             | -                          | -0.006 (0.735)             | 0.048                     |       |
|                             |                                        | MO                        | <b>-0.203 (&lt; 0.001)</b> |                            | -0.020 (0.228)             | -                          | -0.005 (0.772)             | 0.041                     |       |

Note. Standardised  $\beta$ s ( $p$  values) and adjusted  $R^2$  reported. †quadratic model significantly better fit ( $p < 0.05$ ). Bold type indicates significant ( $p < 0.001$ ).  $\lambda_{ax}$  = axial diffusivity,  $\lambda_{rad}$  = radial diffusivity, MO = diffusion tensor mode, AR: acoustic radiation, ATR: anterior thalamic radiation, IFOF: inferior fronto-occipital fasciculus, ILF: inferior longitudinal fasciculus, MCP: middle cerebellar peduncle, PH: parahippocampal portion, PTR: posterior thalamic radiation, SLF: superior longitudinal fasciculus, STR: superior thalamic radiation, FA: fractional anisotropy, MD: mean diffusivity. Female and left hemisphere coded as 0.

Supplementary Table 7. Fit statistics for one-factor models for each of the five white matter measurements. All models included 22 tracts. All models were adjusted for age, age<sup>2</sup> (for all except FA), and sex, include residual covariances between the left and right tracts measured bilaterally and additional residual covariances as indicated by the model modification indices.

| <b>Measure</b>  | <b><math>\chi^2</math></b> | <b>df</b> | <b><i>p</i></b> | <b>RMSEA</b> | <b>CFI</b> | <b>TLI</b> | <b>SRMR</b> |
|-----------------|----------------------------|-----------|-----------------|--------------|------------|------------|-------------|
| FA              | 2719.02                    | 174       | <.001           | 0.065        | 0.964      | 0.943      | 0.031       |
| MD              | 6504.57                    | 176       | <.001           | 0.101        | 0.930      | 0.882      | 0.066       |
| ICVF            | 6781.80                    | 178       | <.001           | 0.103        | 0.952      | 0.920      | 0.031       |
| ISOVF           | 4714.85                    | 178       | <.001           | 0.085        | 0.923      | 0.871      | 0.052       |
| OD              | 3084.41                    | 183       | <.001           | 0.067        | 0.924      | 0.876      | 0.064       |
| $\lambda_{ax}$  | 6083.863                   | 176       | <.001           | 0.098        | 0.917      | 0.859      | 0.068       |
| $\lambda_{rad}$ | 6001.114                   | 182       | <.001           | 0.095        | 0.931      | 0.887      | 0.053       |

Note. FA: fractional anisotropy; MD: mean diffusivity; ICVF: intracellular volume fraction; ISOVF: isotropic volume fraction; OD: orientation dispersion,  $\lambda_{ax}$  = axial diffusivity,  $\lambda_{rad}$  = radial diffusivity. RMSA: Root Mean Square Error of Approximation; CFI: Comparative Fit Index; TLI: Tucker-Lewis Index; SRMR: Standardized Root Mean Square Residual.



Supplementary Table 8. Standardized factor loadings of each white matter tract in the one-factor models.

| Tract         | Standardized factor loading |       |       |       |       |                |                 |
|---------------|-----------------------------|-------|-------|-------|-------|----------------|-----------------|
|               | FA                          | MD    | ICVF  | ISOVF | OD    | $\lambda_{ax}$ | $\lambda_{rad}$ |
| Left AR       | 0.601                       | 0.484 | 0.848 | 0.347 | 0.299 | 0.420          | 0.512           |
| Right AR      | 0.600                       | 0.550 | 0.841 | 0.423 | 0.305 | 0.499          | 0.550           |
| Left ATR      | 0.748                       | 0.698 | 0.825 | 0.561 | 0.655 | 0.695          | 0.694           |
| Right ATR     | 0.736                       | 0.690 | 0.820 | 0.598 | 0.652 | 0.686          | 0.698           |
| Left CingG    | 0.450                       | 0.697 | 0.720 | 0.481 | 0.319 | 0.414          | 0.602           |
| Right CingG   | 0.416                       | 0.694 | 0.724 | 0.558 | 0.296 | 0.429          | 0.590           |
| Left CST      | 0.482                       | 0.586 | 0.774 | 0.350 | 0.184 | 0.414          | 0.558           |
| Right CST     | 0.472                       | 0.606 | 0.754 | 0.431 | 0.210 | 0.429          | 0.564           |
| Forceps Major | 0.555                       | 0.431 | 0.792 | 0.287 | 0.325 | 0.392          | 0.476           |
| Forceps Minor | 0.790                       | 0.739 | 0.881 | 0.599 | 0.554 | 0.673          | 0.736           |
| Left IFOF     | 0.832                       | 0.832 | 0.927 | 0.784 | 0.697 | 0.754          | 0.841           |
| Right IFOF    | 0.831                       | 0.852 | 0.934 | 0.820 | 0.699 | 0.763          | 0.875           |
| Left ILF      | 0.782                       | 0.785 | 0.920 | 0.748 | 0.643 | 0.709          | 0.812           |
| Right ILF     | 0.829                       | 0.833 | 0.931 | 0.812 | 0.641 | 0.743          | 0.848           |
| Left PTR      | 0.591                       | 0.589 | 0.837 | 0.482 | 0.474 | 0.533          | 0.612           |
| Right PTR     | 0.599                       | 0.638 | 0.849 | 0.541 | 0.445 | 0.554          | 0.628           |
| Left SLF      | 0.805                       | 0.853 | 0.906 | 0.738 | 0.469 | 0.745          | 0.837           |
| Right SLF     | 0.816                       | 0.845 | 0.903 | 0.759 | 0.498 | 0.737          | 0.826           |
| Left STR      | 0.597                       | 0.708 | 0.817 | 0.631 | 0.266 | 0.534          | 0.674           |
| Right STR     | 0.568                       | 0.702 | 0.807 | 0.628 | 0.275 | 0.541          | 0.657           |
| Left Unc      | 0.625                       | 0.541 | 0.748 | 0.439 | 0.423 | 0.536          | 0.592           |
| Right Unc     | 0.631                       | 0.652 | 0.793 | 0.574 | 0.447 | 0.623          | 0.664           |

Note. Factor loadings are calculated after controlling for age, age<sup>2</sup> (for all except FA) and sex; note that for many tracts, these loadings changed with age – see the de-differentiation analyses. The models included residual covariances between the left and right tracts measured bilaterally, and additional residual covariances as indicated by the model modification indices. AR: acoustic radiation, ATR: anterior thalamic radiation, IFOF: inferior fronto-occipital fasciculus, ILF: inferior longitudinal fasciculus, MCP: middle cerebellar peduncle, PH: parahippocampal portion, PTR: posterior thalamic radiation, SLF: superior longitudinal fasciculus, STR: superior thalamic radiation, FA: fractional anisotropy, MD: mean diffusivity, ICVF: intra-cellular volume fraction, ISOVF: isotropic volume fraction, OD: orientation dispersion,  $\lambda_{ax}$  = axial diffusivity,  $\lambda_{rad}$  = radial diffusivity.

Supplementary Table 9. Residual covariance paths added to the one-factor models for each white matter structural measure.

| FA             | MD             | ICVF           | ISOVF          | OD             | $\lambda_{ax}$ | $\lambda_{rad}$ |
|----------------|----------------|----------------|----------------|----------------|----------------|-----------------|
| L ILF ↔ L IFOF | R ILF ↔ R IFOF | L ILF ↔ L IFOF | L ILF ↔ L IFOF | L STR ↔ L CST  | L ILF ↔ L IFOF | L ILF ↔ L IFOF  |
| R PTR ↔ R ILF  | R PTR ↔ L ILF  | L PTR ↔ L ILF  | R ILF ↔ R IFOF | R PTR ↔ R ILF  | R STR ↔ R SLF  | R PTR ↔ L ILF   |
| R STR ↔ R CST  | R PTR ↔ R ILF  | R ILF ↔ R IFOF | R PTR ↔ R ILF  | L ILF ↔ L IFOF | R PTR ↔ R ILF  | R PTR ↔ R ILF   |
| L PTR ↔ L ILF  | R STR ↔ R SLF  | L PTR ↔ L IFOF | L PTR ↔ L IFOF | R STR ↔ R CST  | R STR ↔ R CST  | R SLF ↔ L ILF   |
| L PTR ↔ L IFOF | R SLF ↔ L ILF  | R PTR ↔ R ILF  | L PTR ↔ L ILF  | L STR ↔ R CST  | L PTR ↔ L ILF  | L UNC ↔ L ILF   |
| R ILF ↔ R IFOF | L PTR ↔ L ILF  | R STR ↔ RCST   | R STR ↔ R SLF  | R STR ↔ L CST  | L PTR ↔ L IFOF | R STR ↔ R SLF   |
| R PTR ↔ R IFOF | F MIN ↔ F MAJ  | R STR ↔ R SLF  | F MIN ↔ F MAJ  | R ILF ↔ R IFOF | R ILF ↔ R IFOF | F MIN ↔ F MAJ   |
| L PTR ↔ R ILF  | R ILF ↔ L IFOF | L STR ↔ L CST  | L STR ↔ R SLF  | R STR ↔ R SLF  | L UNC ↔ F MIN  | L UNC ↔ L IFOF  |
| L PTR ↔ R IFOF | L PTR ↔ L IFOF | R PTR ↔ F MIN  | L STR ↔ L SLF  | R PTR ↔ R IFOF | R UNC ↔ F MIN  | R PTR ↔ L IFOF  |
| R IFOF ↔ R ATR | R PTR ↔ L IFOF | R PTR ↔ R IFOF | R STR ↔ L SLF  | R STR ↔ R ATR  | R PTR ↔ R IFOF | R ILF ↔ R IFOF  |
| L SLF ↔ L ILF  | L UNC ↔ L IFOF | L STR ↔ R CST  | L IFOF ↔ L ATR | R UNC ↔ R ILF  | R STR ↔ R ATR  | L IFOF ↔ L ATR  |
| L ILF ↔ R IFOF | L UNC ↔ R ILF  | L PTR ↔ F MIN  | R IFOF ↔ R ATR | L STR ↔ R ATR  | R STR ↔ L SLF  | L UNC ↔ R ILF   |
| R PTR ↔ L ILF  | R IFOF ↔ R ATR | R STR ↔ L CST  | R PTR ↔ R IFOF | F MIN ↔ L ATR  | R ILF ↔ L IFOF | R STR ↔ R CST   |
| R ILF ↔ L IFOF | L PTR ↔ R ILF  | R SLF ↔ R CST  | L SLF ↔ L ILF  | L SLF ↔ L CST  | L ILF ↔ R IFOF | L STR ↔ R SLF   |
| R PTR ↔ L IFOF | L SLF ↔ L IFOF | R ILF ↔ F MIN  | L STR ↔ L CST  | F MIN ↔ R ATR  | L STR ↔ L SLF  | R ILF ↔ L IFOF  |
| L ILF ↔ L AR   | R STR ↔ R CST  | L ILF ↔ F MIN  | R STR ↔ R ATR  | L IFOF ↔ L ATR | R PTR ↔ L ILF  | L UNC ↔ R PTR   |
| L STR ↔ R CST  | R UNC ↔ L IFOF | L PTR ↔ R ILF  | L UNC ↔ R STR  | -              | L UNC ↔ L ATR  | L UNC ↔ L PTR   |
| R SLF ↔ L IFOF | R UNC ↔ R ILF  | R PTR ↔ L ILF  | L SLF ↔ L IFOF | -              | L IFOF ↔ L ATR |                 |
| L STR ↔ L CST  | L ILF ↔ L IFOF | R IFOF ↔ L ATR | L UNC ↔ L STR  | -              | R IFOF ↔ R ATR |                 |
| R STR ↔ L CST  | L SLF ↔ L PTR  | R ILF ↔ L IFOF | L SLF ↔ L PTR  | -              | R PTR ↔ L IFOF |                 |
| L STR ↔ L AR   | R STR ↔ R ATR  | R PTR ↔ L IFOF | L UNC ↔ L ATR  | -              | L STR ↔ R SLF  |                 |
| L SLF ↔ L PTR  | R IFOF ↔ F MAJ | -              | -              | -              | L PTR ↔ R ILF  |                 |
| R ILF ↔ F MIN  | -              | -              | -              | -              | L PTR ↔ R IFOF |                 |
| R IFOF ↔ L ATR | -              | -              | -              | -              |                |                 |
| L UNC ↔ L ILF  | -              | -              | -              | -              |                |                 |

Note. L = left hemisphere, R = right hemisphere. AR: acoustic radiation, ATR: anterior thalamic radiation, IFOF: inferior fronto-occipital fasciculus, ILF: inferior longitudinal fasciculus, MCP: middle cerebellar peduncle, PH: parahippocampal portion, PTR: posterior thalamic radiation, SLF: superior longitudinal fasciculus, STR: superior thalamic radiation, FA: fractional anisotropy, MD: mean diffusivity, ICVF: intra-cellular volume fraction, ISOVF: isotropic volume fraction, OD: orientation dispersion,  $\lambda_{ax}$  = axial diffusivity,  $\lambda_{rad}$  = radial diffusivity.

Supplementary Table 10. Regression of the latent (general) factor from each of the five white matter microstructural measures on age and age<sup>2</sup>.

| Latent factor              | Intercept |       |          | Age     |       |          | Age <sup>2</sup> |       |          |
|----------------------------|-----------|-------|----------|---------|-------|----------|------------------|-------|----------|
|                            | $\beta$   | SE    | <i>p</i> | $\beta$ | SE    | <i>p</i> | $\beta$          | SE    | <i>p</i> |
| gFA                        | 0.000     | 0.016 | 0.999    | -0.254  | 0.016 | <0.001   | -                |       | -        |
| gMD                        | -0.071    | 0.022 | 0.001    | 0.368   | 0.016 | <0.001   | 0.071            | 0.015 | <0.001   |
| gICVF                      | 0.050     | 0.023 | 0.026    | -0.265  | 0.017 | <0.001   | -0.051           | 0.016 | 0.001    |
| gISOVF                     | -0.046    | 0.023 | 0.044    | 0.273   | 0.016 | <0.001   | 0.046            | 0.016 | 0.004    |
| gOD                        | 0.068     | 0.023 | 0.004    | -0.120  | 0.017 | <0.001   | -0.068           | 0.017 | <0.001   |
| g $\lambda$ <sub>ax</sub>  | -0.088    | 0.022 | <.001    | 0.341   | 0.016 | <0.001   | 0.088            | 0.016 | <0.001   |
| g $\lambda$ <sub>rad</sub> | -0.065    | 0.015 | 0.003    | 0.363   | 0.016 | <0.001   | 0.065            | 0.015 | <0.001   |

Note. The values below correspond to the trajectories shown in Figure 6 (left panel). A model regressing the latent FA factor on age (Akaike Information Criterion = 9740.60; Bayesian Information Criterion = 9765.25) had fit that was not significantly different from a model that included both age and age<sup>2</sup> (AIC = 9739.86; BIC = 9758.35):  $F(1) = 1.26$ ,  $p = 0.26$ . For all other models, the models including age<sup>2</sup> provided significantly better fit (all  $p < 0.004$ ).

Supplementary Table 11. Relative model fit indices for each of the common, independent, and common + independent age pathway models.

| Measure                | Model                | $\chi^2$ | df  | AIC        | BIC        | $p_{\text{diff}}$ |
|------------------------|----------------------|----------|-----|------------|------------|-------------------|
| FA                     | Common               | 3389.12  | 195 | -85492.07  | -84863.32  | -                 |
|                        | Independent          | 2855.94  | 174 | -85983.25  | -85225.05  | <0.0001           |
|                        | Common + Independent | 2898.43  | 181 | -85954.76  | -85239.71  | <0.0001           |
| MD                     | Common               | 9767.09  | 219 | -36176.97  | -35560.55  | -                 |
|                        | Independent          | 8437.64  | 177 | -37422.42  | -36547.10  | <0.0001           |
|                        | Common + Independent | 8442.18  | 181 | -37425.87  | -36575.21  | 0.338             |
| ICVF                   | Common               | 8385.93  | 220 | 257503.04  | 258113.30  | -                 |
|                        | Independent          | 7205.96  | 178 | 256407.07  | 257276.23  | <0.0001           |
|                        | Common + Independent | 7219.76  | 186 | 256404.88  | 257224.72  | 0.087             |
| ISOVF                  | Common               | 5918.98  | 220 | 222396.66  | 223006.92  | -                 |
|                        | Independent          | 4659.73  | 178 | 221221.41  | 222090.57  | <0.0001           |
|                        | Common + Independent | 4669.02  | 188 | 221210.70  | 222018.21  | 0.505             |
| OD                     | Common               | 3949.20  | 225 | -137318.74 | -136739.31 | -                 |
|                        | Independent          | 3764.84  | 207 | -132794.00 | -131936.62 | <0.0001           |
|                        | Common + Independent | 3052.50  | 193 | -138151.45 | -137374.76 | <0.0001           |
| $\lambda_{\text{ax}}$  | Common               | 7535.40  | 218 | 15457.67   | 16080.26   | -                 |
|                        | Independent          | 6094.01  | 176 | 14100.28   | 14981.77   | <0.0001           |
|                        | Common + Independent | 6100.60  | 182 | 14094.87   | 14939.37   | 0.360             |
| $\lambda_{\text{rad}}$ | Common               | 7311.37  | 224 | 38354.49   | 38940.09   | -                 |
|                        | Independent          | 6240.41  | 182 | 37367.53   | 38212.03   | <0.0001           |
|                        | Common + Independent | 6253.29  | 194 | 37356.41   | 38126.94   | 0.378             |

Note. Degrees of freedom differ due to the residual paths being included in the models. These residual paths were identical to those included in the age-moderation models described above. Values for  $p_{\text{diff}}$  refer to the difference ( $\chi^2$  test) between the model and the model in the row above. AIC: Akaike Information Criterion, BIC: Bayesian Information Criterion. -

Supplementary Table 12. Mediation analysis of age effects on FA by ICVF and OD.

|                                    |       | $\beta$ | $p$    | SE    |
|------------------------------------|-------|---------|--------|-------|
| <b><u>Regressions</u></b>          |       |         |        |       |
| gFA                                |       |         |        |       |
|                                    | age   | -0.060  | <0.001 | 0.006 |
|                                    | gICVF | 0.925   | <0.001 | 0.006 |
|                                    | gOD   | -0.464  | <0.001 | 0.007 |
| gICVF                              | age   | -0.251  | <0.001 | 0.016 |
| gOD                                | age   | -0.095  | <0.001 | 0.015 |
| <b><u>Covariances</u></b>          |       |         |        |       |
| gICVF                              | gOD   | 0.239   | <0.001 | 0.015 |
| <b><u>Mediation Parameters</u></b> |       |         |        |       |
| gICVF                              | IDE   | -0.232  | <0.001 | 0.015 |
| gOD                                | IDE   | 0.044   | <0.001 | 0.007 |
| sum                                | IDE   | -0.188  | <0.001 | 0.015 |
| total                              |       | -0.247  | <0.001 | 0.016 |

Note. Standardised betas reported, IDE = indirect effects, SE = standard error, gFA = general factor of fractional anisotropy, gICVF = general factor of intracellular volume fraction, gOD = general factor of orientation dispersion.

Supplementary Table 13. Descriptive statistics and regression models of age and sex on brain volumetric indices.

|                                    | Mean (SD)                     | Age                        | Age <sup>2</sup>           | Sex                        | Sex*Age                   | R <sup>2</sup> |
|------------------------------------|-------------------------------|----------------------------|----------------------------|----------------------------|---------------------------|----------------|
| Total Brain Volume <sup>†</sup>    | <b>1174150.00 (111919.80)</b> | <b>-0.579 (&lt; 0.001)</b> | -0.031 (0.026)             | <b>-0.121 (&lt; 0.001)</b> | <b>0.101 (&lt; 0.001)</b> | 0.299          |
| Grey Matter Volume <sup>†</sup>    | <b>621076.8 (55761.55)</b>    | <b>-0.615 (&lt; 0.001)</b> | -0.033 (0.009)             | <b>-0.302 (&lt; 0.001)</b> | <b>0.117 (&lt; 0.001)</b> | 0.423          |
| White Matter Volume                | <b>553073.30 (62228.07)</b>   | <b>-0.307 (&lt; 0.001)</b> | -                          | <b>0.135 (&lt; 0.001)</b>  | 0.040 (0.212)             | 0.094          |
| Left Hippocampal V. <sup>†</sup>   | <b>3827.15 (467.02)</b>       | <b>-0.223 (&lt; 0.001)</b> | -0.038 (0.015)             | <b>-0.249 (&lt; 0.001)</b> | -0.037 (0.251)            | 0.125          |
| Right Hippocampal V. <sup>†</sup>  | <b>3937.95 (481.12)</b>       | <b>-0.204 (&lt; 0.001)</b> | <b>-0.069 (&lt; 0.001)</b> | <b>-0.230 (&lt; 0.001)</b> | -0.063 (0.050)            | 0.113          |
| Left Thalamus Volume               | <b>7824.38 (754.81)</b>       | <b>-0.399 (&lt; 0.001)</b> | -                          | <b>-0.231 (&lt; 0.001)</b> | -0.003 (0.834)            | 0.222          |
| Right Thalamus Volume <sup>†</sup> | <b>7629.53 (729.26)</b>       | <b>-0.415 (&lt; 0.001)</b> | <b>-0.032 (&lt; 0.001)</b> | <b>-0.221 (&lt; 0.001)</b> | 0.001 (0.9402)            | 0.229          |

Note. Mean and SD are of raw (unscaled) volumes (mm<sup>3</sup>), regression models are corrected for head size. Standardised  $\beta$ s ( $p$  values) and adjusted  $R^2$  reported. <sup>†</sup>quadratic model significantly better fit ( $p < 0.05$ ). Bold type indicates significant effect ( $p < 0.001$ ). Female coded as 0. All variables corrected for head size. Hippocampal volume is the average of left and right.



Supplementary Table 14. Correlation matrix among brain diffusion factor scores and volumetric measures.

|                            | <b>gFA</b>          | <b>gMD</b> | <b>gICVF</b> | <b>gISOVF</b> | <b>gOD</b>         | <b>g<math>\lambda</math><sub>ax</sub></b> | <b>g<math>\lambda</math><sub>rad</sub></b> | <b>TBV</b> | <b>GMV</b> | <b>WMV</b> | <b>IHCV</b> | <b>rHCV</b> | <b>LThalV</b> | <b>RThalV</b> |
|----------------------------|---------------------|------------|--------------|---------------|--------------------|-------------------------------------------|--------------------------------------------|------------|------------|------------|-------------|-------------|---------------|---------------|
| gFA                        |                     |            |              |               |                    |                                           |                                            |            |            |            |             |             |               |               |
| gMD                        | -0.782              |            |              |               |                    |                                           |                                            |            |            |            |             |             |               |               |
| gICVF                      | 0.833               | -0.871     |              |               |                    |                                           |                                            |            |            |            |             |             |               |               |
| gISOVF                     | -0.039 <sup>†</sup> | 0.334      | 0.149        |               |                    |                                           |                                            |            |            |            |             |             |               |               |
| gOD                        | 0.158               | 0.386      | -0.289       | 0.133         |                    |                                           |                                            |            |            |            |             |             |               |               |
| g $\lambda$ <sub>ax</sub>  | -0.486              | 0.901      | -0.715       | 0.402         | 0.682              |                                           |                                            |            |            |            |             |             |               |               |
| g $\lambda$ <sub>rad</sub> | -0.886              | 0.973      | -0.889       | 0.276         | 0.205              | 0.800                                     |                                            |            |            |            |             |             |               |               |
| TBV                        | 0.166               | -0.276     | 0.222        | -0.182        | -0.083             | -0.251                                    | -0.269                                     |            |            |            |             |             |               |               |
| GM                         | 0.201               | -0.311     | 0.238        | -0.229        | -0.152             | -0.279                                    | -0.305                                     | 0.847      |            |            |             |             |               |               |
| WM                         | 0.062               | -0.128     | 0.117        | -0.058        | 0.029 <sup>†</sup> | -0.121                                    | -0.123                                     | 0.789      | 0.341      |            |             |             |               |               |
| IHCV                       | 0.022 <sup>†</sup>  | -0.169     | 0.106        | -0.153        | -0.152             | -0.176                                    | -0.145                                     | 0.374      | 0.410      | 0.189      |             |             |               |               |
| rHCV                       | 0.031 <sup>†</sup>  | -0.171     | 0.103        | -0.161        | -0.132             | -0.175                                    | -0.147                                     | 0.376      | 0.390      | 0.214      | 0.620       |             |               |               |
| LThalV                     | 0.081               | -0.246     | 0.193        | -0.155        | -0.154             | -0.242                                    | -0.226                                     | 0.645      | 0.591      | 0.458      | 0.541       | 0.476       |               |               |
| RThalV                     | 0.091               | -0.262     | 0.199        | -0.173        | -0.162             | -0.259                                    | -0.241                                     | 0.660      | 0.609      | 0.463      | 0.496       | 0.539       | 0.916         |               |
| Age                        | -0.254              | 0.351      | -0.252       | 0.263         | 0.104              | 0.320                                     | 0.347                                      | -0.531     | -0.573     | -0.277     | -0.250      | -0.234      | -0.411        | -0.424        |

Note. Pearson's  $r$  reported. <sup>†</sup>not significant at  $p < 0.001$ . Volumetric measures are corrected for head size.

Supplementary Table 15. Regression models in training and test halves of the full sample following elastic net regression results for MRI predictors of age variance.

|                    | <u>Training Set (n = 1756)</u> |         | <u>Test Set (n = 1757)</u> |         |
|--------------------|--------------------------------|---------|----------------------------|---------|
|                    | $\beta$                        | $P$     | $\beta$                    | $P$     |
| gFA                | -0.085                         | 0.012   | -0.071                     | 0.035   |
| gMD                | 0.085                          | 0.019   | 0.109                      | 0.003   |
| gISOVF             | 0.119                          | < 0.001 | 0.124                      | < 0.001 |
| Total Brain Volume | -0.160                         | < 0.001 | -0.171                     | < 0.001 |
| Grey Matter Volume | -0.375                         | < 0.001 | -0.348                     | < 0.001 |

Note. Standardised  $\beta$ s and  $p$  values reported. Adjusted  $R^2$  for Training Set = 0.376 and Test Set = 0.377. Training and Test sets did not differ significantly by mean age ( $t(3510.8) = -0.803, p = 0.422$ ) or age variance ( $F(1755) = 0.983, p = 0.723$ ). Variance inflation factors all < 3.84.

Supplementary Table 16. Regression models for thalamic radiation microstructure and thalamic volume as predictors of age variance beyond general brain atrophy.

|       | <b>Loadings (%var)</b> | <b>gTR</b>                 | <b>Thalamus</b>            | <b>TBV</b>                 | <b>R<sup>2</sup></b> | <b>VIF</b> |
|-------|------------------------|----------------------------|----------------------------|----------------------------|----------------------|------------|
| FA    | <b>≥0.794 (67.5%)</b>  | <b>-0.141 (&lt; 0.001)</b> | <b>-0.300 (&lt; 0.001)</b> | -                          | 0.129                | ≤1.05      |
|       |                        | <b>-0.120 (&lt; 0.001)</b> | <b>-0.153 (&lt; 0.001)</b> | <b>-0.468 (&lt; 0.001)</b> | 0.324                | ≤1.16      |
| MD    | <b>≥0.856 (78.5%)</b>  | <b>0.403 (&lt; 0.001)</b>  | <b>-0.248 (&lt; 0.001)</b> | -                          | 0.265                | ≤1.05      |
|       |                        | <b>0.212 (&lt; 0.001)</b>  | <b>-0.151 (&lt; 0.001)</b> | <b>-0.378 (&lt; 0.001)</b> | 0.379                | ≤1.25      |
| ICVF  | <b>≥0.907 (86.7%)</b>  | <b>-0.258 (&lt; 0.001)</b> | <b>-0.291 (&lt; 0.001)</b> | -                          | 0.175                | ≤1.03      |
|       |                        | <b>-0.161 (&lt; 0.001)</b> | <b>-0.165 (&lt; 0.001)</b> | <b>-0.435 (&lt; 0.001)</b> | 0.335                | ≤1.18      |
| ISOVF | <b>≥0.768 (67.0%)</b>  | <b>0.333 (&lt; 0.001)</b>  | <b>-0.280 (&lt; 0.001)</b> | -                          | 0.218                | ≤1.03      |
|       |                        | <b>0.229 (&lt; 0.001)</b>  | <b>-0.163 (&lt; 0.001)</b> | <b>0.410 (&lt; 0.001)</b>  | 0.358                | ≤1.20      |
| OD    | <b>≥0.666 (54.1%)</b>  | <b>-0.342 (&lt; 0.001)</b> | <b>-0.392 (&lt; 0.001)</b> | -                          | 0.224                | ≤1.03      |
|       |                        | <b>-0.227 (&lt; 0.001)</b> | <b>-0.242 (&lt; 0.001)</b> | <b>-0.403 (&lt; 0.001)</b> | 0.356                | ≤1.22      |

Note. Standardised  $\beta$ s ( $p$  values) and adjusted  $R^2$  reported. Loadings (%var) = loadings and percentage of variance explained by the first unrotated solution of a principal component analysis of the three thalamic radiations, gTR = general measure of thalamic radiation microstructure, TBV = total brain volume. Bold type indicates significant effect ( $p < 0.001$ ). Volumes corrected for head size.

Supplementary Table 17. Statistical significance tests for  $\lambda_1$  and  $\lambda_1'$  parameters (main effects and age moderation effects of general factors) in the dedifferentiation models for FA, MD, ICVF, ISOVF and OD (Equation S2 specification).

| Tract         | Parameter    | FA           |              |                  | MD           |              |                  | ICVF         |              |                  | ISOVF         |              |                  | OD            |              |                  |
|---------------|--------------|--------------|--------------|------------------|--------------|--------------|------------------|--------------|--------------|------------------|---------------|--------------|------------------|---------------|--------------|------------------|
|               |              | Est.         | SE           | <i>p</i>         | Est.         | SE           | <i>p</i>         | Est.         | SE           | <i>p</i>         | Est.          | SE           | <i>p</i>         | Est.          | SE           | <i>p</i>         |
| Left AR       | $\lambda_1$  | <b>1.271</b> | <b>0.088</b> | <b>&lt;0.001</b> | <b>0.164</b> | <b>0.016</b> | <b>&lt;0.001</b> | <b>2.152</b> | <b>0.092</b> | <b>&lt;0.001</b> | <b>0.802</b>  | <b>0.094</b> | <b>&lt;0.001</b> | <b>0.542</b>  | <b>0.073</b> | <b>&lt;0.001</b> |
|               | $\lambda_1'$ | 0.024        | 0.046        | 0.607            | 0.089        | 0.082        | 0.276            | <b>0.103</b> | <b>0.049</b> | <b>0.036</b>     | -0.039        | 0.048        | 0.416            | -0.032        | 0.038        | 0.398            |
| Right AR      | $\lambda_1$  | <b>1.252</b> | <b>0.082</b> | <b>&lt;0.001</b> | <b>0.163</b> | <b>0.014</b> | <b>&lt;0.001</b> | <b>2.024</b> | <b>0.090</b> | <b>&lt;0.001</b> | <b>0.727</b>  | <b>0.081</b> | <b>&lt;0.001</b> | <b>0.685</b>  | <b>0.068</b> | <b>&lt;0.001</b> |
|               | $\lambda_1'$ | 0.017        | 0.043        | 0.692            | <b>0.199</b> | <b>0.075</b> | <b>0.008</b>     | <b>0.154</b> | <b>0.049</b> | <b>0.002</b>     | 0.043         | 0.042        | 0.306            | <b>-0.122</b> | <b>0.036</b> | <b>0.001</b>     |
| Left ATR      | $\lambda_1$  | <b>1.100</b> | <b>0.061</b> | <b>&lt;0.001</b> | <b>0.122</b> | <b>0.009</b> | <b>&lt;0.001</b> | <b>1.944</b> | <b>0.086</b> | <b>&lt;0.001</b> | <b>0.375</b>  | <b>0.041</b> | <b>&lt;0.001</b> | <b>0.730</b>  | <b>0.043</b> | <b>&lt;0.001</b> |
|               | $\lambda_1'$ | <b>0.148</b> | <b>0.033</b> | <b>&lt;0.001</b> | <b>0.621</b> | <b>0.050</b> | <b>&lt;0.001</b> | <b>0.257</b> | <b>0.047</b> | <b>&lt;0.001</b> | <b>0.166</b>  | <b>0.022</b> | <b>&lt;0.001</b> | -0.008        | 0.022        | 0.728            |
| Right ATR     | $\lambda_1$  | <b>1.041</b> | <b>0.060</b> | <b>&lt;0.001</b> | <b>0.127</b> | <b>0.009</b> | <b>&lt;0.001</b> | <b>1.940</b> | <b>0.086</b> | <b>&lt;0.001</b> | <b>0.426</b>  | <b>0.039</b> | <b>&lt;0.001</b> | <b>0.788</b>  | <b>0.044</b> | <b>&lt;0.001</b> |
|               | $\lambda_1'$ | <b>0.143</b> | <b>0.032</b> | <b>&lt;0.001</b> | <b>0.602</b> | <b>0.049</b> | <b>&lt;0.001</b> | <b>0.249</b> | <b>0.047</b> | <b>&lt;0.001</b> | <b>0.161</b>  | <b>0.022</b> | <b>&lt;0.001</b> | -0.011        | 0.023        | 0.623            |
| Left CingG    | $\lambda_1$  | <b>1.470</b> | <b>0.134</b> | <b>&lt;0.001</b> | <b>0.186</b> | <b>0.010</b> | <b>&lt;0.001</b> | <b>2.383</b> | <b>0.123</b> | <b>&lt;0.001</b> | <b>0.767</b>  | <b>0.060</b> | <b>&lt;0.001</b> | <b>0.536</b>  | <b>0.075</b> | <b>&lt;0.001</b> |
|               | $\lambda_1'$ | 0.026        | 0.071        | 0.711            | 0.035        | 0.051        | 0.493            | 0.076        | 0.065        | 0.247            | -0.023        | 0.032        | 0.467            | 0.015         | 0.041        | 0.715            |
| Right CingG   | $\lambda_1$  | <b>1.163</b> | <b>0.137</b> | <b>&lt;0.001</b> | <b>0.182</b> | <b>0.010</b> | <b>&lt;0.001</b> | <b>2.203</b> | <b>0.117</b> | <b>&lt;0.001</b> | <b>0.874</b>  | <b>0.056</b> | <b>&lt;0.001</b> | <b>0.504</b>  | <b>0.086</b> | <b>&lt;0.001</b> |
|               | $\lambda_1'$ | 0.112        | 0.072        | 0.118            | 0.057        | 0.051        | 0.262            | 0.092        | 0.062        | 0.139            | <b>-0.060</b> | <b>0.029</b> | <b>0.039</b>     | 0.041         | 0.046        | 0.371            |
| Left CST      | $\lambda_1$  | <b>1.009</b> | <b>0.090</b> | <b>&lt;0.001</b> | <b>0.111</b> | <b>0.009</b> | <b>&lt;0.001</b> | <b>1.544</b> | <b>0.080</b> | <b>&lt;0.001</b> | <b>0.390</b>  | <b>0.057</b> | <b>&lt;0.001</b> | <b>0.331</b>  | <b>0.061</b> | <b>&lt;0.001</b> |
|               | $\lambda_1'$ | 0.026        | 0.047        | 0.582            | <b>0.154</b> | <b>0.046</b> | <b>0.001</b>     | <b>0.129</b> | <b>0.043</b> | <b>0.003</b>     | 0.047         | 0.030        | 0.118            | -0.045        | 0.032        | 0.160            |
| Right CST     | $\lambda_1$  | <b>1.067</b> | <b>0.092</b> | <b>&lt;0.001</b> | <b>0.124</b> | <b>0.009</b> | <b>&lt;0.001</b> | <b>1.492</b> | <b>0.081</b> | <b>&lt;0.001</b> | <b>0.523</b>  | <b>0.055</b> | <b>&lt;0.001</b> | <b>0.337</b>  | <b>0.059</b> | <b>&lt;0.001</b> |
|               | $\lambda_1'$ | -0.001       | 0.048        | 0.986            | <b>0.115</b> | <b>0.046</b> | <b>0.013</b>     | <b>0.146</b> | <b>0.043</b> | <b>0.001</b>     | 0.032         | 0.029        | 0.267            | -0.031        | 0.031        | 0.308            |
| Forceps Major | $\lambda_1$  | <b>1.195</b> | <b>0.103</b> | <b>&lt;0.001</b> | <b>0.163</b> | <b>0.020</b> | <b>&lt;0.001</b> | <b>2.130</b> | <b>0.102</b> | <b>&lt;0.001</b> | <b>0.440</b>  | <b>0.111</b> | <b>&lt;0.001</b> | <b>0.346</b>  | <b>0.044</b> | <b>&lt;0.001</b> |
|               | $\lambda_1'$ | <b>0.141</b> | <b>0.055</b> | <b>0.011</b>     | <b>0.273</b> | <b>0.107</b> | <b>0.011</b>     | <b>0.151</b> | <b>0.056</b> | <b>0.007</b>     | <b>0.160</b>  | <b>0.058</b> | <b>0.006</b>     | -0.008        | 0.023        | 0.718            |
| Forceps Minor | $\lambda_1$  | <b>1.357</b> | <b>0.069</b> | <b>&lt;0.001</b> | <b>0.201</b> | <b>0.011</b> | <b>&lt;0.001</b> | <b>2.910</b> | <b>0.111</b> | <b>&lt;0.001</b> | <b>0.954</b>  | <b>0.066</b> | <b>&lt;0.001</b> | <b>0.588</b>  | <b>0.042</b> | <b>&lt;0.001</b> |
|               | $\lambda_1'$ | <b>0.160</b> | <b>0.037</b> | <b>&lt;0.001</b> | <b>0.310</b> | <b>0.061</b> | <b>&lt;0.001</b> | <b>0.129</b> | <b>0.059</b> | <b>0.029</b>     | 0.032         | 0.035        | 0.364            | -0.010        | 0.022        | 0.649            |
| Left IFOF     | $\lambda_1$  | <b>1.507</b> | <b>0.069</b> | <b>&lt;0.001</b> | <b>0.171</b> | <b>0.009</b> | <b>&lt;0.001</b> | <b>2.601</b> | <b>0.094</b> | <b>&lt;0.001</b> | <b>0.618</b>  | <b>0.037</b> | <b>&lt;0.001</b> | <b>0.698</b>  | <b>0.040</b> | <b>&lt;0.001</b> |
|               | $\lambda_1'$ | <b>0.153</b> | <b>0.037</b> | <b>&lt;0.001</b> | <b>0.435</b> | <b>0.049</b> | <b>&lt;0.001</b> | <b>0.207</b> | <b>0.051</b> | <b>&lt;0.001</b> | <b>0.151</b>  | <b>0.020</b> | <b>&lt;0.001</b> | 0.005         | 0.021        | 0.826            |
| Right IFOF    | $\lambda_1$  | <b>1.366</b> | <b>0.066</b> | <b>&lt;0.001</b> | <b>0.203</b> | <b>0.009</b> | <b>&lt;0.001</b> | <b>2.760</b> | <b>0.098</b> | <b>&lt;0.001</b> | <b>0.728</b>  | <b>0.038</b> | <b>&lt;0.001</b> | <b>0.681</b>  | <b>0.038</b> | <b>&lt;0.001</b> |
|               | $\lambda_1'$ | <b>0.165</b> | <b>0.036</b> | <b>&lt;0.001</b> | <b>0.327</b> | <b>0.049</b> | <b>&lt;0.001</b> | <b>0.180</b> | <b>0.053</b> | <b>0.001</b>     | <b>0.146</b>  | <b>0.021</b> | <b>&lt;0.001</b> | 0.004         | 0.020        | 0.843            |
| Left ILF      | $\lambda_1$  | <b>1.315</b> | <b>0.067</b> | <b>&lt;0.001</b> | <b>0.167</b> | <b>0.010</b> | <b>&lt;0.001</b> | <b>2.452</b> | <b>0.092</b> | <b>&lt;0.001</b> | <b>0.582</b>  | <b>0.040</b> | <b>&lt;0.001</b> | <b>0.524</b>  | <b>0.033</b> | <b>&lt;0.001</b> |
|               | $\lambda_1'$ | <b>0.132</b> | <b>0.036</b> | <b>&lt;0.001</b> | <b>0.416</b> | <b>0.054</b> | <b>&lt;0.001</b> | <b>0.210</b> | <b>0.050</b> | <b>&lt;0.001</b> | <b>0.177</b>  | <b>0.022</b> | <b>&lt;0.001</b> | 0.006         | 0.018        | 0.728            |
| Right ILF     | $\lambda_1$  | <b>1.317</b> | <b>0.062</b> | <b>&lt;0.001</b> | <b>0.195</b> | <b>0.009</b> | <b>&lt;0.001</b> | <b>2.556</b> | <b>0.093</b> | <b>&lt;0.001</b> | <b>0.766</b>  | <b>0.039</b> | <b>&lt;0.001</b> | <b>0.458</b>  | <b>0.032</b> | <b>&lt;0.001</b> |
|               | $\lambda_1'$ | <b>0.130</b> | <b>0.033</b> | <b>&lt;0.001</b> | <b>0.319</b> | <b>0.051</b> | <b>&lt;0.001</b> | <b>0.181</b> | <b>0.050</b> | <b>&lt;0.001</b> | <b>0.140</b>  | <b>0.022</b> | <b>&lt;0.001</b> | 0.030         | 0.017        | 0.070            |
| Left PTR      | $\lambda_1$  | <b>0.910</b> | <b>0.076</b> | <b>&lt;0.001</b> | <b>0.155</b> | <b>0.013</b> | <b>&lt;0.001</b> | <b>2.074</b> | <b>0.093</b> | <b>&lt;0.001</b> | <b>0.756</b>  | <b>0.076</b> | <b>&lt;0.001</b> | <b>0.375</b>  | <b>0.041</b> | <b>&lt;0.001</b> |
|               | $\lambda_1'$ | <b>0.160</b> | <b>0.041</b> | <b>&lt;0.001</b> | <b>0.475</b> | <b>0.071</b> | <b>&lt;0.001</b> | <b>0.221</b> | <b>0.050</b> | <b>&lt;0.001</b> | <b>0.132</b>  | <b>0.042</b> | <b>0.001</b>     | <b>0.043</b>  | <b>0.021</b> | <b>0.044</b>     |
| Right PTR     | $\lambda_1$  | <b>0.927</b> | <b>0.076</b> | <b>&lt;0.001</b> | <b>0.180</b> | <b>0.012</b> | <b>&lt;0.001</b> | <b>2.214</b> | <b>0.096</b> | <b>&lt;0.001</b> | <b>0.866</b>  | <b>0.073</b> | <b>&lt;0.001</b> | <b>0.339</b>  | <b>0.041</b> | <b>&lt;0.001</b> |
|               | $\lambda_1'$ | <b>0.142</b> | <b>0.041</b> | <b>&lt;0.001</b> | <b>0.389</b> | <b>0.067</b> | <b>&lt;0.001</b> | <b>0.197</b> | <b>0.052</b> | <b>&lt;0.001</b> | <b>0.126</b>  | <b>0.040</b> | <b>0.002</b>     | <b>0.059</b>  | <b>0.022</b> | <b>0.007</b>     |
| Left SLF      | $\lambda_1$  | <b>1.391</b> | <b>0.071</b> | <b>&lt;0.001</b> | <b>0.183</b> | <b>0.008</b> | <b>&lt;0.001</b> | <b>2.633</b> | <b>0.102</b> | <b>&lt;0.001</b> | <b>0.684</b>  | <b>0.044</b> | <b>&lt;0.001</b> | <b>0.563</b>  | <b>0.050</b> | <b>&lt;0.001</b> |
|               | $\lambda_1'$ | <b>0.168</b> | <b>0.038</b> | <b>&lt;0.001</b> | <b>0.404</b> | <b>0.046</b> | <b>&lt;0.001</b> | <b>0.248</b> | <b>0.055</b> | <b>&lt;0.001</b> | <b>0.160</b>  | <b>0.024</b> | <b>&lt;0.001</b> | -0.011        | 0.026        | 0.685            |
| Right SLF     | $\lambda_1$  | <b>1.343</b> | <b>0.067</b> | <b>&lt;0.001</b> | <b>0.186</b> | <b>0.008</b> | <b>&lt;0.001</b> | <b>2.576</b> | <b>0.103</b> | <b>&lt;0.001</b> | <b>0.844</b>  | <b>0.046</b> | <b>&lt;0.001</b> | <b>0.624</b>  | <b>0.051</b> | <b>&lt;0.001</b> |
|               | $\lambda_1'$ | <b>0.168</b> | <b>0.036</b> | <b>&lt;0.001</b> | <b>0.396</b> | <b>0.047</b> | <b>&lt;0.001</b> | <b>0.260</b> | <b>0.056</b> | <b>&lt;0.001</b> | <b>0.123</b>  | <b>0.025</b> | <b>&lt;0.001</b> | -0.019        | 0.027        | 0.484            |
| Left STR      | $\lambda_1$  | <b>0.712</b> | <b>0.067</b> | <b>&lt;0.001</b> | <b>0.136</b> | <b>0.008</b> | <b>&lt;0.001</b> | <b>1.661</b> | <b>0.082</b> | <b>&lt;0.001</b> | <b>0.593</b>  | <b>0.044</b> | <b>&lt;0.001</b> | <b>0.385</b>  | <b>0.061</b> | <b>&lt;0.001</b> |
|               | $\lambda_1'$ | <b>0.199</b> | <b>0.036</b> | <b>&lt;0.001</b> | <b>0.366</b> | <b>0.046</b> | <b>&lt;0.001</b> | <b>0.269</b> | <b>0.045</b> | <b>&lt;0.001</b> | <b>0.110</b>  | <b>0.024</b> | <b>&lt;0.001</b> | 0.008         | 0.033        | 0.799            |
| Right STR     | $\lambda_1$  | <b>0.700</b> | <b>0.071</b> | <b>&lt;0.001</b> | <b>0.153</b> | <b>0.009</b> | <b>&lt;0.001</b> | <b>1.699</b> | <b>0.084</b> | <b>&lt;0.001</b> | <b>0.648</b>  | <b>0.047</b> | <b>&lt;0.001</b> | <b>0.423</b>  | <b>0.063</b> | <b>&lt;0.001</b> |
|               | $\lambda_1'$ | <b>0.189</b> | <b>0.038</b> | <b>&lt;0.001</b> | <b>0.288</b> | <b>0.048</b> | <b>&lt;0.001</b> | <b>0.244</b> | <b>0.046</b> | <b>&lt;0.001</b> | <b>0.096</b>  | <b>0.025</b> | <b>&lt;0.001</b> | -0.004        | 0.033        | 0.906            |
| Left Unc      | $\lambda_1$  | <b>1.456</b> | <b>0.090</b> | <b>&lt;0.001</b> | <b>0.146</b> | <b>0.014</b> | <b>&lt;0.001</b> | <b>2.027</b> | <b>0.101</b> | <b>&lt;0.001</b> | <b>0.253</b>  | <b>0.042</b> | <b>&lt;0.001</b> | <b>0.677</b>  | <b>0.069</b> | <b>&lt;0.001</b> |
|               | $\lambda_1'$ | 0.018        | 0.048        | 0.704            | <b>0.262</b> | <b>0.071</b> | <b>&lt;0.001</b> | 0.075        | 0.053        | 0.159            | <b>0.122</b>  | <b>0.023</b> | <b>&lt;0.001</b> | -0.003        | 0.036        | 0.939            |
| Right Unc     | $\lambda_1$  | <b>1.166</b> | <b>0.076</b> | <b>&lt;0.001</b> | <b>0.154</b> | <b>0.011</b> | <b>&lt;0.001</b> | <b>1.961</b> | <b>0.089</b> | <b>&lt;0.001</b> | <b>0.408</b>  | <b>0.037</b> | <b>&lt;0.001</b> | <b>0.628</b>  | <b>0.063</b> | <b>&lt;0.001</b> |
|               | $\lambda_1'$ | 0.062        | 0.040        | 0.124            | <b>0.256</b> | <b>0.058</b> | <b>&lt;0.001</b> | 0.094        | 0.048        | 0.050            | <b>0.097</b>  | <b>0.020</b> | <b>&lt;0.001</b> | 0.021         | 0.034        | 0.525            |

Note. All estimates are unstandardized. Parameters that were statistically significantly different from zero are in bold. These figures correspond to the trends shown in the leftmost panels of Figures S8-S12.

Supplementary Table 18. Statistical significance tests for  $\lambda_1$  and  $\lambda_1'$  parameters (main effects and age moderation effects of general factors) in the dedifferentiation models for  $\lambda_{ax}$  and  $\lambda_{rad}$  (Equation S2 specification).

| Tract         | Parameter    | $\lambda_{ax}$ |              |                  | $\lambda_{rad}$ |              |                  |
|---------------|--------------|----------------|--------------|------------------|-----------------|--------------|------------------|
|               |              | Est.           | SE           | $p$              | Est.            | SE           | $p$              |
| Left AR       | $\lambda_1$  | <b>0.185</b>   | <b>0.020</b> | <b>&lt;0.001</b> | <b>0.269</b>    | <b>0.023</b> | <b>&lt;0.001</b> |
|               | $\lambda_1'$ | 0.006          | 0.010        | 0.545            | 0.014           | 0.012        | 0.258            |
| Right AR      | $\lambda_1$  | <b>0.186</b>   | <b>0.017</b> | <b>&lt;0.001</b> | <b>0.259</b>    | <b>0.022</b> | <b>&lt;0.001</b> |
|               | $\lambda_1'$ | 0.013          | 0.009        | 0.138            | <b>0.028</b>    | <b>0.011</b> | <b>0.013</b>     |
| Left ATR      | $\lambda_1$  | <b>0.175</b>   | <b>0.010</b> | <b>&lt;0.001</b> | <b>0.197</b>    | <b>0.014</b> | <b>&lt;0.001</b> |
|               | $\lambda_1'$ | <b>0.045</b>   | <b>0.006</b> | <b>&lt;0.001</b> | <b>0.089</b>    | <b>0.008</b> | <b>&lt;0.001</b> |
| Right ATR     | $\lambda_1$  | <b>0.172</b>   | <b>0.010</b> | <b>&lt;0.001</b> | <b>0.190</b>    | <b>0.014</b> | <b>&lt;0.001</b> |
|               | $\lambda_1'$ | <b>0.047</b>   | <b>0.006</b> | <b>&lt;0.001</b> | <b>0.089</b>    | <b>0.008</b> | <b>&lt;0.001</b> |
| Left CingG    | $\lambda_1$  | <b>0.272</b>   | <b>0.022</b> | <b>&lt;0.001</b> | <b>0.272</b>    | <b>0.018</b> | <b>&lt;0.001</b> |
|               | $\lambda_1'$ | -0.019         | 0.012        | 0.111            | 0.018           | 0.010        | 0.067            |
| Right CingG   | $\lambda_1$  | <b>0.254</b>   | <b>0.021</b> | <b>&lt;0.001</b> | <b>0.254</b>    | <b>0.018</b> | <b>&lt;0.001</b> |
|               | $\lambda_1'$ | -0.012         | 0.011        | 0.274            | <b>0.021</b>    | <b>0.010</b> | <b>0.031</b>     |
| Left CST      | $\lambda_1$  | <b>0.142</b>   | <b>0.015</b> | <b>&lt;0.001</b> | <b>0.181</b>    | <b>0.015</b> | <b>&lt;0.001</b> |
|               | $\lambda_1'$ | 0.013          | 0.008        | 0.102            | <b>0.022</b>    | <b>0.008</b> | <b>0.006</b>     |
| Right CST     | $\lambda_1$  | <b>0.148</b>   | <b>0.015</b> | <b>&lt;0.001</b> | 0.198           | 0.015        | <b>&lt;0.001</b> |
|               | $\lambda_1'$ | 0.013          | 0.008        | 0.097            | 0.013           | 0.008        | 0.098            |
| Forceps Major | $\lambda_1$  | <b>0.221</b>   | <b>0.024</b> | <b>&lt;0.001</b> | <b>0.267</b>    | <b>0.032</b> | <b>&lt;0.001</b> |
|               | $\lambda_1'$ | -0.003         | 0.013        | 0.823            | <b>0.057</b>    | <b>0.017</b> | <b>0.001</b>     |
| Forceps Minor | $\lambda_1$  | <b>0.262</b>   | <b>0.015</b> | <b>&lt;0.001</b> | <b>0.290</b>    | <b>0.018</b> | <b>&lt;0.001</b> |
|               | $\lambda_1'$ | 0.007          | 0.008        | 0.353            | <b>0.055</b>    | <b>0.010</b> | <b>&lt;0.001</b> |
| Left IFOF     | $\lambda_1$  | <b>0.213</b>   | <b>0.012</b> | <b>&lt;0.001</b> | <b>0.303</b>    | <b>0.014</b> | <b>&lt;0.001</b> |
|               | $\lambda_1'$ | <b>0.030</b>   | <b>0.006</b> | <b>&lt;0.001</b> | <b>0.063</b>    | <b>0.008</b> | <b>&lt;0.001</b> |
| Right IFOF    | $\lambda_1$  | <b>0.238</b>   | <b>0.012</b> | <b>&lt;0.001</b> | <b>0.324</b>    | <b>0.014</b> | <b>&lt;0.001</b> |
|               | $\lambda_1'$ | <b>0.019</b>   | <b>0.006</b> | <b>0.002</b>     | <b>0.056</b>    | <b>0.007</b> | <b>&lt;0.001</b> |
| Left ILF      | $\lambda_1$  | <b>0.189</b>   | <b>0.012</b> | <b>&lt;0.001</b> | <b>0.299</b>    | <b>0.016</b> | <b>&lt;0.001</b> |
|               | $\lambda_1'$ | <b>0.032</b>   | <b>0.007</b> | <b>&lt;0.001</b> | <b>0.062</b>    | <b>0.008</b> | <b>&lt;0.001</b> |
| Right ILF     | $\lambda_1$  | <b>0.200</b>   | <b>0.011</b> | <b>&lt;0.001</b> | <b>0.321</b>    | <b>0.014</b> | <b>&lt;0.001</b> |
|               | $\lambda_1'$ | <b>0.027</b>   | <b>0.006</b> | <b>&lt;0.001</b> | <b>0.052</b>    | <b>0.008</b> | <b>&lt;0.001</b> |
| Left PTR      | $\lambda_1$  | <b>0.173</b>   | <b>0.016</b> | <b>&lt;0.001</b> | <b>0.230</b>    | <b>0.020</b> | <b>&lt;0.001</b> |
|               | $\lambda_1'$ | <b>0.045</b>   | <b>0.009</b> | <b>&lt;0.001</b> | <b>0.073</b>    | <b>0.011</b> | <b>&lt;0.001</b> |
| Right PTR     | $\lambda_1$  | <b>0.188</b>   | <b>0.015</b> | <b>&lt;0.001</b> | <b>0.272</b>    | <b>0.020</b> | <b>&lt;0.001</b> |
|               | $\lambda_1'$ | <b>0.045</b>   | <b>0.008</b> | <b>&lt;0.001</b> | <b>0.057</b>    | <b>0.011</b> | <b>&lt;0.001</b> |
| Left SLF      | $\lambda_1$  | <b>0.198</b>   | <b>0.010</b> | <b>&lt;0.001</b> | <b>0.283</b>    | <b>0.014</b> | <b>&lt;0.001</b> |
|               | $\lambda_1'$ | <b>0.033</b>   | <b>0.005</b> | <b>&lt;0.001</b> | <b>0.063</b>    | <b>0.008</b> | <b>&lt;0.001</b> |
| Right SLF     | $\lambda_1$  | <b>0.207</b>   | <b>0.010</b> | <b>&lt;0.001</b> | <b>0.284</b>    | <b>0.014</b> | <b>&lt;0.001</b> |
|               | $\lambda_1'$ | <b>0.031</b>   | <b>0.006</b> | <b>&lt;0.001</b> | <b>0.061</b>    | <b>0.008</b> | <b>&lt;0.001</b> |
| Left STR      | $\lambda_1$  | <b>0.163</b>   | <b>0.013</b> | <b>&lt;0.001</b> | <b>0.174</b>    | <b>0.013</b> | <b>&lt;0.001</b> |
|               | $\lambda_1'$ | <b>0.038</b>   | <b>0.007</b> | <b>&lt;0.001</b> | <b>0.058</b>    | <b>0.007</b> | <b>&lt;0.001</b> |
| Right STR     | $\lambda_1$  | <b>0.184</b>   | <b>0.013</b> | <b>&lt;0.001</b> | <b>0.192</b>    | <b>0.014</b> | <b>&lt;0.001</b> |
|               | $\lambda_1'$ | <b>0.029</b>   | <b>0.007</b> | <b>&lt;0.001</b> | <b>0.048</b>    | <b>0.008</b> | <b>&lt;0.001</b> |
| Left Unc      | $\lambda_1$  | <b>0.144</b>   | <b>0.016</b> | <b>&lt;0.001</b> | <b>0.303</b>    | <b>0.022</b> | <b>&lt;0.001</b> |
|               | $\lambda_1'$ | <b>0.021</b>   | <b>0.008</b> | <b>0.009</b>     | <b>0.029</b>    | <b>0.012</b> | <b>0.011</b>     |
| Right Unc     | $\lambda_1$  | <b>0.160</b>   | <b>0.013</b> | <b>&lt;0.001</b> | <b>0.277</b>    | <b>0.017</b> | <b>&lt;0.001</b> |
|               | $\lambda_1'$ | <b>0.020</b>   | <b>0.007</b> | <b>0.003</b>     | <b>0.034</b>    | <b>0.009</b> | <b>&lt;0.001</b> |

Note. All estimates are unstandardized. Parameters that were statistically significantly different from zero are in bold. These figures correspond to the trends shown in the leftmost panels of Figures S8-S12.

Supplementary Table 19. Statistical significance tests for  $\lambda_2$  and  $\lambda_2'$  parameters (main effects and age moderation effects of tract-specific uniquenesses) in the dedifferentiation models for FA, MD, ICVF, ISOVF and OD (Equation S2 specification).

| Tract         | Parameter    | FA           |              |                  | MD            |              |                  | ICVF          |              |                  | ISOVF         |              |                  | OD           |              |                  |
|---------------|--------------|--------------|--------------|------------------|---------------|--------------|------------------|---------------|--------------|------------------|---------------|--------------|------------------|--------------|--------------|------------------|
|               |              | Est.         | SE           | <i>p</i>         | Est.          | SE           | <i>p</i>         | Est.          | SE           | <i>p</i>         | Est.          | SE           | <i>p</i>         | Est.         | SE           | <i>p</i>         |
| Left AR       | $\lambda_2$  | <b>1.749</b> | <b>0.048</b> | <b>&lt;0.001</b> | <b>0.345</b>  | <b>0.010</b> | <b>&lt;0.001</b> | <b>1.381</b>  | <b>0.036</b> | <b>&lt;0.001</b> | <b>2.099</b>  | <b>0.057</b> | <b>&lt;0.001</b> | <b>1.553</b> | <b>0.046</b> | <b>&lt;0.001</b> |
|               | $\lambda_2'$ | -0.014       | 0.024        | 0.565            | -0.049        | 0.049        | 0.315            | 0.004         | 0.018        | 0.842            | <b>-0.080</b> | <b>0.029</b> | <b>0.006</b>     | -0.006       | 0.024        | 0.804            |
| Right AR      | $\lambda_2$  | <b>1.574</b> | <b>0.045</b> | <b>&lt;0.001</b> | <b>0.316</b>  | <b>0.009</b> | <b>&lt;0.001</b> | <b>1.331</b>  | <b>0.035</b> | <b>&lt;0.001</b> | <b>1.782</b>  | <b>0.051</b> | <b>&lt;0.001</b> | <b>1.417</b> | <b>0.042</b> | <b>&lt;0.001</b> |
|               | $\lambda_2'$ | 0.024        | 0.023        | 0.293            | <b>-0.096</b> | <b>0.045</b> | <b>0.034</b>     | <b>0.034</b>  | <b>0.017</b> | <b>0.047</b>     | -0.047        | 0.026        | 0.076            | 0.006        | 0.021        | 0.794            |
| Left ATR      | $\lambda_2$  | <b>1.070</b> | <b>0.026</b> | <b>&lt;0.001</b> | <b>0.154</b>  | <b>0.004</b> | <b>&lt;0.001</b> | <b>1.186</b>  | <b>0.026</b> | <b>&lt;0.001</b> | <b>0.813</b>  | <b>0.018</b> | <b>&lt;0.001</b> | <b>0.819</b> | <b>0.019</b> | <b>&lt;0.001</b> |
|               | $\lambda_2'$ | 0.009        | 0.012        | 0.467            | <b>0.095</b>  | <b>0.016</b> | <b>&lt;0.001</b> | <b>0.029</b>  | <b>0.011</b> | <b>0.009</b>     | <b>0.035</b>  | <b>0.008</b> | <b>&lt;0.001</b> | -0.012       | 0.008        | 0.146            |
| Right ATR     | $\lambda_2$  | <b>1.033</b> | <b>0.024</b> | <b>&lt;0.001</b> | <b>0.147</b>  | <b>0.003</b> | <b>&lt;0.001</b> | <b>1.184</b>  | <b>0.025</b> | <b>&lt;0.001</b> | <b>0.742</b>  | <b>0.018</b> | <b>&lt;0.001</b> | <b>0.789</b> | <b>0.020</b> | <b>&lt;0.001</b> |
|               | $\lambda_2'$ | <b>0.035</b> | <b>0.011</b> | <b>0.002</b>     | <b>0.128</b>  | <b>0.015</b> | <b>&lt;0.001</b> | <b>0.047</b>  | <b>0.011</b> | <b>&lt;0.001</b> | <b>0.054</b>  | <b>0.008</b> | <b>&lt;0.001</b> | <b>0.020</b> | <b>0.009</b> | <b>0.031</b>     |
| Left CingG    | $\lambda_2$  | <b>2.743</b> | <b>0.073</b> | <b>&lt;0.001</b> | <b>0.175</b>  | <b>0.004</b> | <b>&lt;0.001</b> | <b>2.243</b>  | <b>0.054</b> | <b>&lt;0.001</b> | <b>1.206</b>  | <b>0.034</b> | <b>&lt;0.001</b> | <b>1.496</b> | <b>0.044</b> | <b>&lt;0.001</b> |
|               | $\lambda_2'$ | <b>0.078</b> | <b>0.037</b> | <b>0.034</b>     | <b>0.065</b>  | <b>0.020</b> | <b>0.001</b>     | -0.004        | 0.026        | 0.864            | <b>0.053</b>  | <b>0.017</b> | <b>0.002</b>     | <b>0.086</b> | <b>0.023</b> | <b>&lt;0.001</b> |
| Right CingG   | $\lambda_2$  | <b>2.935</b> | <b>0.076</b> | <b>&lt;0.001</b> | <b>0.175</b>  | <b>0.004</b> | <b>&lt;0.001</b> | <b>2.123</b>  | <b>0.051</b> | <b>&lt;0.001</b> | <b>1.123</b>  | <b>0.030</b> | <b>&lt;0.001</b> | <b>1.787</b> | <b>0.049</b> | <b>&lt;0.001</b> |
|               | $\lambda_2'$ | -0.003       | 0.038        | 0.935            | <b>0.057</b>  | <b>0.020</b> | <b>0.003</b>     | -0.006        | 0.024        | 0.808            | -0.001        | 0.014        | 0.924            | 0.032        | 0.025        | 0.196            |
| Left CST      | $\lambda_2$  | <b>1.837</b> | <b>0.036</b> | <b>&lt;0.001</b> | <b>0.182</b>  | <b>0.004</b> | <b>&lt;0.001</b> | <b>1.378</b>  | <b>0.026</b> | <b>&lt;0.001</b> | <b>1.228</b>  | <b>0.029</b> | <b>&lt;0.001</b> | <b>1.322</b> | <b>0.023</b> | <b>&lt;0.001</b> |
|               | $\lambda_2'$ | 0.012        | 0.016        | 0.444            | 0.028         | 0.022        | 0.205            | <b>0.025</b>  | <b>0.011</b> | <b>0.026</b>     | 0.013         | 0.014        | 0.360            | -0.012       | 0.010        | 0.205            |
| Right CST     | $\lambda_2$  | <b>1.901</b> | <b>0.037</b> | <b>&lt;0.001</b> | <b>0.180</b>  | <b>0.004</b> | <b>&lt;0.001</b> | <b>1.484</b>  | <b>0.026</b> | <b>&lt;0.001</b> | <b>1.124</b>  | <b>0.027</b> | <b>&lt;0.001</b> | <b>1.280</b> | <b>0.023</b> | <b>&lt;0.001</b> |
|               | $\lambda_2'$ | -0.003       | 0.017        | 0.867            | 0.020         | 0.021        | 0.337            | -0.005        | 0.011        | 0.691            | <b>0.041</b>  | <b>0.014</b> | <b>0.002</b>     | -0.016       | 0.010        | 0.104            |
| Forceps Major | $\lambda_2$  | <b>1.967</b> | <b>0.063</b> | <b>&lt;0.001</b> | <b>0.428</b>  | <b>0.013</b> | <b>&lt;0.001</b> | <b>1.573</b>  | <b>0.052</b> | <b>&lt;0.001</b> | <b>2.384</b>  | <b>0.070</b> | <b>&lt;0.001</b> | <b>0.913</b> | <b>0.029</b> | <b>&lt;0.001</b> |
|               | $\lambda_2'$ | <b>0.111</b> | <b>0.034</b> | <b>0.001</b>     | <b>0.163</b>  | <b>0.068</b> | <b>0.017</b>     | <b>0.131</b>  | <b>0.029</b> | <b>&lt;0.001</b> | 0.032         | 0.036        | 0.378            | 0.015        | 0.015        | 0.328            |
| Forceps Minor | $\lambda_2$  | <b>1.139</b> | <b>0.040</b> | <b>&lt;0.001</b> | <b>0.199</b>  | <b>0.006</b> | <b>&lt;0.001</b> | <b>1.277</b>  | <b>0.040</b> | <b>&lt;0.001</b> | <b>1.258</b>  | <b>0.040</b> | <b>&lt;0.001</b> | <b>0.809</b> | <b>0.026</b> | <b>&lt;0.001</b> |
|               | $\lambda_2'$ | -0.002       | 0.021        | 0.909            | <b>0.089</b>  | <b>0.034</b> | <b>0.009</b>     | <b>0.055</b>  | <b>0.021</b> | <b>0.008</b>     | <b>0.046</b>  | <b>0.021</b> | <b>0.028</b>     | 0.018        | 0.014        | 0.182            |
| Left IFOF     | $\lambda_2$  | <b>1.068</b> | <b>0.027</b> | <b>&lt;0.001</b> | <b>0.139</b>  | <b>0.003</b> | <b>&lt;0.001</b> | <b>0.800</b>  | <b>0.016</b> | <b>&lt;0.001</b> | <b>0.636</b>  | <b>0.015</b> | <b>&lt;0.001</b> | <b>0.724</b> | <b>0.023</b> | <b>&lt;0.001</b> |
|               | $\lambda_2'$ | 0.005        | 0.012        | 0.710            | <b>0.059</b>  | <b>0.010</b> | <b>&lt;0.001</b> | <b>0.035</b>  | <b>0.007</b> | <b>&lt;0.001</b> | <b>0.018</b>  | <b>0.007</b> | <b>0.007</b>     | -0.001       | 0.011        | 0.955            |
| Right IFOF    | $\lambda_2$  | <b>1.010</b> | <b>0.023</b> | <b>&lt;0.001</b> | <b>0.125</b>  | <b>0.003</b> | <b>&lt;0.001</b> | <b>0.868</b>  | <b>0.021</b> | <b>&lt;0.001</b> | <b>0.596</b>  | <b>0.017</b> | <b>&lt;0.001</b> | <b>0.675</b> | <b>0.022</b> | <b>&lt;0.001</b> |
|               | $\lambda_2'$ | 0.012        | 0.010        | 0.222            | <b>0.056</b>  | <b>0.013</b> | <b>&lt;0.001</b> | -0.001        | 0.009        | 0.935            | <b>0.021</b>  | <b>0.008</b> | <b>0.010</b>     | 0.006        | 0.011        | 0.553            |
| Left ILF      | $\lambda_2$  | <b>1.133</b> | <b>0.022</b> | <b>&lt;0.001</b> | <b>0.174</b>  | <b>0.003</b> | <b>&lt;0.001</b> | <b>0.970</b>  | <b>0.018</b> | <b>&lt;0.001</b> | <b>0.724</b>  | <b>0.015</b> | <b>&lt;0.001</b> | <b>0.616</b> | <b>0.018</b> | <b>&lt;0.001</b> |
|               | $\lambda_2'$ | -0.009       | 0.008        | 0.310            | <b>0.022</b>  | <b>0.009</b> | <b>0.015</b>     | <b>0.012</b>  | <b>0.006</b> | <b>0.047</b>     | <b>0.013</b>  | <b>0.006</b> | <b>0.038</b>     | 0.010        | 0.009        | 0.268            |
| Right ILF     | $\lambda_2$  | <b>0.923</b> | <b>0.020</b> | <b>&lt;0.001</b> | <b>0.145</b>  | <b>0.003</b> | <b>&lt;0.001</b> | <b>0.904</b>  | <b>0.016</b> | <b>&lt;0.001</b> | <b>0.597</b>  | <b>0.017</b> | <b>&lt;0.001</b> | <b>0.600</b> | <b>0.015</b> | <b>&lt;0.001</b> |
|               | $\lambda_2'$ | 0.009        | 0.008        | 0.226            | <b>0.058</b>  | <b>0.011</b> | <b>&lt;0.001</b> | <b>0.016</b>  | <b>0.006</b> | <b>0.008</b>     | <b>0.025</b>  | <b>0.007</b> | <b>0.001</b>     | -0.001       | 0.008        | 0.922            |
| Left PTR      | $\lambda_2$  | <b>1.510</b> | <b>0.028</b> | <b>&lt;0.001</b> | <b>0.255</b>  | <b>0.006</b> | <b>&lt;0.001</b> | <b>1.382</b>  | <b>0.025</b> | <b>&lt;0.001</b> | <b>1.516</b>  | <b>0.033</b> | <b>&lt;0.001</b> | <b>0.836</b> | <b>0.022</b> | <b>&lt;0.001</b> |
|               | $\lambda_2'$ | <b>0.027</b> | <b>0.012</b> | <b>0.022</b>     | <b>0.130</b>  | <b>0.025</b> | <b>&lt;0.001</b> | 0.012         | 0.009        | 0.205            | <b>0.089</b>  | <b>0.014</b> | <b>&lt;0.001</b> | -0.007       | 0.011        | 0.537            |
| Right PTR     | $\lambda_2$  | <b>1.500</b> | <b>0.029</b> | <b>&lt;0.001</b> | <b>0.221</b>  | <b>0.005</b> | <b>&lt;0.001</b> | <b>1.377</b>  | <b>0.025</b> | <b>&lt;0.001</b> | <b>1.386</b>  | <b>0.030</b> | <b>&lt;0.001</b> | <b>0.835</b> | <b>0.022</b> | <b>&lt;0.001</b> |
|               | $\lambda_2'$ | 0.017        | 0.013        | 0.177            | <b>0.195</b>  | <b>0.024</b> | <b>&lt;0.001</b> | <b>0.032</b>  | <b>0.010</b> | <b>0.001</b>     | <b>0.102</b>  | <b>0.014</b> | <b>&lt;0.001</b> | 0.013        | 0.011        | 0.246            |
| Left SLF      | $\lambda_2$  | <b>1.160</b> | <b>0.029</b> | <b>&lt;0.001</b> | <b>0.110</b>  | <b>0.003</b> | <b>&lt;0.001</b> | <b>1.120</b>  | <b>0.026</b> | <b>&lt;0.001</b> | <b>0.797</b>  | <b>0.016</b> | <b>&lt;0.001</b> | <b>1.014</b> | <b>0.022</b> | <b>&lt;0.001</b> |
|               | $\lambda_2'$ | -0.005       | 0.013        | 0.705            | <b>0.060</b>  | <b>0.014</b> | <b>&lt;0.001</b> | <b>0.037</b>  | <b>0.012</b> | <b>0.002</b>     | <b>0.019</b>  | <b>0.006</b> | <b>0.002</b>     | 0.003        | 0.010        | 0.769            |
| Right SLF     | $\lambda_2$  | <b>1.105</b> | <b>0.029</b> | <b>&lt;0.001</b> | <b>0.117</b>  | <b>0.003</b> | <b>&lt;0.001</b> | <b>1.269</b>  | <b>0.028</b> | <b>&lt;0.001</b> | <b>0.760</b>  | <b>0.017</b> | <b>&lt;0.001</b> | <b>1.032</b> | <b>0.022</b> | <b>&lt;0.001</b> |
|               | $\lambda_2'$ | -0.015       | 0.014        | 0.267            | <b>0.064</b>  | <b>0.015</b> | <b>&lt;0.001</b> | -0.003        | 0.012        | 0.809            | <b>0.031</b>  | <b>0.007</b> | <b>&lt;0.001</b> | -0.008       | 0.010        | 0.411            |
| Left STR      | $\lambda_2$  | <b>1.349</b> | <b>0.024</b> | <b>&lt;0.001</b> | <b>0.155</b>  | <b>0.003</b> | <b>&lt;0.001</b> | <b>1.310</b>  | <b>0.025</b> | <b>&lt;0.001</b> | <b>0.865</b>  | <b>0.017</b> | <b>&lt;0.001</b> | <b>1.279</b> | <b>0.021</b> | <b>&lt;0.001</b> |
|               | $\lambda_2'$ | <b>0.021</b> | <b>0.009</b> | <b>0.021</b>     | <b>0.029</b>  | <b>0.014</b> | <b>0.044</b>     | 0.020         | 0.010        | 0.053            | <b>0.013</b>  | <b>0.006</b> | <b>0.041</b>     | <b>0.029</b> | <b>0.008</b> | <b>&lt;0.001</b> |
| Right STR     | $\lambda_2$  | <b>1.457</b> | <b>0.025</b> | <b>&lt;0.001</b> | <b>0.164</b>  | <b>0.003</b> | <b>&lt;0.001</b> | <b>1.397</b>  | <b>0.024</b> | <b>&lt;0.001</b> | <b>0.926</b>  | <b>0.017</b> | <b>&lt;0.001</b> | <b>1.337</b> | <b>0.021</b> | <b>&lt;0.001</b> |
|               | $\lambda_2'$ | 0.004        | 0.009        | 0.687            | <b>0.031</b>  | <b>0.014</b> | <b>0.020</b>     | 0.008         | 0.009        | 0.407            | 0.010         | 0.007        | 0.140            | -0.004       | 0.007        | 0.628            |
| Left Unc      | $\lambda_2$  | <b>1.709</b> | <b>0.048</b> | <b>&lt;0.001</b> | <b>0.289</b>  | <b>0.006</b> | <b>&lt;0.001</b> | <b>1.815</b>  | <b>0.041</b> | <b>&lt;0.001</b> | <b>0.860</b>  | <b>0.023</b> | <b>&lt;0.001</b> | <b>1.402</b> | <b>0.039</b> | <b>&lt;0.001</b> |
|               | $\lambda_2'$ | 0.023        | 0.025        | 0.359            | -0.016        | 0.025        | 0.524            | <b>-0.044</b> | <b>0.019</b> | <b>0.019</b>     | <b>0.044</b>  | <b>0.012</b> | <b>&lt;0.001</b> | 0.013        | 0.020        | 0.513            |
| Right Unc     | $\lambda_2$  | <b>1.438</b> | <b>0.043</b> | <b>&lt;0.001</b> | <b>0.210</b>  | <b>0.005</b> | <b>&lt;0.001</b> | <b>1.388</b>  | <b>0.034</b> | <b>&lt;0.001</b> | <b>0.703</b>  | <b>0.021</b> | <b>&lt;0.001</b> | <b>1.229</b> | <b>0.036</b> | <b>&lt;0.001</b> |
|               | $\lambda_2'$ | 0.029        | 0.022        | 0.194            | <b>0.075</b>  | <b>0.023</b> | <b>0.001</b>     | <b>0.041</b>  | <b>0.016</b> | <b>0.011</b>     | <b>0.057</b>  | <b>0.011</b> | <b>&lt;0.001</b> | <b>0.053</b> | <b>0.019</b> | <b>0.005</b>     |

Note. All estimates unstandardized. Parameters that were statistically significantly different from zero are in bold. These figures correspond to the age trends shown in the centre panels of Figures S10-16.

Supplementary Table 20. Statistical significance tests for  $\lambda_2$  and  $\lambda_2'$  parameters (main effects and age moderation effects of tract-specific uniquenesses) in the dedifferentiation models for  $\lambda_{ax}$  and  $\lambda_{rad}$  (Equation S2 specification).

| Tract         | Parameter    | $\lambda_{ax}$ |              |                  | $\lambda_{rad}$ |              |                  |
|---------------|--------------|----------------|--------------|------------------|-----------------|--------------|------------------|
|               |              | Est.           | SE           | <i>p</i>         | Est.            | SE           | <i>p</i>         |
| Left          | $\lambda_2$  | <b>0.447</b>   | <b>0.013</b> | <b>&lt;0.001</b> | <b>0.494</b>    | <b>0.014</b> | <b>&lt;0.001</b> |
| AR            | $\lambda_2'$ | -0.006         | 0.006        | 0.373            | -0.005          | 0.007        | 0.492            |
| Right         | $\lambda_2$  | <b>0.377</b>   | <b>0.011</b> | <b>&lt;0.001</b> | <b>0.471</b>    | <b>0.013</b> | <b>&lt;0.001</b> |
| AR            | $\lambda_2'$ | -0.004         | 0.006        | 0.461            | -0.012          | 0.007        | 0.064            |
| Left          | $\lambda_2$  | <b>0.183</b>   | <b>0.004</b> | <b>&lt;0.001</b> | <b>0.263</b>    | <b>0.006</b> | <b>&lt;0.001</b> |
| ATR           | $\lambda_2'$ | <b>0.007</b>   | <b>0.002</b> | <b>&lt;0.001</b> | <b>0.011</b>    | <b>0.003</b> | <b>&lt;0.001</b> |
| Right         | $\lambda_2$  | <b>0.180</b>   | <b>0.004</b> | <b>&lt;0.001</b> | <b>0.237</b>    | <b>0.006</b> | <b>&lt;0.001</b> |
| ATR           | $\lambda_2'$ | <b>0.011</b>   | <b>0.002</b> | <b>&lt;0.001</b> | <b>0.022</b>    | <b>0.002</b> | <b>&lt;0.001</b> |
| Left          | $\lambda_2$  | <b>0.456</b>   | <b>0.012</b> | <b>&lt;0.001</b> | <b>0.369</b>    | <b>0.009</b> | <b>&lt;0.001</b> |
| CingG         | $\lambda_2'$ | <b>0.027</b>   | <b>0.006</b> | <b>&lt;0.001</b> | -0.001          | 0.004        | 0.898            |
| Right         | $\lambda_2$  | <b>0.447</b>   | <b>0.012</b> | <b>&lt;0.001</b> | <b>0.379</b>    | <b>0.009</b> | <b>&lt;0.001</b> |
| CingG         | $\lambda_2'$ | 0.011          | 0.006        | 0.050            | -0.002          | 0.004        | 0.655            |
| Left          | $\lambda_2$  | <b>0.328</b>   | <b>0.007</b> | <b>&lt;0.001</b> | <b>0.303</b>    | <b>0.007</b> | <b>&lt;0.001</b> |
| CST           | $\lambda_2'$ | 0.000          | 0.003        | 0.899            | 0.005           | 0.004        | 0.131            |
| Right         | $\lambda_2$  | <b>0.339</b>   | <b>0.007</b> | <b>&lt;0.001</b> | <b>0.296</b>    | <b>0.007</b> | <b>&lt;0.001</b> |
| CST           | $\lambda_2'$ | -0.006         | 0.003        | 0.061            | 0.005           | 0.003        | 0.126            |
| Forceps Major | $\lambda_2$  | <b>0.524</b>   | <b>0.016</b> | <b>&lt;0.001</b> | <b>0.666</b>    | <b>0.020</b> | <b>&lt;0.001</b> |
| Forceps Minor | $\lambda_2'$ | 0.007          | 0.008        | 0.404            | <b>0.027</b>    | <b>0.011</b> | 0.011            |
| Left          | $\lambda_2$  | <b>0.286</b>   | <b>0.010</b> | <b>&lt;0.001</b> | <b>0.332</b>    | <b>0.010</b> | <b>&lt;0.001</b> |
| Right         | $\lambda_2$  | 0.010          | 0.005        | 0.049            | 0.002           | 0.005        | 0.649            |
| Left          | $\lambda_2$  | <b>0.202</b>   | <b>0.004</b> | <b>&lt;0.001</b> | <b>0.207</b>    | <b>0.005</b> | <b>&lt;0.001</b> |
| IFOF          | $\lambda_2'$ | <b>0.006</b>   | <b>0.002</b> | <b>0.007</b>     | <b>0.005</b>    | <b>0.002</b> | 0.012            |
| Right         | $\lambda_2$  | <b>0.205</b>   | <b>0.006</b> | <b>&lt;0.001</b> | <b>0.168</b>    | <b>0.005</b> | <b>&lt;0.001</b> |
| IFOF          | $\lambda_2'$ | 0.001          | 0.003        | 0.838            | <b>0.008</b>    | <b>0.002</b> | 0.001            |
| Left          | $\lambda_2$  | <b>0.227</b>   | <b>0.005</b> | <b>&lt;0.001</b> | <b>0.256</b>    | <b>0.006</b> | <b>&lt;0.001</b> |
| ILF           | $\lambda_2'$ | 0.003          | 0.002        | 0.095            | 0.000           | 0.002        | 0.928            |
| Right         | $\lambda_2$  | <b>0.180</b>   | <b>0.004</b> | <b>&lt;0.001</b> | <b>0.191</b>    | <b>0.004</b> | <b>&lt;0.001</b> |
| ILF           | $\lambda_2'$ | <b>0.005</b>   | <b>0.002</b> | <b>0.004</b>     | <b>0.011</b>    | <b>0.002</b> | <b>&lt;0.001</b> |
| Left          | $\lambda_2$  | <b>0.320</b>   | <b>0.007</b> | <b>&lt;0.001</b> | <b>0.394</b>    | <b>0.008</b> | <b>&lt;0.001</b> |
| PTR           | $\lambda_2'$ | <b>0.015</b>   | <b>0.003</b> | <b>&lt;0.001</b> | <b>0.026</b>    | <b>0.003</b> | <b>&lt;0.001</b> |
| Right         | $\lambda_2$  | <b>0.285</b>   | <b>0.007</b> | <b>&lt;0.001</b> | <b>0.368</b>    | <b>0.008</b> | <b>&lt;0.001</b> |
| PTR           | $\lambda_2'$ | <b>0.020</b>   | <b>0.003</b> | <b>&lt;0.001</b> | <b>0.022</b>    | <b>0.003</b> | <b>&lt;0.001</b> |
| Left          | $\lambda_2$  | <b>0.170</b>   | <b>0.005</b> | <b>&lt;0.001</b> | <b>0.201</b>    | <b>0.005</b> | <b>&lt;0.001</b> |
| SLF           | $\lambda_2'$ | <b>0.004</b>   | <b>0.002</b> | <b>0.024</b>     | <b>0.008</b>    | <b>0.002</b> | 0.001            |
| Right         | $\lambda_2$  | <b>0.171</b>   | <b>0.004</b> | <b>&lt;0.001</b> | <b>0.207</b>    | <b>0.005</b> | <b>&lt;0.001</b> |
| SLF           | $\lambda_2'$ | <b>0.004</b>   | <b>0.002</b> | <b>0.042</b>     | <b>0.008</b>    | <b>0.002</b> | 0.002            |
| Left          | $\lambda_2$  | <b>0.248</b>   | <b>0.005</b> | <b>&lt;0.001</b> | <b>0.265</b>    | <b>0.005</b> | <b>&lt;0.001</b> |
| STR           | $\lambda_2'$ | <b>0.006</b>   | <b>0.002</b> | <b>0.002</b>     | 0.004           | 0.002        | 0.124            |
| Right         | $\lambda_2$  | <b>0.259</b>   | <b>0.005</b> | <b>&lt;0.001</b> | <b>0.272</b>    | <b>0.005</b> | <b>&lt;0.001</b> |
| STR           | $\lambda_2'$ | -0.001         | 0.002        | 0.465            | <b>0.007</b>    | <b>0.002</b> | <b>0.002</b>     |
| Left          | $\lambda_2$  | <b>0.337</b>   | <b>0.006</b> | <b>&lt;0.001</b> | <b>0.416</b>    | <b>0.010</b> | <b>&lt;0.001</b> |
| Unc           | $\lambda_2'$ | 0.000          | 0.003        | 0.994            | <b>0.018</b>    | <b>0.005</b> | <b>&lt;0.001</b> |
| Right         | $\lambda_2$  | <b>0.250</b>   | <b>0.005</b> | <b>&lt;0.001</b> | <b>0.297</b>    | <b>0.008</b> | <b>&lt;0.001</b> |
| Unc           | $\lambda_2'$ | <b>0.017</b>   | <b>0.002</b> | <b>&lt;0.001</b> | <b>0.027</b>    | <b>0.004</b> | <b>&lt;0.001</b> |

Note. All estimates are unstandardized. Parameters that were statistically significantly different from zero are in bold. These figures correspond to the age trends shown in the centre panels of Figures S10-16.
